# Supplementary material for: The tsRNAs (tRFdb-3013a/b) serve as novel biomarkers for colon adenocarcinomas
Source: publisher site journal article supplement (doi:10.18632/aging.205590), 2024-03-06
Supplement: Supplementary file [file aging-v16i5-205590-supplementary-material-SD2.pdf]

SUPPLEMENTARY FIGURES

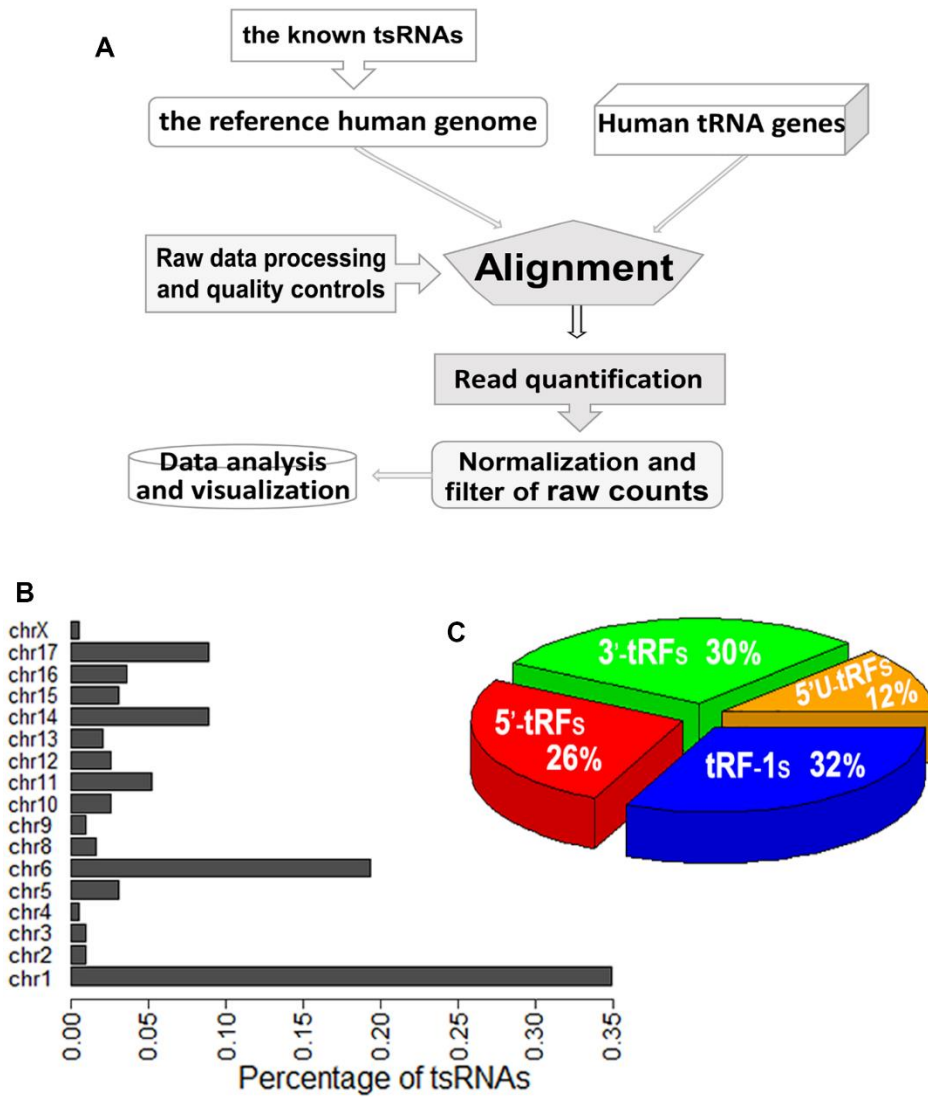

**Supplementary Figure 1. A summary of tsRNAs identification and characterization. (A)** The flow chart of data processing and tsRNAs identification pipeline. **(C)** The characterization of tsRNA corresponding derived tRNA gene sources and **(B)** the chromosome locations statistical analysis.

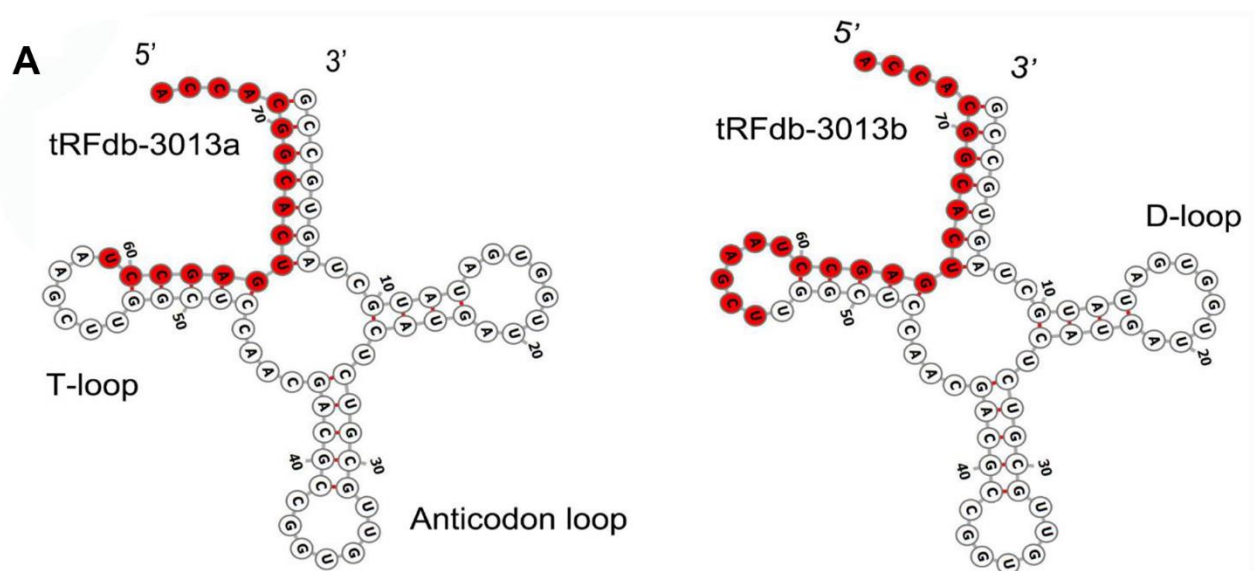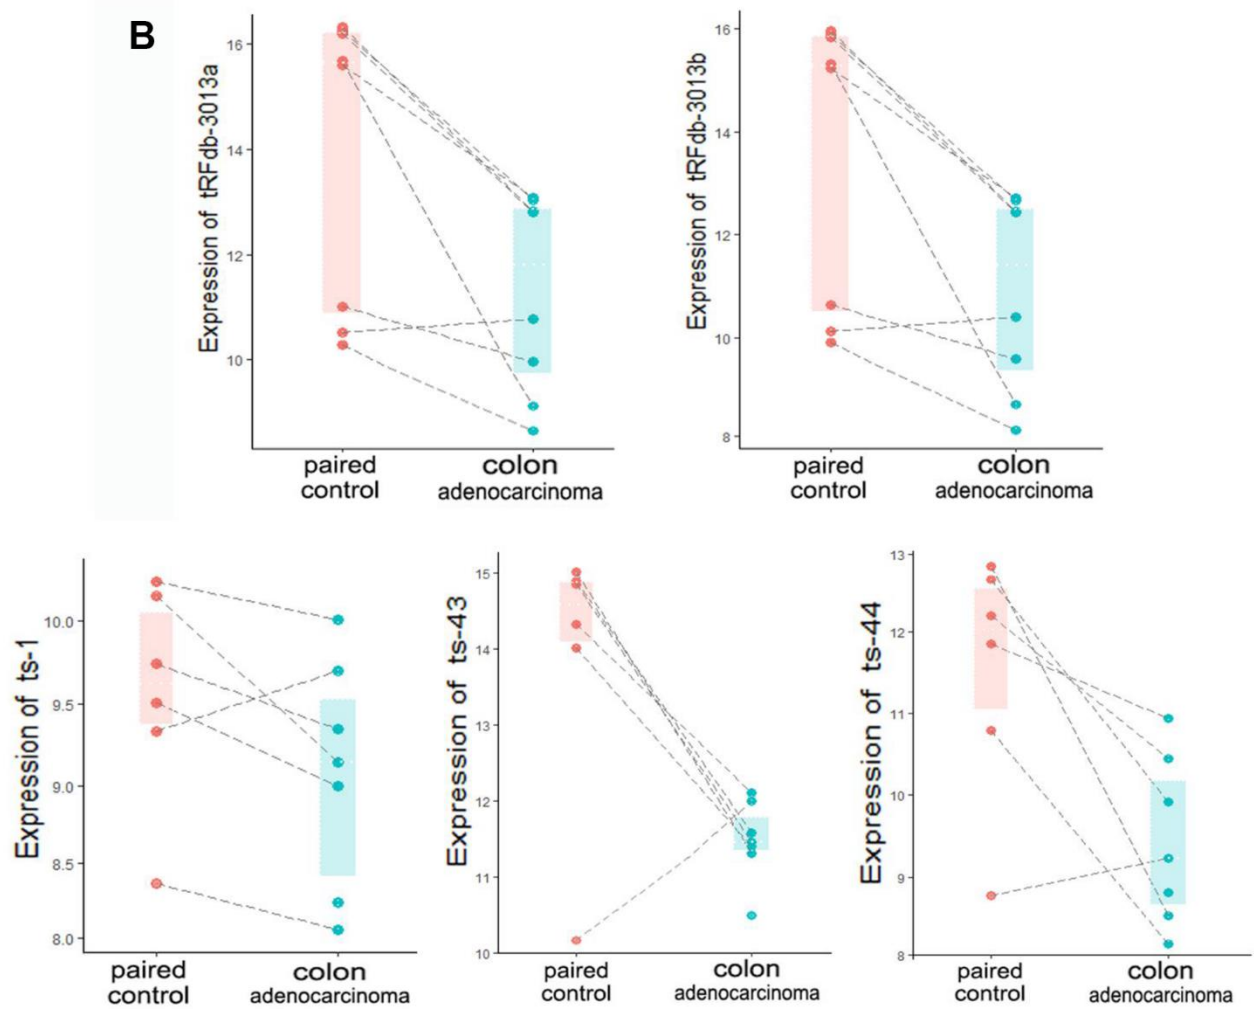

**Supplementary Figure 2.** (A) Representative secondary structure of tRNA-His-GUG and its derived fragments (tRFdb-3013a and tRFdb-3013b). (B) The expression patterns of several tRNA-His-GTG derived tsRNA fragments (including tRFdb-3013a, tRFdb-3013b, ts-1, ts-43 and ts-44) in paired colon adenocarcinomas and non-tumor controls of TCGA-COAD datasets.

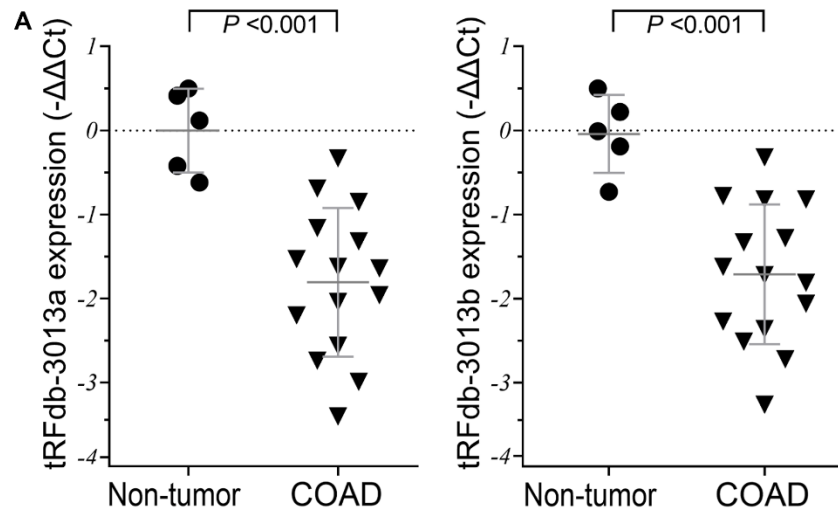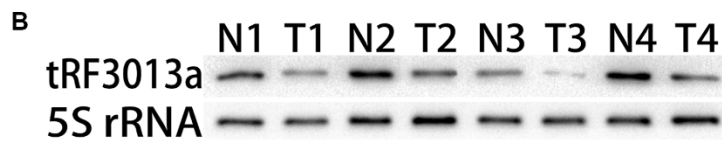

**Supplementary Figure 3.** (A) The boxplot of tRFdb-3013a/b expression between non-tumor controls and colon adenocarcinomas with the stem-loop tsRNA qRT-PCR analysis. (B) The Northern blotting analysis of tRFdb-3013a (tRF3013a) between non-tumor controls (N1-4) and colon adenocarcinoma (T1-4) samples (all  $P < 0.01$ ).

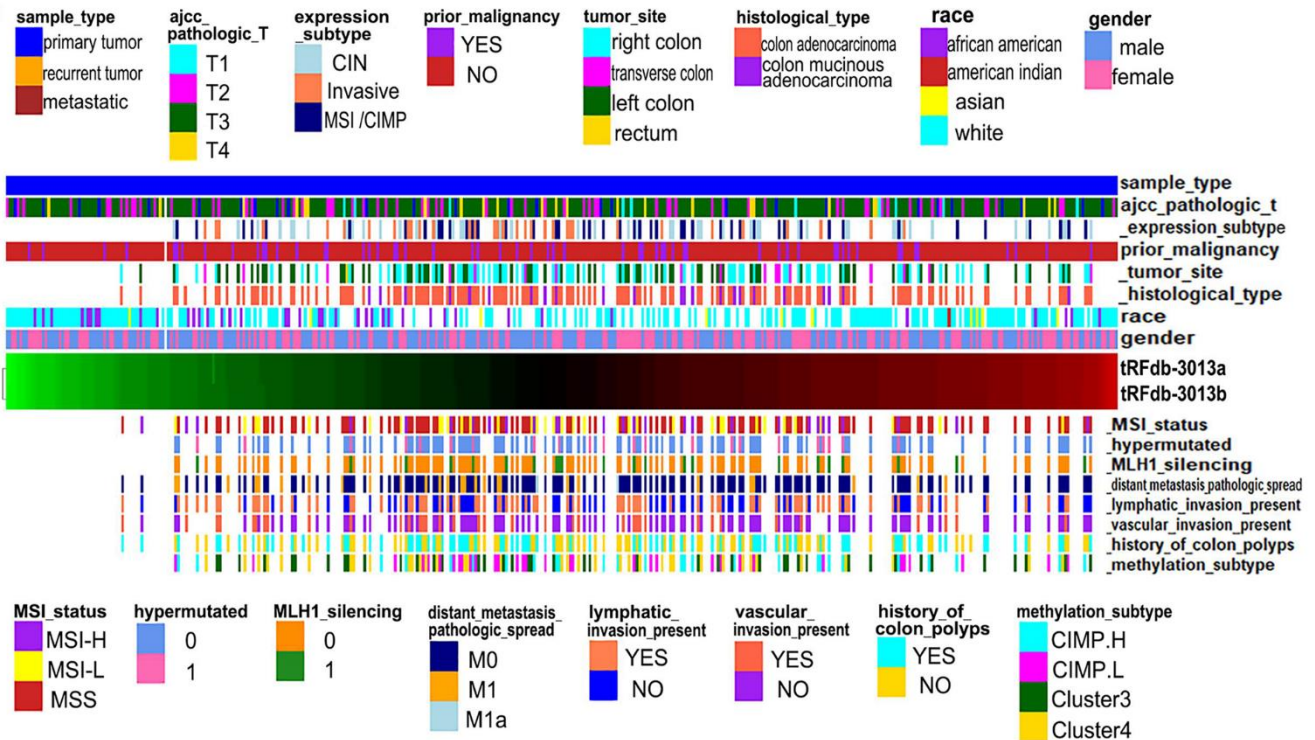

**Supplementary Figure 4.** The correlation analysis of tRFdb-3013a/b expression with the primary pathology characteristics. Hierarchical clustering heatmap of tRFdb-3013a/b expression and the pathology characteristics parameters.

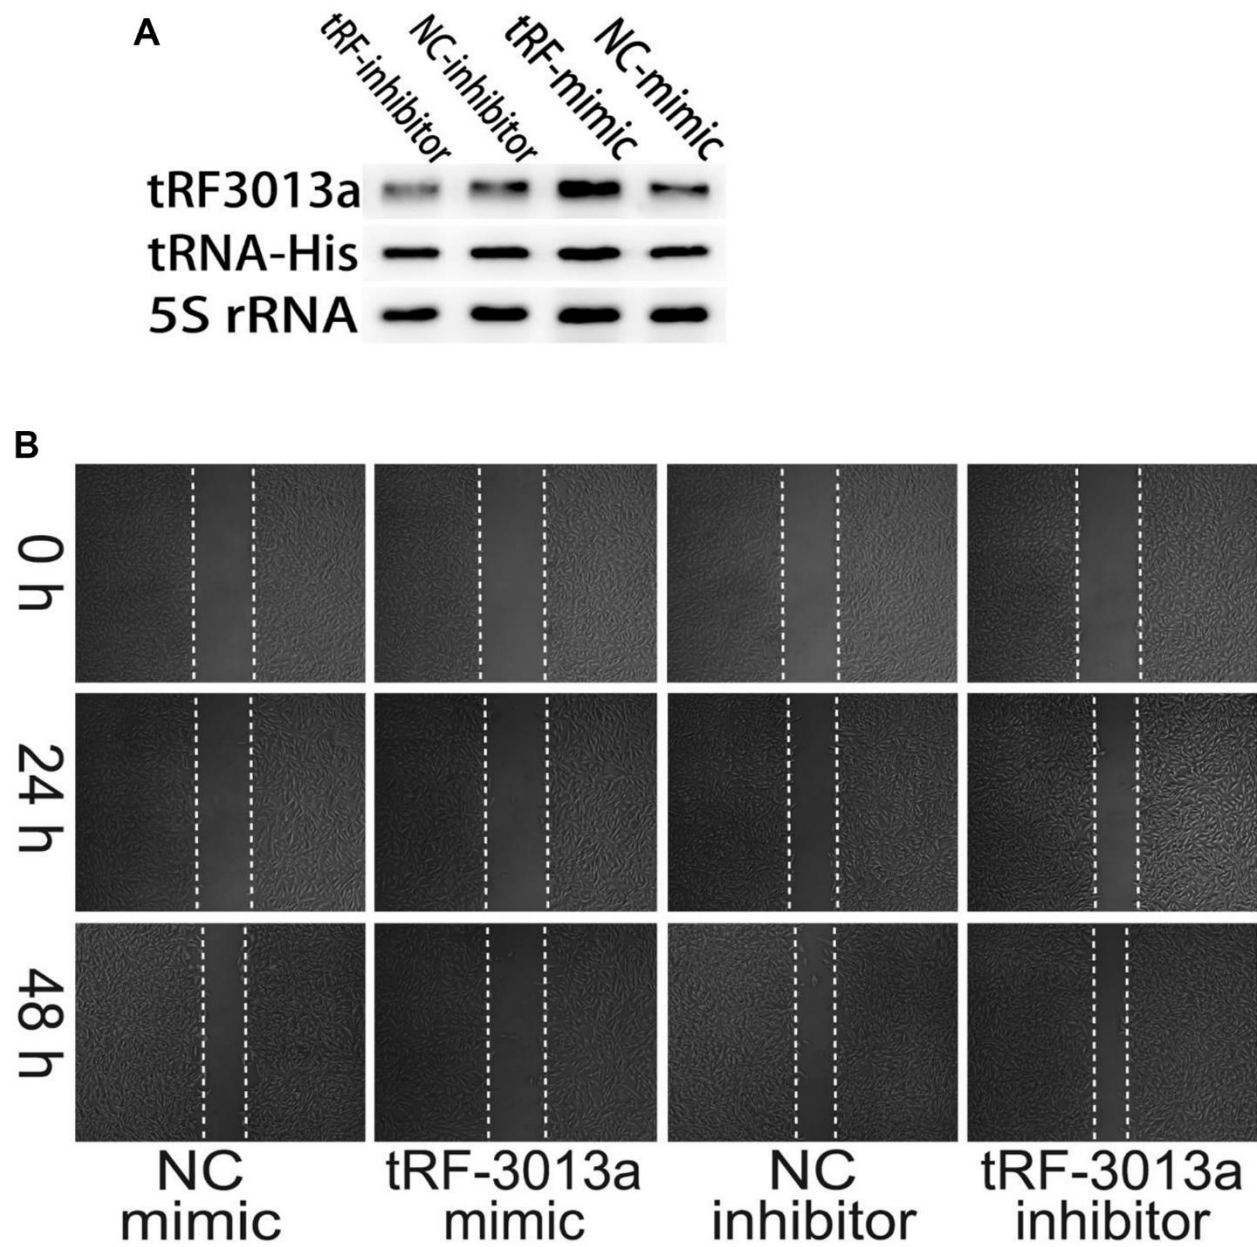

**Supplementary Figure 5.** (A) The Northern blotting analysis of tRFdb-3013a (tRF3013a, both  $P < 0.05$ ) and tRNA-His-GUG (tRNA-His) in the cells transfected with tRFdb-3013a mimic (tRF-mimic) or inhibitor (tRF-inhibitor) or negative controls (NC-mimic, NC-inhibitor). (B) Relative gap analysis scratch assay was used to assess the migration ability of SW480 cell.

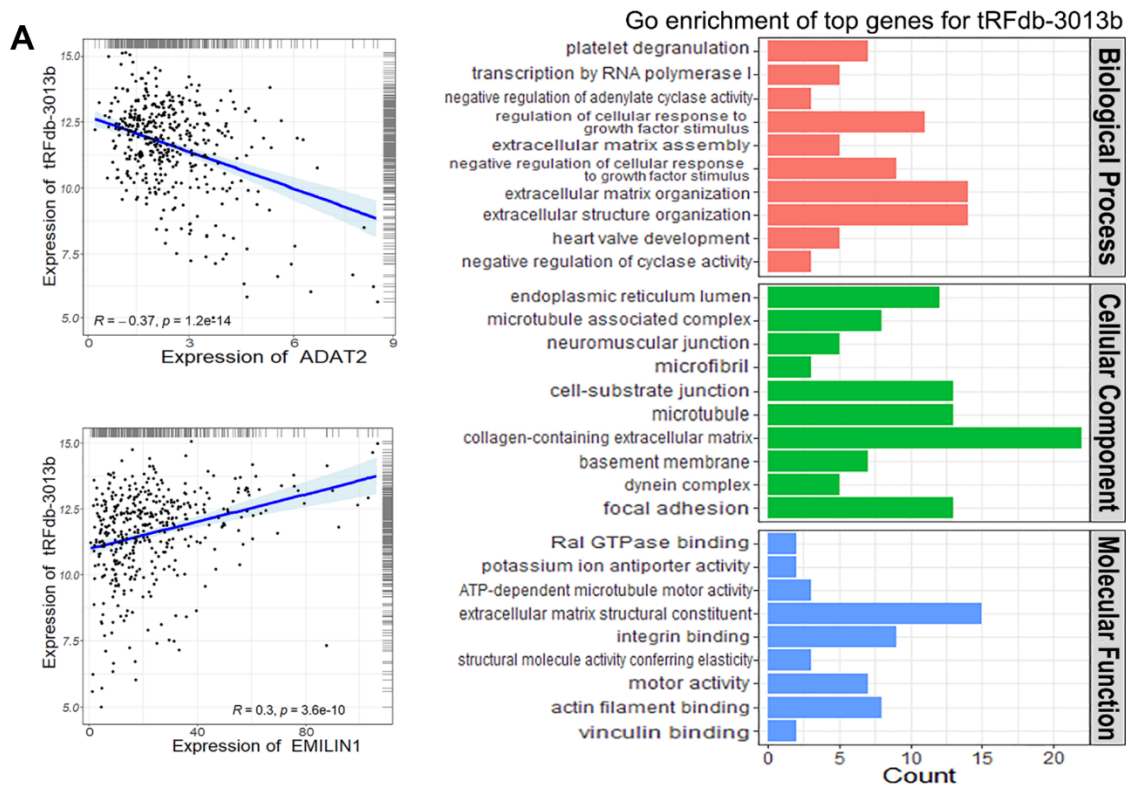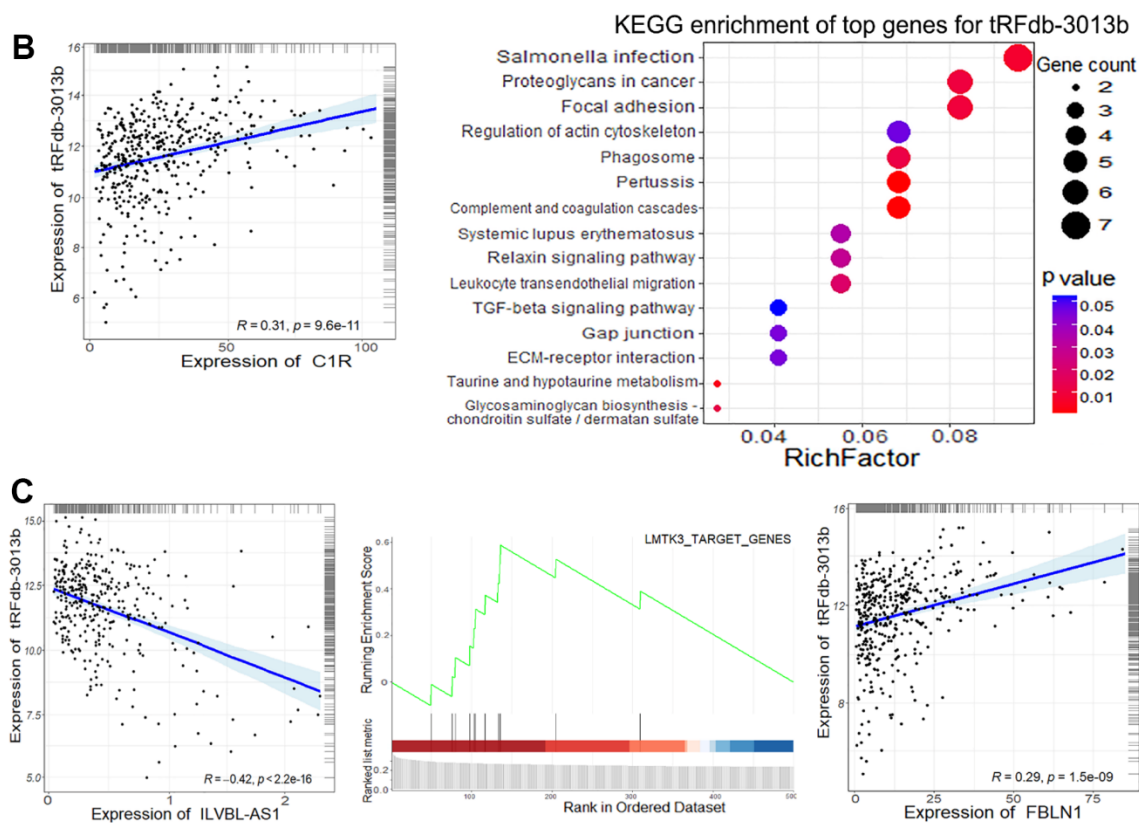

**Supplementary Figure 6. The enrichment analyses of tRFdb-3013b correlated-genes within TCGA-COAD datasets. (A)** The top gene ontology (GO) terms, including biological process, cellular component and molecular function. **(B)** The top KEGG pathway for tRFdb-3013b correlated-genes. The correlation scatter-plots of tRFdb-3013b and its correlated-genes (ADAT2, EMILIN1, and C1R). **(C)** GSEA (gene set enrichment analysis) plots of the molecular signatures, the scatter plots for tRFdb-3013b and its correlated-genes (ILVBL-AS1, FBLN1).

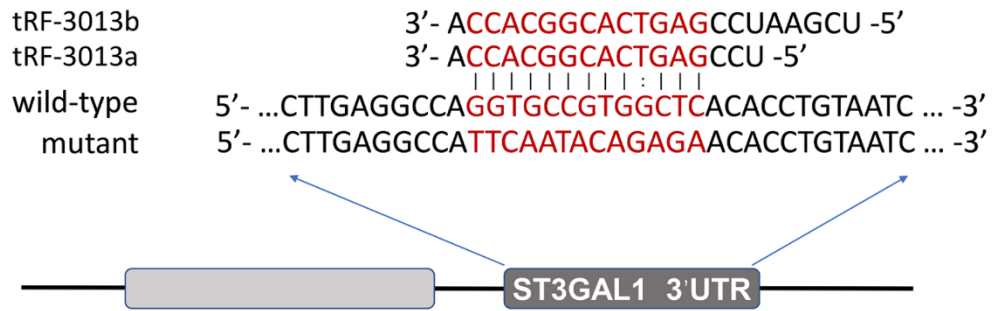

Supplementary Figure 7. Schematic diagram of the interaction position between tRFdb-3013a/b and the seed regions within the 3'UTR wide-type region and mutation region of ST3GAL1 gene in the luciferase reporter assay.

| <b>A</b> | tDRnamer ID                   | Fragment sequence             | length | MINTbase ID         | reads       | RPM   |
|----------|-------------------------------|-------------------------------|--------|---------------------|-------------|-------|
|          | tDR-61:76-His-GTG-1-M2        | CCGAGTCACGGCACCA              | 16     | tRF-16-308HP1B      | <b>541</b>  | 32.08 |
|          | <b>tDR-60:76-His-GTG-1-M2</b> | <b>TCCGAGTCACGGCACCA</b>      | 17     | tRF-17-8US5652      | <b>947</b>  | 72.07 |
|          | tDR-59:76-His-GTG-1-M2        | ATCCGAGTCACGGCACCA            | 18     | tRF-18-HS16MFD2     | <b>416</b>  | 18.58 |
|          | tDR-58:76-His-GTG-1-M2        | AATCCGAGTCACGGCACCA           | 19     | tRF-19-DR5MEJE2     | 49          | 6.998 |
|          | tDR-57:76-His-GTG-1-M2        | GAATCCGAGTCACGGCACCA          | 20     | tRF-20-OML32826     | 61          | 17.99 |
|          | tDR-56:76-His-GTG-1-M2        | CGAATCCGAGTCACGGCACCA         | 21     | tRF-21-LE308HP1B    | <b>321</b>  | 42.75 |
|          | tDR-60:75-His-GTG-1-M2        | TCCGAGTCACGGCACC -            | 16     | tRF-16-8US565D      | <b>162</b>  | 27.8  |
|          | tDR-59:75-His-GTG-1-M2        | ATCCGAGTCACGGCACC -           | 17     | tRF-17-HS16MFJ      | 7           | 3.955 |
|          | tDR-58:75-His-GTG-1-M2        | AATCCGAGTCACGGCACC -          | 18     |                     |             |       |
|          | tDR-57:75-His-GTG-1-M2        | GAATCCGAGTCACGGCACC -         | 19     | tRF-19-OML328FV     | 1           | 2.008 |
|          | tDR-56:75-His-GTG-1-M2        | CGAATCCGAGTCACGGCACC -        | 20     | tRF-20-LE308HP1     | 17          | 6.55  |
|          | tDR-60:74-His-GTG-1-M2        | TCCGAGTCACGGCAC --            | 15     |                     |             |       |
|          | tDR-59:74-His-GTG-1-M2        | ATCCGAGTCACGGCAC --           | 16     | tRF-16-HS16MFD      | 5           | 4.889 |
|          | tDR-58:74-His-GTG-1-M2        | AATCCGAGTCACGGCAC --          | 17     |                     |             |       |
|          | tDR-57:74-His-GTG-1-M2        | GAATCCGAGTCACGGCAC --         | 18     | tRF-18-OML328D1     | 1           | 1.176 |
|          | tDR-56:74-His-GTG-1-M2        | CGAATCCGAGTCACGGCAC --        | 19     | tRF-19-LE308HI1     | 3           | 5.345 |
|          | tDR-59:73-His-GTG-1-M2        | ATCCGAGTCACGGCA ---           | 15     |                     |             |       |
|          | tDR-58:73-His-GTG-1-M2        | AATCCGAGTCACGGCA ---          | 16     |                     |             |       |
|          | tDR-57:73-His-GTG-1-M2        | GAATCCGAGTCACGGCA ---         | 17     | tRF-17-OML3282      | 1           | 1.225 |
|          | tDR-56:73-His-GTG-1-M2        | CGAATCCGAGTCACGGCA ---        | 18     | tRF-18-LE308H DU    | 5           | 2.312 |
| <b>B</b> | tDRnamer ID                   | Fragment sequence             | length | MINTbase ID         | reads       | RPM   |
|          | <b>tDR-55:76-His-GTG-1-M2</b> | <b>TCGAATCCGAGTCACGGCACCA</b> | 22     | tRF-22-WB8US5652    | <b>6503</b> | 62.09 |
|          | tDR-54:76-His-GTG-1-M2        | TTCGAATCCGAGTCACGGCACCA       | 23     | tRF-23-YUHS16MFD2   | <b>100</b>  | 35.37 |
|          | tDR-53:76-His-GTG-1           | GTTTCGAATCCGAGTCACGGCACCA     | 24     | tRF-24-7SDR5MEJE2   | 86          | 14.38 |
|          | tDR-52:76-His-GTG-1           | GGTTCGAATCCGAGTCACGGCACCA     | 25     | tRF-25-R9OML32826   | 29          | 5.159 |
|          | tDR-51:76-His-GTG-1           | CGGTTTCGAATCCGAGTCACGGCACCA   | 26     | tRF-26-MNLE308HP1B  | 12          | 3.181 |
|          | tDR-50:76-His-GTG-1           | TCGGTTTCGAATCCGAGTCACGGCACCA  | 27     | tRF-28-48YUHS16MFD2 | 8           | 1.718 |
|          | tDR-55:75-His-GTG-1-M2        | TTCGAATCCGAGTCACGGCACC -      | 21     | tRF-21-WB8US565D    | <b>1541</b> | 16.82 |
|          | tDR-54:75-His-GTG-1-M2        | TTCGAATCCGAGTCACGGCACC -      | 22     | tRF-22-YUHS16MFJ    | 15          | 2.22  |
|          | tDR-53:75-His-GTG-1           | GTTTCGAATCCGAGTCACGGCACC -    | 23     | tRF-23-7SDR5MEJV    | 4           | 1.443 |
|          | tDR-52:75-His-GTG-1           | GGTTCGAATCCGAGTCACGGCACC -    | 24     |                     |             |       |
|          | tDR-51:75-His-GTG-1           | CGGTTTCGAATCCGAGTCACGGCACC -  | 25     |                     |             |       |
|          | tDR-50:75-His-GTG-1           | TCGGTTTCGAATCCGAGTCACGGCACC - | 26     |                     |             |       |
|          | tDR-55:74-His-GTG-1-M2        | TTCGAATCCGAGTCACGGCAC --      | 20     | tRF-20-WB8US565     | <b>113</b>  | 3.881 |
|          | tDR-54:74-His-GTG-1-M2        | TTCGAATCCGAGTCACGGCAC --      | 21     | tRF-21-YUHS16MFD    | 18          | 5.239 |
|          | tDR-53:74-His-GTG-1           | GTTTCGAATCCGAGTCACGGCAC --    | 22     | tRF-22-7SDR5MEJ1    | 5           | 2.81  |
|          | tDR-52:74-His-GTG-1           | GGTTCGAATCCGAGTCACGGCAC --    | 23     |                     |             |       |
|          | tDR-51:74-His-GTG-1           | CGGTTTCGAATCCGAGTCACGGCAC --  | 24     | tRF-24-MNLE308HI1   | 1           | 1.298 |
|          | tDR-50:74-His-GTG-1           | TCGGTTTCGAATCCGAGTCACGGCAC -- | 25     | tRF-26-48YUHS16MFD  | 5           | 18.6  |
|          | tDR-55:73-His-GTG-1-M2        | TTCGAATCCGAGTCACGGCA ---      | 19     | tRF-19-WB8US5IU     | 44          | 5.828 |
|          | tDR-54:73-His-GTG-1-M2        | TTCGAATCCGAGTCACGGCA ---      | 20     | tRF-20-YUHS16MF     | 25          | 12.33 |
|          | tDR-53:73-His-GTG-1           | GTTTCGAATCCGAGTCACGGCA ---    | 21     | tRF-21-7SDR5MEJB    | 14          | 10.81 |
|          | tDR-52:73-His-GTG-1           | GGTTCGAATCCGAGTCACGGCA ---    | 22     | tRF-22-R9OML3282    | 2           | 1.378 |
|          | tDR-51:73-His-GTG-1           | CGGTTTCGAATCCGAGTCACGGCA ---  | 23     | tRF-23-MNLE308H DU  | 1           | 1.608 |
|          | tDR-50:73-His-GTG-1           | TCGGTTTCGAATCCGAGTCACGGCA --- | 24     | tRF-25-48YUHS16MF   | 2           | 1.075 |

**Supplementary Figure 8.** Representative images of the tRFdb-3013a (A) or tRFdb-3013b (B) sequence alignments of some fragments derived tRNA-His-GTG from tRF fragments within tDRnamer and MINTbase v2.0.
