# Supplementary material for: The tsRNAs (tRFdb-3013a/b) serve as novel biomarkers for colon adenocarcinomas
Source: Aging (Albany NY). 2024 Mar 6;16(5):4299–326. doi: 10.18632/aging.205590 (PMC10968714; doi:10.18632/aging.205590)
Supplement: Supplementary Table 1 [file aging-16-205590-s003.xlsx]

## Sheet: Table S1
Supplementary Table 1. The primary clinical and molecular pathology characteristics parameters in the samples of TCGA-COAD datasets.
sample	patient	sample_type	primary_diagnosis	vital_status	days_to_death	days_to_last_follow_up	race	gender	age_at_index	prior_malignancy	ajcc_pathologic_t	ajcc_pathologic_n	ajcc_pathologic_m	paper_histological_type	paper_expression_subtype	paper_tumor_site	paper_MSI_status	paper_methylation_subtype	paper_MLH1_silencing	paper_hypermutated	paper_lymphatic_invasion_present	paper_vascular_invasion_present	paper_distant_metastasis_pathologic_spread	paper_history_of_colon_polyps
TCGA-F4-6569-01A	TCGA-F4-6569	Primary Tumor	Adenocarcinoma, NOS	Alive	NA	1087	white	male	60	no	T2	N0	M0	NA	NA	NA	NA	NA	NA	NA	NA	NA	NA	NA
TCGA-AA-3994-01A	TCGA-AA-3994	Primary Tumor	Mucinous adenocarcinoma	Alive	NA	822	not reported	male	69	no	T3	N1	M0	Colon Mucinous Adenocarcinoma	MSI/CIMP	2 - transverse colon	MSS	CIMP.H	0	0	NO	NO	M0	YES
TCGA-A6-6651-01A	TCGA-A6-6651	Primary Tumor	Adenocarcinoma, NOS	Alive	NA	662	white	female	55	no	T3	N1b	MX	NA	NA	NA	NA	NA	NA	NA	NA	NA	NA	NA
TCGA-F4-6805-01A	TCGA-F4-6805	Primary Tumor	Adenocarcinoma, NOS	Alive	NA	1047	white	female	58	no	T3	N0	M0	NA	NA	NA	NA	NA	NA	NA	NA	NA	NA	NA
TCGA-AM-5821-01A	TCGA-AM-5821	Primary Tumor	Adenocarcinoma, NOS	Alive	NA	28	white	female	68	no	T3	N0	M0	NA	NA	NA	NA	NA	NA	NA	NA	NA	NA	NA
TCGA-D5-6533-01A	TCGA-D5-6533	Primary Tumor	Adenocarcinoma, NOS	Alive	NA	775	white	female	68	no	T4b	N0	M0	NA	NA	NA	NA	NA	NA	NA	NA	NA	NA	NA
TCGA-AA-3681-01A	TCGA-AA-3681	Primary Tumor	Adenocarcinoma, NOS	Alive	NA	182	not reported	female	77	no	T3	N1	M0	Colon Adenocarcinoma	MSI/CIMP	1 - right colon	MSS	CIMP.L	0	0	NO	NO	M0	YES
TCGA-A6-5660-01A	TCGA-A6-5660	Primary Tumor	Adenocarcinoma, NOS	Alive	NA	888	black or african american	male	73	no	T3	N2b	M0	NA	NA	NA	NA	NA	NA	NA	NA	NA	NA	NA
TCGA-G4-6586-01A	TCGA-G4-6586	Primary Tumor	Adenocarcinoma, NOS	Alive	NA	1089	white	female	73	yes	T3	N0	M0	NA	NA	NA	NA	NA	NA	NA	NA	NA	NA	NA
TCGA-AA-3710-01A	TCGA-AA-3710	Primary Tumor	Adenocarcinoma, NOS	Alive	NA	821	not reported	female	80	no	T3	N0	M0	Colon Adenocarcinoma	MSI/CIMP	1 - right colon	MSI-H	CIMP.H	1	1	YES	NA	M0	NO
TCGA-CM-4748-01A	TCGA-CM-4748	Primary Tumor	Mucinous adenocarcinoma	Alive	NA	792	white	male	53	no	T4a	N1a	M0	Colon Adenocarcinoma	NA	2 - transverse colon	MSS	NA	NA	NA	YES	YES	M0	YES
TCGA-G4-6626-01A	TCGA-G4-6626	Primary Tumor	Adenocarcinoma, NOS	Dead	1	NA	white	male	90	no	T3	N0	M0	NA	NA	NA	NA	NA	NA	NA	NA	NA	NA	NA
TCGA-CM-5868-01A	TCGA-CM-5868	Primary Tumor	Adenocarcinoma, NOS	Alive	NA	518	white	female	59	no	T4a	N1a	M1a	NA	NA	NA	NA	NA	NA	NA	NA	NA	NA	NA
TCGA-A6-2684-01A	TCGA-A6-2684	Primary Tumor	Adenocarcinoma, NOS	Alive	NA	1127	white	female	75	no	T2	N0	M0	Colon Adenocarcinoma	NA	1 - right colon	MSI-L	NA	NA	NA	NO	NO	M0	YES
TCGA-AA-3864-01A	TCGA-AA-3864	Primary Tumor	Adenocarcinoma, NOS	Alive	NA	1612	not reported	male	71	no	T3	N0	M0	Colon Adenocarcinoma	MSI/CIMP	1 - right colon	MSI-H	Cluster3	0	1	NO	NO	M0	NO
TCGA-A6-5656-01A	TCGA-A6-5656	Primary Tumor	Adenocarcinoma, NOS	Alive	NA	1001	white	male	74	no	T2	N0	M0	NA	NA	NA	NA	NA	NA	NA	NA	NA	NA	NA
TCGA-AU-3779-01A	TCGA-AU-3779	Primary Tumor	Adenocarcinoma, NOS	Alive	NA	441	white	female	80	no	T3	N0	M0	NA	NA	NA	NA	NA	NA	NA	NA	NA	NA	NA
TCGA-A6-3807-01A	TCGA-A6-3807	Primary Tumor	Adenocarcinoma, NOS	Alive	NA	1054	white	female	53	no	T3	N2	M0	Colon Adenocarcinoma	MSI/CIMP	3 - left colon	MSS	Cluster4	0	0	YES	YES	M0	NO
TCGA-DM-A1HA-01A	TCGA-DM-A1HA	Primary Tumor	Adenocarcinoma, NOS	Alive	NA	2600	white	male	82	no	T3	N2	M0	NA	NA	NA	NA	NA	NA	NA	NA	NA	NA	NA
TCGA-CK-5914-01A	TCGA-CK-5914	Primary Tumor	Adenocarcinoma, NOS	Alive	NA	669	white	male	81	no	T3	N1	MX	NA	NA	NA	NA	NA	NA	NA	NA	NA	NA	NA
TCGA-AA-A029-01A	TCGA-AA-A029	Primary Tumor	Adenocarcinoma, NOS	Alive	NA	1581	not reported	male	67	no	T3	N0	M0	Colon Adenocarcinoma	Invasive	1 - right colon	MSI-L	CIMP.H	0	0	NA	NA	M0	YES
TCGA-DM-A1HB-01A	TCGA-DM-A1HB	Primary Tumor	Mucinous adenocarcinoma	Alive	NA	4126	white	male	75	no	T3	N1	M0	NA	NA	NA	NA	NA	NA	NA	NA	NA	NA	NA
TCGA-A6-2679-01A	TCGA-A6-2679	Primary Tumor	Adenocarcinoma, NOS	Alive	NA	1366	white	female	73	no	T3	N0	NA	Colon Adenocarcinoma	NA	1 - right colon	MSS	NA	NA	NA	NO	NO	NA	YES
TCGA-AA-3852-01A	TCGA-AA-3852	Primary Tumor	Mucinous adenocarcinoma	Dead	0	NA	not reported	male	88	no	T3	N0	M0	Colon Mucinous Adenocarcinoma	MSI/CIMP	2 - transverse colon	MSI-L	CIMP.L	0	0	YES	YES	M0	YES
TCGA-AA-3955-01A	TCGA-AA-3955	Primary Tumor	Adenocarcinoma, NOS	Alive	NA	638	not reported	male	38	no	T2	N2a	M0	Colon Adenocarcinoma	CIN	3 - left colon	MSS	Cluster4	0	0	YES	NO	M0	YES
TCGA-AZ-5403-01A	TCGA-AZ-5403	Primary Tumor	Adenocarcinoma, NOS	Dead	1910	NA	white	male	43	no	T3	N0	MX	NA	NA	NA	NA	NA	NA	NA	NA	NA	NA	NA
TCGA-AA-A01G-01A	TCGA-AA-A01G	Primary Tumor	Mucinous adenocarcinoma	Alive	NA	365	not reported	male	63	no	T3	N0	M0	Colon Mucinous Adenocarcinoma	Invasive	1 - right colon	MSI-L	CIMP.L	0	0	NO	NO	M0	NO
TCGA-CM-6163-01A	TCGA-CM-6163	Primary Tumor	Adenocarcinoma, NOS	Alive	NA	427	white	male	74	no	T1	N0	M0	NA	NA	NA	NA	NA	NA	NA	NA	NA	NA	NA
TCGA-AA-A00U-01A	TCGA-AA-A00U	Primary Tumor	Adenocarcinoma, NOS	Alive	NA	518	not reported	male	50	no	T3	N1	M0	Colon Adenocarcinoma	Invasive	1 - right colon	MSS	CIMP.L	0	0	NO	NO	M0	YES
TCGA-AA-3673-01A	TCGA-AA-3673	Primary Tumor	Adenocarcinoma, NOS	Alive	NA	1522	not reported	female	53	no	T3	N0	M0	Colon Adenocarcinoma	Invasive	2 - transverse colon	MSS	CIMP.L	0	0	NO	NO	M0	NO
TCGA-D5-6928-01A	TCGA-D5-6928	Primary Tumor	Mucinous adenocarcinoma	Alive	NA	354	white	male	80	no	T3	N0	M0	NA	NA	NA	NA	NA	NA	NA	NA	NA	NA	NA
TCGA-A6-A565-01A	TCGA-A6-A565	Primary Tumor	Mucinous adenocarcinoma	Dead	494	NA	black or african american	female	34	no	T3	N2	MX	NA	NA	NA	NA	NA	NA	NA	NA	NA	NA	NA
TCGA-AA-3973-01A	TCGA-AA-3973	Primary Tumor	Adenocarcinoma, NOS	Alive	NA	397	not reported	male	69	no	T4	N1	M1	Colon Adenocarcinoma	CIN	3 - left colon	MSI-L	Cluster4	0	0	YES	YES	M1	NO
TCGA-AA-3861-01A	TCGA-AA-3861	Primary Tumor	Adenocarcinoma, NOS	Alive	NA	914	not reported	male	72	no	T3	N0	M0	Colon Adenocarcinoma	Invasive	1 - right colon	MSI-L	CIMP.L	0	NA	YES	YES	M0	NO
TCGA-DM-A1D6-01A	TCGA-DM-A1D6	Primary Tumor	Mucinous adenocarcinoma	Dead	570	570	white	male	88	no	T3	N0	M0	NA	NA	NA	NA	NA	NA	NA	NA	NA	NA	NA
TCGA-AA-3524-01A	TCGA-AA-3524	Primary Tumor	Adenocarcinoma, NOS	Alive	NA	1096	not reported	male	85	yes	T3	N0	M0	Colon Adenocarcinoma	Invasive	3 - left colon	MSS	Cluster4	0	0	NO	NO	M0	YES
TCGA-CM-6677-01A	TCGA-CM-6677	Primary Tumor	Adenocarcinoma, NOS	Alive	NA	337	white	female	75	no	T3	N0	M0	NA	NA	NA	NA	NA	NA	NA	NA	NA	NA	NA
TCGA-DM-A288-01A	TCGA-DM-A288	Primary Tumor	Mucinous adenocarcinoma	Dead	427	427	white	male	68	no	T3	N2	M0	NA	NA	NA	NA	NA	NA	NA	NA	NA	NA	NA
TCGA-A6-2675-01A	TCGA-A6-2675	Primary Tumor	Adenocarcinoma, NOS	Alive	NA	1321	white	male	78	no	T3	N0	MX	NA	NA	NA	NA	NA	NA	NA	NA	NA	NA	NA
TCGA-AZ-6601-01A	TCGA-AZ-6601	Primary Tumor	Adenocarcinoma, NOS	Dead	3042	NA	white	male	68	yes	T3	N0	M0	NA	NA	NA	NA	NA	NA	NA	NA	NA	NA	NA
TCGA-A6-5665-01A	TCGA-A6-5665	Primary Tumor	Adenocarcinoma, NOS	Alive	NA	671	white	female	84	no	T3	N0	M0	NA	NA	NA	NA	NA	NA	NA	NA	NA	NA	NA
TCGA-AA-3544-01A	TCGA-AA-3544	Primary Tumor	Adenocarcinoma, NOS	Alive	NA	426	not reported	male	68	no	T2	N0	M0	Colon Adenocarcinoma	CIN	3 - left colon	MSS	Cluster3	0	0	NO	NO	M0	NO
TCGA-AA-3558-01A	TCGA-AA-3558	Primary Tumor	Adenocarcinoma, NOS	Alive	NA	638	not reported	male	70	no	T2	N0	M0	NA	NA	NA	NA	NA	NA	NA	NA	NA	NA	NA
TCGA-AD-6965-01A	TCGA-AD-6965	Primary Tumor	Adenocarcinoma, NOS	Alive	NA	805	white	male	62	no	T4a	N2b	M0	NA	NA	NA	NA	NA	NA	NA	NA	NA	NA	NA
TCGA-AA-3662-01A	TCGA-AA-3662	Primary Tumor	Adenocarcinoma, NOS	Alive	NA	184	not reported	female	80	yes	T4	N2	M1	NA	NA	NA	NA	NA	NA	NA	NA	NA	NA	NA
TCGA-AA-3693-01A	TCGA-AA-3693	Primary Tumor	Adenocarcinoma, NOS	Alive	NA	0	not reported	female	77	no	T4	N1	M1	Colon Adenocarcinoma	CIN	3 - left colon	MSS	Cluster4	0	0	YES	NO	M1	NO
TCGA-AA-3552-01A	TCGA-AA-3552	Primary Tumor	Adenocarcinoma, NOS	Dead	396	0	not reported	male	85	yes	T3	N2	M0	Colon Adenocarcinoma	Invasive	1 - right colon	MSS	Cluster3	0	0	YES	NO	M0	NO
TCGA-AA-3862-01A	TCGA-AA-3862	Primary Tumor	Adenocarcinoma, NOS	Alive	NA	914	not reported	male	82	yes	T3	N0	M0	Colon Adenocarcinoma	Invasive	2 - transverse colon	MSS	Cluster4	0	NA	YES	NA	M0	NO
TCGA-AA-3869-01A	TCGA-AA-3869	Primary Tumor	Adenocarcinoma, NOS	Dead	822	0	not reported	male	76	no	T4	N2	M1	Colon Adenocarcinoma	Invasive	1 - right colon	MSS	Cluster4	0	0	YES	NO	M1	NO
TCGA-CK-4952-01A	TCGA-CK-4952	Primary Tumor	Mucinous adenocarcinoma	Alive	NA	475	white	female	48	no	T4	N2	M0	NA	NA	NA	NA	NA	NA	NA	NA	NA	NA	NA
TCGA-DM-A28A-01A	TCGA-DM-A28A	Primary Tumor	Adenocarcinoma, NOS	Dead	805	805	white	male	78	no	T3	N2	M0	NA	NA	NA	NA	NA	NA	NA	NA	NA	NA	NA
TCGA-CK-5912-01A	TCGA-CK-5912	Primary Tumor	Adenocarcinoma, NOS	Dead	1493	1466	white	male	81	yes	T2	N0	MX	NA	NA	NA	NA	NA	NA	NA	NA	NA	NA	NA
TCGA-AA-3713-01A	TCGA-AA-3713	Primary Tumor	Adenocarcinoma, NOS	Alive	NA	579	not reported	male	68	yes	T3	N0	M1	NA	NA	NA	NA	NA	NA	NA	NA	NA	NA	NA
TCGA-AA-3530-01A	TCGA-AA-3530	Primary Tumor	Adenocarcinoma, NOS	Alive	NA	580	not reported	male	80	yes	T2	N0	M0	Colon Adenocarcinoma	CIN	1 - right colon	MSS	Cluster4	0	0	NO	NO	M0	YES
TCGA-AA-A00L-01A	TCGA-AA-A00L	Primary Tumor	Adenocarcinoma, NOS	Alive	NA	1157	not reported	male	66	yes	T3	N0	M0	Colon Adenocarcinoma	CIN	2 - transverse colon	MSS	Cluster3	0	0	NO	NO	M0	YES
TCGA-G4-6311-01A	TCGA-G4-6311	Primary Tumor	Adenocarcinoma, NOS	Alive	NA	1199	white	male	80	no	T3	N1	MX	NA	NA	NA	NA	NA	NA	NA	NA	NA	NA	NA
TCGA-CM-6167-01A	TCGA-CM-6167	Primary Tumor	Adenocarcinoma, NOS	Alive	NA	456	black or african american	female	57	no	T3	N2b	M0	NA	NA	NA	NA	NA	NA	NA	NA	NA	NA	NA
TCGA-A6-2672-01B	TCGA-A6-2672	Primary Tumor	Adenocarcinoma, NOS	Alive	NA	1419	white	female	82	no	T3	N1	M0	Colon Adenocarcinoma	MSI/CIMP	2 - transverse colon	MSI-H	CIMP.H	1	1	YES	YES	M0	YES
TCGA-AA-3815-01A	TCGA-AA-3815	Primary Tumor	Adenocarcinoma, NOS	Alive	NA	1005	not reported	female	65	no	T3	N0	M0	Colon Adenocarcinoma	MSI/CIMP	1 - right colon	MSI-H	CIMP.H	1	NA	YES	NA	M0	NO
TCGA-AA-A01R-01A	TCGA-AA-A01R	Primary Tumor	Mucinous adenocarcinoma	Alive	NA	1065	not reported	male	47	no	T3	N2	M0	Colon Mucinous Adenocarcinoma	NA	1 - right colon	MSI-H	CIMP.L	0	1	YES	NA	M0	NO
TCGA-G4-6295-01A	TCGA-G4-6295	Primary Tumor	Adenocarcinoma, NOS	Alive	NA	254	white	female	70	no	T3	N0	M0	NA	NA	NA	NA	NA	NA	NA	NA	NA	NA	NA
TCGA-D5-5541-01A	TCGA-D5-5541	Primary Tumor	Adenocarcinoma, NOS	Alive	NA	1701	white	male	63	no	T3	N1a	M0	NA	NA	NA	NA	NA	NA	NA	NA	NA	NA	NA
TCGA-AA-3712-01A	TCGA-AA-3712	Primary Tumor	Adenocarcinoma, NOS	Alive	NA	0	not reported	male	65	no	T3	N2	M0	NA	NA	NA	NA	NA	NA	NA	NA	NA	NA	NA
TCGA-CA-6716-01A	TCGA-CA-6716	Primary Tumor	Papillary adenocarcinoma, NOS	Alive	NA	371	asian	male	65	no	T3	N0	M0	NA	NA	NA	NA	NA	NA	NA	NA	NA	NA	NA
TCGA-DM-A28H-01A	TCGA-DM-A28H	Primary Tumor	Adenocarcinoma, NOS	Alive	NA	3561	white	male	50	no	T3	N2	M0	NA	NA	NA	NA	NA	NA	NA	NA	NA	NA	NA
TCGA-CA-5797-01A	TCGA-CA-5797	Primary Tumor	Adenocarcinoma, NOS	Alive	NA	383	asian	male	56	no	T3	N0	M0	NA	NA	NA	NA	NA	NA	NA	NA	NA	NA	NA
TCGA-AD-6901-01A	TCGA-AD-6901	Primary Tumor	Adenocarcinoma, NOS	Dead	682	31	white	male	78	no	T3	N0	MX	NA	NA	NA	NA	NA	NA	NA	NA	NA	NA	NA
TCGA-A6-3810-01A	TCGA-A6-3810	Primary Tumor	Adenocarcinoma, NOS	Alive	NA	1111	white	male	62	no	T3	N0	M0	Colon Adenocarcinoma	MSI/CIMP	3 - left colon	MSS	Cluster4	0	0	NO	NO	M0	YES
TCGA-4T-AA8H-01A	TCGA-4T-AA8H	Primary Tumor	Mucinous adenocarcinoma	Alive	NA	385	black or african american	female	42	no	T3	N0	MX	NA	NA	NA	NA	NA	NA	NA	NA	NA	NA	NA
TCGA-CK-5916-01A	TCGA-CK-5916	Primary Tumor	Adenocarcinoma, NOS	Dead	643	NA	white	female	71	no	T1	N0	M0	NA	NA	NA	NA	NA	NA	NA	NA	NA	NA	NA
TCGA-A6-6653-01A	TCGA-A6-6653	Primary Tumor	Adenocarcinoma, NOS	Alive	NA	742	white	male	82	no	T2	N0	M0	NA	NA	NA	NA	NA	NA	NA	NA	NA	NA	NA
TCGA-A6-6781-01A	TCGA-A6-6781	Primary Tumor	Mucinous adenocarcinoma	Alive	NA	598	white	male	43	no	T4b	N1b	MX	NA	NA	NA	NA	NA	NA	NA	NA	NA	NA	NA
TCGA-A6-6781-01B	TCGA-A6-6781	Primary Tumor	Mucinous adenocarcinoma	Alive	NA	598	white	male	43	no	T4b	N1b	MX	NA	NA	NA	NA	NA	NA	NA	NA	NA	NA	NA
TCGA-AA-3527-01A	TCGA-AA-3527	Primary Tumor	Adenocarcinoma, NOS	Alive	NA	0	not reported	female	90	yes	T3	N0	M0	Colon Adenocarcinoma	CIN	1 - right colon	MSS	CIMP.L	0	0	NO	NO	M0	YES
TCGA-AA-3527-11A	TCGA-AA-3527	Solid Tissue Normal	Adenocarcinoma, NOS	Alive	NA	0	not reported	female	90	yes	T3	N0	M0	NA	NA	NA	NA	NA	NA	NA	NA	NA	NA	NA
TCGA-AA-A01P-01A	TCGA-AA-A01P	Primary Tumor	Adenocarcinoma, NOS	Dead	1158	0	not reported	female	80	no	T3	N1	M0	Colon Adenocarcinoma	NA	1 - right colon	MSI-H	CIMP.H	1	1	YES	NA	M0	NO
TCGA-D5-6536-01A	TCGA-D5-6536	Primary Tumor	Adenocarcinoma, NOS	Alive	NA	543	white	male	73	no	T3	N0	M0	NA	NA	NA	NA	NA	NA	NA	NA	NA	NA	NA
TCGA-A6-2680-11A	TCGA-A6-2680	Solid Tissue Normal	Adenocarcinoma, NOS	Alive	NA	1068	black or african american	female	72	no	T3	N0	M0	NA	NA	NA	NA	NA	NA	NA	NA	NA	NA	NA
TCGA-A6-2680-01A	TCGA-A6-2680	Primary Tumor	Adenocarcinoma, NOS	Alive	NA	1068	black or african american	female	72	no	T3	N0	M0	Colon Adenocarcinoma	NA	1 - right colon	MSS	NA	NA	NA	NO	NO	M0	NA
TCGA-F4-6461-01A	TCGA-F4-6461	Primary Tumor	Adenocarcinoma, NOS	Dead	338	0	white	female	41	no	T4b	N2	M0	NA	NA	NA	NA	NA	NA	NA	NA	NA	NA	NA
TCGA-D5-6529-01A	TCGA-D5-6529	Primary Tumor	Adenocarcinoma, NOS	Alive	NA	614	white	male	69	no	T3	N0	M0	NA	NA	NA	NA	NA	NA	NA	NA	NA	NA	NA
TCGA-QG-A5YV-01A	TCGA-QG-A5YV	Primary Tumor	Adenocarcinoma, NOS	Alive	NA	1301	black or african american	female	64	no	T4b	N1a	MX	NA	NA	NA	NA	NA	NA	NA	NA	NA	NA	NA
TCGA-AA-3532-01A	TCGA-AA-3532	Primary Tumor	Adenocarcinoma, NOS	Alive	NA	882	not reported	male	63	no	T3	N0	M0	Colon Adenocarcinoma	MSI/CIMP	3 - left colon	MSS	Cluster4	0	0	NO	NO	M0	NO
TCGA-D5-6541-01A	TCGA-D5-6541	Primary Tumor	Adenocarcinoma, NOS	Alive	NA	474	white	male	49	no	T3	N0	M0	NA	NA	NA	NA	NA	NA	NA	NA	NA	NA	NA
TCGA-AA-3877-01A	TCGA-AA-3877	Primary Tumor	Mucinous adenocarcinoma	Alive	NA	943	not reported	female	83	no	T1	N0	M0	Colon Mucinous Adenocarcinoma	MSI/CIMP	2 - transverse colon	MSI-H	CIMP.H	1	1	NO	NO	M0	YES
TCGA-D5-6920-01A	TCGA-D5-6920	Primary Tumor	Adenocarcinoma, NOS	Alive	NA	377	white	female	77	no	T3	N0	M0	NA	NA	NA	NA	NA	NA	NA	NA	NA	NA	NA
TCGA-A6-2684-11A	TCGA-A6-2684	Solid Tissue Normal	Adenocarcinoma, NOS	Alive	NA	1127	white	female	75	no	T2	N0	M0	NA	NA	NA	NA	NA	NA	NA	NA	NA	NA	NA
TCGA-G4-6294-01A	TCGA-G4-6294	Primary Tumor	Adenocarcinoma, NOS	Dead	858	NA	white	male	75	yes	T3	N1	M1	NA	NA	NA	NA	NA	NA	NA	NA	NA	NA	NA
TCGA-D5-6540-01A	TCGA-D5-6540	Primary Tumor	Mucinous adenocarcinoma	Alive	NA	491	white	male	66	no	T2	N0	M0	NA	NA	NA	NA	NA	NA	NA	NA	NA	NA	NA
TCGA-F4-6704-01A	TCGA-F4-6704	Primary Tumor	Mucinous adenocarcinoma	Alive	NA	47	american indian or alaska native	male	60	no	T3	N2b	MX	NA	NA	NA	NA	NA	NA	NA	NA	NA	NA	NA
TCGA-A6-2678-01A	TCGA-A6-2678	Primary Tumor	Adenocarcinoma, NOS	Alive	NA	1286	white	female	43	no	T3	N1	M0	Colon Adenocarcinoma	Invasive	2 - transverse colon	MSS	Cluster3	0	0	YES	NO	M0	NO
TCGA-CM-6172-01A	TCGA-CM-6172	Primary Tumor	Adenocarcinoma, NOS	Alive	NA	335	white	female	70	no	T3	N1a	M0	NA	NA	NA	NA	NA	NA	NA	NA	NA	NA	NA
TCGA-AZ-6606-01A	TCGA-AZ-6606	Primary Tumor	Adenocarcinoma, NOS	Dead	357	NA	white	male	81	no	T4	N2	M1	NA	NA	NA	NA	NA	NA	NA	NA	NA	NA	NA
TCGA-NH-A6GA-01A	TCGA-NH-A6GA	Primary Tumor	Adenocarcinoma, NOS	Dead	302	182	black or african american	male	58	no	T4a	N2a	MX	NA	NA	NA	NA	NA	NA	NA	NA	NA	NA	NA
TCGA-D5-6929-01A	TCGA-D5-6929	Primary Tumor	Adenocarcinoma, NOS	Alive	NA	408	white	female	49	no	T3	N1	M1	NA	NA	NA	NA	NA	NA	NA	NA	NA	NA	NA
TCGA-D5-6930-01A	TCGA-D5-6930	Primary Tumor	Mucinous adenocarcinoma	Alive	NA	406	white	male	67	no	T3	N0	M0	NA	NA	NA	NA	NA	NA	NA	NA	NA	NA	NA
TCGA-AA-3851-01A	TCGA-AA-3851	Primary Tumor	Adenocarcinoma, NOS	Alive	NA	1006	not reported	male	74	no	T3	N0	M0	Colon Adenocarcinoma	Invasive	1 - right colon	MSS	Cluster3	0	0	YES	YES	M0	YES
TCGA-AA-3939-01A	TCGA-AA-3939	Primary Tumor	Adenocarcinoma, NOS	Alive	NA	395	not reported	male	83	yes	T3	N0	M0	Colon Adenocarcinoma	Invasive	1 - right colon	MSS	Cluster3	0	0	NO	NO	M0	YES
TCGA-A6-6648-01A	TCGA-A6-6648	Primary Tumor	Adenocarcinoma, NOS	Alive	NA	766	white	male	56	no	T3	N0	M1a	NA	NA	NA	NA	NA	NA	NA	NA	NA	NA	NA
TCGA-AA-3972-01A	TCGA-AA-3972	Primary Tumor	Adenocarcinoma, NOS	Alive	NA	1551	not reported	male	72	yes	T3	N1	M1	Colon Adenocarcinoma	CIN	3 - left colon	MSI-L	CIMP.L	0	0	NO	NO	M1	NO
TCGA-A6-2677-01A	TCGA-A6-2677	Primary Tumor	Adenocarcinoma, NOS	Dead	740	541	white	female	68	yes	T3	N2	M0	Colon Adenocarcinoma	CIN	1 - right colon	MSS	Cluster3	0	0	YES	NO	M0	NO
TCGA-CM-6170-01A	TCGA-CM-6170	Primary Tumor	Adenocarcinoma, NOS	Alive	NA	457	white	female	73	no	T2	N0	M0	NA	NA	NA	NA	NA	NA	NA	NA	NA	NA	NA
TCGA-AA-3860-01A	TCGA-AA-3860	Primary Tumor	Adenocarcinoma, NOS	Alive	NA	945	not reported	female	53	yes	T3	N1	M0	Colon Adenocarcinoma	MSI/CIMP	3 - left colon	MSS	Cluster4	0	0	YES	YES	M0	YES
TCGA-A6-5665-01B	TCGA-A6-5665	Primary Tumor	Adenocarcinoma, NOS	Alive	NA	671	white	female	84	no	T3	N0	M0	NA	NA	NA	NA	NA	NA	NA	NA	NA	NA	NA
TCGA-AA-3819-01A	TCGA-AA-3819	Primary Tumor	Adenocarcinoma, NOS	Alive	NA	761	not reported	female	41	no	T3	N0	M0	Colon Adenocarcinoma	CIN	3 - left colon	MSI-L	Cluster3	0	0	YES	YES	M0	NO
TCGA-AA-3489-01A	TCGA-AA-3489	Primary Tumor	Adenocarcinoma, NOS	Dead	214	31	not reported	male	75	no	T3	N0	M0	NA	NA	NA	NA	NA	NA	NA	NA	NA	NA	NA
TCGA-AA-3812-01A	TCGA-AA-3812	Primary Tumor	Adenocarcinoma, NOS	Alive	NA	1066	not reported	female	82	no	T3	N0	M0	Colon Adenocarcinoma	MSI/CIMP	3 - left colon	MSS	Cluster4	0	0	YES	NA	M0	NO
TCGA-AA-3975-01A	TCGA-AA-3975	Primary Tumor	Adenocarcinoma, NOS	Alive	NA	1036	not reported	male	80	no	T2	N0	M0	Colon Adenocarcinoma	CIN	3 - left colon	MSS	Cluster4	0	0	NO	NO	M0	NO
TCGA-AY-A54L-01A	TCGA-AY-A54L	Primary Tumor	Adenocarcinoma, NOS	Alive	NA	525	black or african american	female	74	no	T2	N0	M0	NA	NA	NA	NA	NA	NA	NA	NA	NA	NA	NA
TCGA-CM-5344-01A	TCGA-CM-5344	Primary Tumor	Adenocarcinoma, NOS	Alive	NA	670	white	female	39	no	T3	N1b	M0	NA	NA	NA	NA	NA	NA	NA	NA	NA	NA	NA
TCGA-AA-3850-01A	TCGA-AA-3850	Primary Tumor	Adenocarcinoma, NOS	Dead	0	NA	not reported	male	74	no	T2	N0	M0	Colon Adenocarcinoma	Invasive	2 - transverse colon	MSS	CIMP.L	0	0	YES	NA	M0	YES
TCGA-A6-5659-01A	TCGA-A6-5659	Primary Tumor	Adenocarcinoma, NOS	Alive	NA	926	white	male	82	no	T2	N0	M0	NA	NA	NA	NA	NA	NA	NA	NA	NA	NA	NA
TCGA-AA-3950-01A	TCGA-AA-3950	Primary Tumor	Mucinous adenocarcinoma	Alive	NA	730	not reported	female	79	yes	T3	N0	M0	Colon Mucinous Adenocarcinoma	MSI/CIMP	1 - right colon	MSI-H	CIMP.H	1	NA	NO	NO	M0	NO
TCGA-F4-6460-01A	TCGA-F4-6460	Primary Tumor	Adenocarcinoma, NOS	Dead	972	407	white	female	51	no	T3	N1	M0	NA	NA	NA	NA	NA	NA	NA	NA	NA	NA	NA
TCGA-AA-3520-11A	TCGA-AA-3520	Solid Tissue Normal	Adenocarcinoma, NOS	Alive	NA	731	not reported	female	86	yes	T3	N0	M0	NA	NA	NA	NA	NA	NA	NA	NA	NA	NA	NA
TCGA-AA-3856-01A	TCGA-AA-3856	Primary Tumor	Adenocarcinoma, NOS	Alive	NA	30	not reported	male	59	no	T3	N0	M0	Colon Adenocarcinoma	Invasive	3 - left colon	MSS	Cluster4	0	0	YES	YES	M0	YES
TCGA-AA-3956-01A	TCGA-AA-3956	Primary Tumor	Adenocarcinoma, NOS	Alive	NA	1035	not reported	male	65	no	T3	N0	M0	Colon Adenocarcinoma	CIN	1 - right colon	MSS	Cluster3	0	0	NO	NO	M0	YES
TCGA-AA-3520-01A	TCGA-AA-3520	Primary Tumor	Adenocarcinoma, NOS	Alive	NA	731	not reported	female	86	yes	T3	N0	M0	Colon Adenocarcinoma	Invasive	1 - right colon	MSI-L	Cluster3	0	0	NO	NO	M0	YES
TCGA-AA-3514-01A	TCGA-AA-3514	Primary Tumor	Adenocarcinoma, NOS	Alive	NA	31	not reported	female	81	no	T2	N0	M0	Colon Adenocarcinoma	MSI/CIMP	1 - right colon	MSS	Cluster3	0	0	NO	NO	M0	YES
TCGA-AZ-6599-01A	TCGA-AZ-6599	Primary Tumor	Adenocarcinoma, NOS	Dead	206	NA	white	male	72	no	T2	N0	MX	NA	NA	NA	NA	NA	NA	NA	NA	NA	NA	NA
TCGA-G4-6628-01A	TCGA-G4-6628	Primary Tumor	Adenocarcinoma, NOS	Alive	NA	2424	white	male	78	yes	T2	N0	M0	NA	NA	NA	NA	NA	NA	NA	NA	NA	NA	NA
TCGA-A6-2671-01A	TCGA-A6-2671	Primary Tumor	Adenocarcinoma, NOS	Dead	1331	1126	white	male	85	no	T3	N2	M1	Colon Adenocarcinoma	NA	3 - left colon	MSS	NA	NA	NA	YES	YES	M1	YES
TCGA-D5-6926-01A	TCGA-D5-6926	Primary Tumor	Adenocarcinoma, NOS	Alive	NA	275	white	male	65	no	T4a	N1	M0	NA	NA	NA	NA	NA	NA	NA	NA	NA	NA	NA
TCGA-A6-2685-01A	TCGA-A6-2685	Primary Tumor	Adenocarcinoma, NOS	Alive	NA	1133	black or african american	female	48	no	T3	N0	M0	Colon Adenocarcinoma	NA	3 - left colon	MSS	NA	NA	NA	NO	NO	M0	NA
TCGA-AA-3688-01A	TCGA-AA-3688	Primary Tumor	Adenocarcinoma, NOS	Alive	NA	578	not reported	male	80	yes	T3	N1	M1	Colon Adenocarcinoma	CIN	3 - left colon	MSI-L	Cluster4	0	0	YES	NO	M1	NO
TCGA-A6-6650-01A	TCGA-A6-6650	Primary Tumor	Adenocarcinoma, NOS	Alive	NA	627	black or african american	female	69	no	T3	N0	M0	NA	NA	NA	NA	NA	NA	NA	NA	NA	NA	NA
TCGA-A6-6780-01A	TCGA-A6-6780	Primary Tumor	Mucinous adenocarcinoma	Alive	NA	612	white	male	74	no	T3	N0	MX	NA	NA	NA	NA	NA	NA	NA	NA	NA	NA	NA
TCGA-AA-3511-01A	TCGA-AA-3511	Primary Tumor	Adenocarcinoma, NOS	Alive	NA	212	not reported	male	64	no	T4	N0	M0	NA	NA	NA	NA	NA	NA	NA	NA	NA	NA	NA
TCGA-AA-3664-01A	TCGA-AA-3664	Primary Tumor	Adenocarcinoma, NOS	Alive	NA	1643	not reported	female	74	no	T3	N0	M0	Colon Adenocarcinoma	MSI/CIMP	1 - right colon	MSS	CIMP.H	1	0	NO	NO	M0	NO
TCGA-DM-A28M-01A	TCGA-DM-A28M	Primary Tumor	Adenocarcinoma, NOS	Alive	NA	2895	white	male	63	no	T3	N0	M0	NA	NA	NA	NA	NA	NA	NA	NA	NA	NA	NA
TCGA-DM-A1DB-01A	TCGA-DM-A1DB	Primary Tumor	Adenocarcinoma, NOS	Dead	1348	1348	white	male	68	no	T3	N0	M0	NA	NA	NA	NA	NA	NA	NA	NA	NA	NA	NA
TCGA-AA-A00J-01A	TCGA-AA-A00J	Primary Tumor	Mucinous adenocarcinoma	Alive	NA	549	not reported	male	80	no	T4	N1	M0	Colon Mucinous Adenocarcinoma	MSI/CIMP	1 - right colon	MSI-H	CIMP.H	1	1	YES	NO	M0	YES
TCGA-AD-6548-01A	TCGA-AD-6548	Primary Tumor	Adenocarcinoma, NOS	Alive	NA	650	white	female	81	no	T2	N0	M0	NA	NA	NA	NA	NA	NA	NA	NA	NA	NA	NA
TCGA-G4-6588-01A	TCGA-G4-6588	Primary Tumor	Adenocarcinoma, NOS	Alive	NA	796	white	female	58	yes	T3	N0	M0	NA	NA	NA	NA	NA	NA	NA	NA	NA	NA	NA
TCGA-SS-A7HO-01A	TCGA-SS-A7HO	Primary Tumor	Adenocarcinoma, NOS	Alive	NA	1829	black or african american	female	44	no	T4a	N0	M0	NA	NA	NA	NA	NA	NA	NA	NA	NA	NA	NA
TCGA-AD-A5EK-01A	TCGA-AD-A5EK	Primary Tumor	Adenocarcinoma, NOS	Alive	NA	500	black or african american	male	51	no	T2	N0	MX	NA	NA	NA	NA	NA	NA	NA	NA	NA	NA	NA
TCGA-A6-5666-01A	TCGA-A6-5666	Primary Tumor	Adenocarcinoma, NOS	Alive	NA	995	white	male	78	no	T4b	N0	M0	NA	NA	NA	NA	NA	NA	NA	NA	NA	NA	NA
TCGA-AA-3982-01A	TCGA-AA-3982	Primary Tumor	Adenocarcinoma, NOS	Alive	NA	822	not reported	male	75	no	T3	N1	M0	Colon Adenocarcinoma	CIN	3 - left colon	MSI-L	Cluster3	0	0	YES	YES	M0	YES
TCGA-A6-3809-01A	TCGA-A6-3809	Primary Tumor	Mucinous adenocarcinoma	Alive	NA	996	white	female	71	no	T4	N0	M0	Colon Mucinous Adenocarcinoma	MSI/CIMP	2 - transverse colon	MSI-H	CIMP.H	1	NA	NO	NO	M0	NO
TCGA-CM-5341-01A	TCGA-CM-5341	Primary Tumor	Adenocarcinoma, NOS	Alive	NA	884	white	female	82	no	T2	N1a	M0	Colon Adenocarcinoma	NA	3 - left colon	MSS	NA	NA	NA	YES	NO	M0	YES
TCGA-G4-6302-01A	TCGA-G4-6302	Primary Tumor	Mucinous adenocarcinoma	Dead	0	0	white	female	90	no	T3	N0	M0	NA	NA	NA	NA	NA	NA	NA	NA	NA	NA	NA
TCGA-AA-3502-01A	TCGA-AA-3502	Primary Tumor	Adenocarcinoma, NOS	Alive	NA	1065	not reported	male	73	no	T2	N0	M0	Colon Adenocarcinoma	NA	2 - transverse colon	MSI-L	NA	NA	NA	NA	NA	M0	YES
TCGA-DM-A0XD-01A	TCGA-DM-A0XD	Primary Tumor	Adenocarcinoma, NOS	Dead	743	NA	white	male	65	no	T3	N0	M0	NA	NA	NA	NA	NA	NA	NA	NA	NA	NA	NA
TCGA-AA-3678-01A	TCGA-AA-3678	Primary Tumor	Adenocarcinoma, NOS	Alive	NA	1430	not reported	female	60	no	T2	N1	M0	Colon Adenocarcinoma	CIN	3 - left colon	MSS	Cluster4	0	0	YES	NO	M0	NO
TCGA-CK-4951-01A	TCGA-CK-4951	Primary Tumor	Mucinous adenocarcinoma	Dead	2134	2134	white	female	79	no	T3	N0	M0	Colon Mucinous Adenocarcinoma	NA	1 - right colon	MSI-H	NA	NA	NA	NA	NA	M0	NA
TCGA-AA-A02R-01A	TCGA-AA-A02R	Primary Tumor	Adenocarcinoma, NOS	Dead	670	NA	not reported	female	84	no	T3	N0	M0	Colon Adenocarcinoma	MSI/CIMP	1 - right colon	MSI-H	CIMP.H	1	NA	YES	YES	M0	NO
TCGA-G4-6309-01A	TCGA-G4-6309	Primary Tumor	Adenocarcinoma, NOS	Alive	NA	2600	black or african american	female	40	no	T3	N1	M0	NA	NA	NA	NA	NA	NA	NA	NA	NA	NA	NA
TCGA-AA-A01X-01A	TCGA-AA-A01X	Primary Tumor	Adenocarcinoma, NOS	Alive	NA	791	not reported	female	80	no	T2	N1	M0	Colon Adenocarcinoma	NA	3 - left colon	MSS	Cluster3	0	0	YES	NA	M0	YES
TCGA-5M-AAT4-01A	TCGA-5M-AAT4	Primary Tumor	Adenocarcinoma, NOS	Dead	49	NA	black or african american	male	74	no	T3	N0	M1b	NA	NA	NA	NA	NA	NA	NA	NA	NA	NA	NA
TCGA-A6-6652-01A	TCGA-A6-6652	Primary Tumor	Adenocarcinoma, NOS	Alive	NA	751	black or african american	male	59	no	T3	N0	M1	NA	NA	NA	NA	NA	NA	NA	NA	NA	NA	NA
TCGA-NH-A50U-01A	TCGA-NH-A50U	Primary Tumor	Mucinous adenocarcinoma	Dead	334	NA	black or african american	male	42	no	T4a	N0	M1a	NA	NA	NA	NA	NA	NA	NA	NA	NA	NA	NA
TCGA-A6-5664-01A	TCGA-A6-5664	Primary Tumor	Adenocarcinoma, NOS	Alive	NA	672	black or african american	male	80	no	T4a	N2a	MX	NA	NA	NA	NA	NA	NA	NA	NA	NA	NA	NA
TCGA-AA-A024-01A	TCGA-AA-A024	Primary Tumor	Mucinous adenocarcinoma	Dead	1188	61	not reported	male	81	yes	T3	N0	M0	Colon Mucinous Adenocarcinoma	Invasive	3 - left colon	MSI-L	Cluster3	0	0	NA	NA	M0	NO
TCGA-AA-3506-01A	TCGA-AA-3506	Primary Tumor	Adenocarcinoma, NOS	Alive	NA	1765	not reported	male	77	yes	T2	N0	M0	Colon Adenocarcinoma	NA	1 - right colon	MSS	NA	NA	NA	NA	NA	M0	NA
TCGA-AZ-4308-01A	TCGA-AZ-4308	Primary Tumor	Adenocarcinoma, NOS	Alive	NA	3324	white	female	47	no	T3	N1	M0	Colon Adenocarcinoma	NA	3 - left colon	MSS	NA	NA	NA	YES	NO	M0	NA
TCGA-CM-6169-01A	TCGA-CM-6169	Primary Tumor	Adenocarcinoma, NOS	Alive	NA	396	black or african american	male	67	no	T3	N0	M0	NA	NA	NA	NA	NA	NA	NA	NA	NA	NA	NA
TCGA-AA-A00D-01A	TCGA-AA-A00D	Primary Tumor	Adenocarcinoma, NOS	Alive	NA	578	not reported	male	70	no	T2	N0	M0	Colon Adenocarcinoma	MSI/CIMP	1 - right colon	MSS	CIMP.H	0	0	NO	NO	M0	YES
TCGA-AA-A02O-01A	TCGA-AA-A02O	Primary Tumor	Adenocarcinoma, NOS	Alive	NA	28	not reported	male	82	no	T3	N0	M0	Colon Adenocarcinoma	NA	2 - transverse colon	MSS	CIMP.H	0	0	YES	NO	M0	NO
TCGA-AA-A03J-01A	TCGA-AA-A03J	Primary Tumor	Adenocarcinoma, NOS	Alive	NA	1246	not reported	female	65	no	T2	N0	M0	Colon Adenocarcinoma	NA	3 - left colon	MSS	CIMP.L	0	0	NA	NA	M0	YES
TCGA-AA-3529-01A	TCGA-AA-3529	Primary Tumor	Adenocarcinoma, NOS	Dead	0	NA	not reported	female	78	no	T3	N2	M0	Colon Adenocarcinoma	CIN	3 - left colon	MSI-L	Cluster4	0	0	YES	NO	M0	NO
TCGA-AA-3854-01A	TCGA-AA-3854	Primary Tumor	Mucinous adenocarcinoma	Alive	NA	1096	not reported	female	71	no	T2	N0	M0	Colon Mucinous Adenocarcinoma	Invasive	3 - left colon	MSI-L	CIMP.L	0	0	YES	YES	M0	YES
TCGA-A6-6137-01A	TCGA-A6-6137	Primary Tumor	Adenocarcinoma, NOS	Alive	NA	824	white	male	55	no	T3	N1c	M0	NA	NA	NA	NA	NA	NA	NA	NA	NA	NA	NA
TCGA-AA-3518-01A	TCGA-AA-3518	Primary Tumor	Adenocarcinoma, NOS	Alive	NA	31	not reported	female	81	no	T3	N0	M0	Colon Adenocarcinoma	MSI/CIMP	1 - right colon	MSI-H	CIMP.H	1	1	NO	NO	M0	NO
TCGA-CA-5254-01A	TCGA-CA-5254	Primary Tumor	Adenocarcinoma, NOS	Alive	NA	386	asian	female	42	no	T3	N0	M0	NA	NA	NA	NA	NA	NA	NA	NA	NA	NA	NA
TCGA-AA-A010-01A	TCGA-AA-A010	Primary Tumor	Adenocarcinoma, NOS	Alive	NA	1064	not reported	female	46	no	T4	N0	M0	Colon Adenocarcinoma	MSI/CIMP	2 - transverse colon	MSI-L	Cluster4	0	1	NO	NO	M0	NO
TCGA-4N-A93T-01A	TCGA-4N-A93T	Primary Tumor	Adenocarcinoma, NOS	Alive	NA	146	black or african american	male	67	no	T4a	N1b	M0	NA	NA	NA	NA	NA	NA	NA	NA	NA	NA	NA
TCGA-AZ-5407-01A	TCGA-AZ-5407	Primary Tumor	Adenocarcinoma, NOS	Alive	NA	2683	white	female	51	no	T1	N0	M0	NA	NA	NA	NA	NA	NA	NA	NA	NA	NA	NA
TCGA-DM-A1D9-01A	TCGA-DM-A1D9	Primary Tumor	Adenocarcinoma, NOS	Alive	NA	4270	white	female	67	no	T3	N0	M0	NA	NA	NA	NA	NA	NA	NA	NA	NA	NA	NA
TCGA-AA-A022-01A	TCGA-AA-A022	Primary Tumor	Adenocarcinoma, NOS	Alive	NA	0	not reported	female	88	no	T4	N0	M0	Colon Adenocarcinoma	NA	1 - right colon	MSI-H	CIMP.H	1	1	YES	YES	M0	NO
TCGA-AD-6888-01A	TCGA-AD-6888	Primary Tumor	Adenocarcinoma, NOS	Dead	472	155	white	male	73	yes	T3	N1b	M0	NA	NA	NA	NA	NA	NA	NA	NA	NA	NA	NA
TCGA-AA-3538-01A	TCGA-AA-3538	Primary Tumor	Adenocarcinoma, NOS	Alive	NA	791	not reported	female	54	no	T2	N0	M0	Colon Adenocarcinoma	CIN	3 - left colon	MSS	Cluster4	0	0	NO	NO	M0	NO
TCGA-AD-6889-01A	TCGA-AD-6889	Primary Tumor	Adenocarcinoma, NOS	Dead	2532	2056	asian	male	76	no	T3	N0	M0	NA	NA	NA	NA	NA	NA	NA	NA	NA	NA	NA
TCGA-AA-3837-01A	TCGA-AA-3837	Primary Tumor	Mucinous adenocarcinoma	Alive	NA	1186	not reported	male	67	no	T3	N0	M0	Colon Mucinous Adenocarcinoma	CIN	1 - right colon	MSS	CIMP.H	0	0	YES	NA	M0	YES
TCGA-A6-2683-01A	TCGA-A6-2683	Primary Tumor	Adenocarcinoma, NOS	Dead	504	472	white	female	57	no	T4	N0	M1	Colon Adenocarcinoma	CIN	1 - right colon	MSI-L	CIMP.L	0	0	NO	NO	M1	YES
TCGA-F4-6854-01A	TCGA-F4-6854	Primary Tumor	Adenocarcinoma, NOS	Alive	NA	16	white	female	77	no	T3	N0	M0	NA	NA	NA	NA	NA	NA	NA	NA	NA	NA	NA
TCGA-AA-3979-01A	TCGA-AA-3979	Primary Tumor	Adenocarcinoma, NOS	Alive	NA	730	not reported	male	84	yes	T3	N0	M0	Colon Adenocarcinoma	Invasive	3 - left colon	MSS	CIMP.L	0	0	NO	NO	M0	NO
TCGA-AA-3655-01A	TCGA-AA-3655	Primary Tumor	Adenocarcinoma, NOS	Alive	NA	1856	not reported	male	68	no	T3	N0	M0	NA	NA	NA	NA	NA	NA	NA	NA	NA	NA	NA
TCGA-AA-3833-01A	TCGA-AA-3833	Primary Tumor	Adenocarcinoma, NOS	Alive	NA	485	not reported	female	63	no	T3	N0	M0	Colon Adenocarcinoma	MSI/CIMP	1 - right colon	MSI-H	CIMP.H	1	1	YES	YES	M0	YES
TCGA-AA-3534-01A	TCGA-AA-3534	Primary Tumor	Adenocarcinoma, NOS	Alive	NA	882	not reported	female	78	no	T3	N0	M0	Colon Adenocarcinoma	CIN	1 - right colon	MSS	Cluster3	0	0	YES	NO	M0	YES
TCGA-AA-3866-01A	TCGA-AA-3866	Primary Tumor	Adenocarcinoma, NOS	Alive	NA	518	not reported	female	78	no	T2	N0	M0	Colon Adenocarcinoma	MSI/CIMP	1 - right colon	MSI-L	Cluster3	0	0	NO	NO	M0	NO
TCGA-AA-3875-01A	TCGA-AA-3875	Primary Tumor	Adenocarcinoma, NOS	Alive	NA	549	not reported	female	78	no	T1	N0	M0	Colon Adenocarcinoma	CIN	1 - right colon	MSS	Cluster3	0	0	NO	NO	M0	NO
TCGA-AA-3549-01A	TCGA-AA-3549	Primary Tumor	Adenocarcinoma, NOS	Alive	NA	639	not reported	male	69	no	T2	N0	M0	Colon Adenocarcinoma	CIN	1 - right colon	MSS	CIMP.L	0	0	NO	NO	M0	YES
TCGA-CM-5349-01A	TCGA-CM-5349	Primary Tumor	Adenocarcinoma, NOS	Alive	NA	915	white	female	68	no	T3	N0	M0	NA	NA	NA	NA	NA	NA	NA	NA	NA	NA	NA
TCGA-D5-5539-01A	TCGA-D5-5539	Primary Tumor	Mucinous adenocarcinoma	Alive	NA	596	white	male	60	no	T3	N1	M0	NA	NA	NA	NA	NA	NA	NA	NA	NA	NA	NA
TCGA-AA-3526-01A	TCGA-AA-3526	Primary Tumor	Adenocarcinoma, NOS	Alive	NA	580	not reported	male	57	no	T2	N0	M0	Colon Adenocarcinoma	MSI/CIMP	3 - left colon	MSI-L	Cluster3	0	0	NO	NO	M0	YES
TCGA-NH-A5IV-01A	TCGA-NH-A5IV	Primary Tumor	Adenocarcinoma, NOS	Alive	NA	0	black or african american	female	90	no	T3	N0	MX	NA	NA	NA	NA	NA	NA	NA	NA	NA	NA	NA
TCGA-CM-4752-01A	TCGA-CM-4752	Primary Tumor	Adenocarcinoma, NOS	Alive	NA	396	black or african american	male	58	no	T3	N0	M0	Colon Adenocarcinoma	NA	1 - right colon	MSS	NA	NA	NA	NO	NO	M0	YES
TCGA-AA-3952-01A	TCGA-AA-3952	Primary Tumor	Adenocarcinoma, NOS	Dead	61	NA	not reported	male	68	yes	T3	N2	M0	Colon Adenocarcinoma	MSI/CIMP	3 - left colon	MSS	Cluster4	0	0	YES	YES	M0	YES
TCGA-AA-3679-01A	TCGA-AA-3679	Primary Tumor	Adenocarcinoma, NOS	Alive	NA	457	not reported	male	59	no	T3	N2	M1	Colon Adenocarcinoma	CIN	3 - left colon	MSS	Cluster4	0	0	YES	NO	M1	NO
TCGA-AA-3519-01A	TCGA-AA-3519	Primary Tumor	Adenocarcinoma, NOS	Alive	NA	276	not reported	male	63	no	T3	N1	M0	Colon Adenocarcinoma	CIN	4 - rectum	MSS	Cluster3	0	0	NO	NO	M0	YES
TCGA-G4-6303-01A	TCGA-G4-6303	Primary Tumor	Adenocarcinoma, NOS	Dead	2003	1882	white	female	54	no	T3	N1	M1	NA	NA	NA	NA	NA	NA	NA	NA	NA	NA	NA
TCGA-AA-3848-01A	TCGA-AA-3848	Primary Tumor	Adenocarcinoma, NOS	Dead	306	30	not reported	female	82	no	T3	N2	M0	Colon Adenocarcinoma	CIN	3 - left colon	MSS	CIMP.L	0	0	YES	YES	M0	YES
TCGA-D5-5540-01A	TCGA-D5-5540	Primary Tumor	Adenocarcinoma, NOS	Alive	NA	1706	white	male	73	no	T3	N0	M0	NA	NA	NA	NA	NA	NA	NA	NA	NA	NA	NA
TCGA-CK-6751-01A	TCGA-CK-6751	Primary Tumor	Mucinous adenocarcinoma	Alive	NA	518	white	female	88	no	T2	N0	MX	NA	NA	NA	NA	NA	NA	NA	NA	NA	NA	NA
TCGA-AA-3492-01A	TCGA-AA-3492	Primary Tumor	Adenocarcinoma, NOS	Dead	1	0	not reported	female	90	no	T3	N0	M0	Colon Adenocarcinoma	NA	1 - right colon	MSI-H	NA	NA	NA	NO	NO	M0	NO
TCGA-AA-3561-01A	TCGA-AA-3561	Primary Tumor	Adenocarcinoma, NOS	Alive	NA	424	not reported	male	72	no	T3	N0	M0	Colon Adenocarcinoma	Invasive	1 - right colon	MSS	Cluster3	0	0	NO	NO	M0	YES
TCGA-CA-6719-01A	TCGA-CA-6719	Primary Tumor	Adenocarcinoma, NOS	Alive	NA	435	asian	male	77	no	T3	N0	M0	NA	NA	NA	NA	NA	NA	NA	NA	NA	NA	NA
TCGA-AA-A02H-01A	TCGA-AA-A02H	Primary Tumor	Adenocarcinoma, NOS	Dead	61	NA	not reported	female	74	no	T3	N2	M1	Colon Adenocarcinoma	CIN	3 - left colon	MSS	Cluster3	0	0	YES	YES	M1	NO
TCGA-DM-A28G-01A	TCGA-DM-A28G	Primary Tumor	Adenocarcinoma, NOS	Dead	1849	1849	white	male	75	no	T3	N0	M0	NA	NA	NA	NA	NA	NA	NA	NA	NA	NA	NA
TCGA-G4-6321-01A	TCGA-G4-6321	Primary Tumor	Adenocarcinoma, NOS	Alive	NA	672	white	female	60	yes	T2	N1	MX	NA	NA	NA	NA	NA	NA	NA	NA	NA	NA	NA
TCGA-NH-A8F7-06A	TCGA-NH-A8F7	Metastatic	Adenocarcinoma, NOS	Alive	NA	543	black or african american	female	53	no	T3	N0	MX	NA	NA	NA	NA	NA	NA	NA	NA	NA	NA	NA
TCGA-A6-6649-01A	TCGA-A6-6649	Primary Tumor	Adenocarcinoma, NOS	Alive	NA	735	white	male	66	yes	T3	N1b	M0	NA	NA	NA	NA	NA	NA	NA	NA	NA	NA	NA
TCGA-D5-6534-01A	TCGA-D5-6534	Primary Tumor	Mucinous adenocarcinoma	Alive	NA	1316	white	female	62	no	T3	N0	M0	NA	NA	NA	NA	NA	NA	NA	NA	NA	NA	NA
TCGA-AA-3494-01A	TCGA-AA-3494	Primary Tumor	Adenocarcinoma, NOS	Alive	NA	31	not reported	male	55	no	T3	N0	M1	Colon Adenocarcinoma	NA	3 - left colon	MSS	NA	NA	NA	NA	NA	M1	NO
TCGA-A6-6650-01A	TCGA-A6-6650	Primary Tumor	Adenocarcinoma, NOS	Alive	NA	627	black or african american	female	69	no	T3	N0	M0	NA	NA	NA	NA	NA	NA	NA	NA	NA	NA	NA
TCGA-AZ-4315-01A	TCGA-AZ-4315	Primary Tumor	Adenocarcinoma, NOS	Alive	NA	1776	white	male	61	no	T3	N0	M0	Colon Adenocarcinoma	NA	1 - right colon	MSS	NA	NA	NA	NO	NO	M0	NA
TCGA-G4-6304-01A	TCGA-G4-6304	Primary Tumor	Adenocarcinoma, NOS	Alive	NA	1631	white	female	66	no	T4	N0	M0	NA	NA	NA	NA	NA	NA	NA	NA	NA	NA	NA
TCGA-D5-6530-01A	TCGA-D5-6530	Primary Tumor	Adenocarcinoma, NOS	Alive	NA	621	white	male	53	no	T2	N0	M0	NA	NA	NA	NA	NA	NA	NA	NA	NA	NA	NA
TCGA-AA-A00O-01A	TCGA-AA-A00O	Primary Tumor	Adenocarcinoma, NOS	Alive	NA	822	not reported	female	83	no	T3	N2	M0	Colon Adenocarcinoma	CIN	3 - left colon	MSI-L	Cluster4	0	0	YES	NO	M0	NO
TCGA-A6-A56B-01A	TCGA-A6-A56B	Primary Tumor	Adenocarcinoma, NOS	Dead	1711	1595	black or african american	male	57	no	T3	N1	M0	NA	NA	NA	NA	NA	NA	NA	NA	NA	NA	NA
TCGA-G4-6298-01A	TCGA-G4-6298	Primary Tumor	Adenocarcinoma, NOS	Dead	0	NA	black or african american	male	90	yes	T4a	N1	MX	NA	NA	NA	NA	NA	NA	NA	NA	NA	NA	NA
TCGA-AZ-6607-01A	TCGA-AZ-6607	Primary Tumor	Adenocarcinoma, NOS	Dead	97	NA	white	male	69	no	T4	N2	M1	NA	NA	NA	NA	NA	NA	NA	NA	NA	NA	NA
TCGA-RU-A8FL-01A	TCGA-RU-A8FL	Primary Tumor	Adenocarcinoma, NOS	Alive	NA	1177	black or african american	male	51	no	T3	N2a	MX	NA	NA	NA	NA	NA	NA	NA	NA	NA	NA	NA
TCGA-CM-6678-01A	TCGA-CM-6678	Primary Tumor	Adenocarcinoma, NOS	Alive	NA	335	white	female	63	no	T4a	N1c	M1a	NA	NA	NA	NA	NA	NA	NA	NA	NA	NA	NA
TCGA-A6-2686-01A	TCGA-A6-2686	Primary Tumor	Adenocarcinoma, NOS	Dead	1126	488	white	female	81	no	T3	N0	M0	Colon Adenocarcinoma	NA	1 - right colon	MSI-H	NA	NA	NA	NO	NO	M0	NO
TCGA-D5-6922-01A	TCGA-D5-6922	Primary Tumor	Adenocarcinoma, NOS	Alive	NA	308	white	male	76	no	T3	N1	M0	NA	NA	NA	NA	NA	NA	NA	NA	NA	NA	NA
TCGA-AZ-4323-01A	TCGA-AZ-4323	Primary Tumor	Adenocarcinoma, NOS	Dead	43	NA	white	male	37	no	T4	N2	M1	NA	NA	NA	NA	NA	NA	NA	NA	NA	NA	NA
TCGA-DM-A0X9-01A	TCGA-DM-A0X9	Primary Tumor	Adenocarcinoma, NOS	Alive	NA	3641	white	female	71	no	T3	N0	M0	NA	NA	NA	NA	NA	NA	NA	NA	NA	NA	NA
TCGA-AM-5820-01A	TCGA-AM-5820	Primary Tumor	Adenocarcinoma, NOS	Alive	NA	14	white	female	59	no	T4a	N2	M1	NA	NA	NA	NA	NA	NA	NA	NA	NA	NA	NA
TCGA-D5-6531-01A	TCGA-D5-6531	Primary Tumor	Adenocarcinoma, NOS	Alive	NA	540	white	male	75	no	T3	N0	M0	NA	NA	NA	NA	NA	NA	NA	NA	NA	NA	NA
TCGA-AA-3696-01A	TCGA-AA-3696	Primary Tumor	Adenocarcinoma, NOS	Dead	153	0	not reported	female	75	no	T3	N1	M1	Colon Adenocarcinoma	CIN	3 - left colon	MSS	Cluster4	0	0	NO	NO	M1	YES
TCGA-AA-3697-01A	TCGA-AA-3697	Primary Tumor	Adenocarcinoma, NOS	Alive	NA	2587	not reported	male	77	no	T3	N0	M0	NA	NA	NA	NA	NA	NA	NA	NA	NA	NA	NA
TCGA-AY-6196-01A	TCGA-AY-6196	Primary Tumor	Mucinous adenocarcinoma	Alive	NA	6	white	male	47	no	T3	N2b	NA	NA	NA	NA	NA	NA	NA	NA	NA	NA	NA	NA
TCGA-AA-3672-01A	TCGA-AA-3672	Primary Tumor	Adenocarcinoma, NOS	Alive	NA	0	not reported	female	90	yes	T3	N1	M0	Colon Adenocarcinoma	MSI/CIMP	2 - transverse colon	MSI-H	CIMP.H	1	1	NO	NO	M0	NO
TCGA-AY-A69D-01A	TCGA-AY-A69D	Primary Tumor	Adenocarcinoma, NOS	Alive	NA	543	black or african american	female	55	no	T3	N0	M0	NA	NA	NA	NA	NA	NA	NA	NA	NA	NA	NA
TCGA-CM-6162-01A	TCGA-CM-6162	Primary Tumor	Mucinous adenocarcinoma	Alive	NA	365	white	female	48	no	T3	N1a	M0	NA	NA	NA	NA	NA	NA	NA	NA	NA	NA	NA
TCGA-NH-A6GB-01A	TCGA-NH-A6GB	Primary Tumor	Adenocarcinoma, NOS	Alive	NA	476	black or african american	female	71	no	T3	N2b	MX	NA	NA	NA	NA	NA	NA	NA	NA	NA	NA	NA
TCGA-AZ-4615-01A	TCGA-AZ-4615	Primary Tumor	Adenocarcinoma, NOS	Alive	NA	1002	white	male	84	no	T3	N1	M0	Colon Adenocarcinoma	NA	NA	MSI-H	NA	NA	NA	YES	YES	M0	NA
TCGA-AA-3521-01A	TCGA-AA-3521	Primary Tumor	Adenocarcinoma, NOS	Alive	NA	NA	not reported	male	87	yes	T3	N0	M0	Colon Adenocarcinoma	CIN	3 - left colon	MSS	Cluster3	0	0	NO	NO	M0	YES
TCGA-QG-A5YX-01A	TCGA-QG-A5YX	Primary Tumor	Adenocarcinoma, NOS	Alive	NA	1003	black or african american	female	61	no	T3	N0	MX	NA	NA	NA	NA	NA	NA	NA	NA	NA	NA	NA
TCGA-AD-6895-01A	TCGA-AD-6895	Primary Tumor	Adenocarcinoma, NOS	Alive	NA	763	white	male	84	yes	T3	N1a	M0	NA	NA	NA	NA	NA	NA	NA	NA	NA	NA	NA
TCGA-AA-3986-01A	TCGA-AA-3986	Primary Tumor	Adenocarcinoma, NOS	Alive	NA	580	not reported	male	73	yes	T2	N0	M0	Colon Adenocarcinoma	Invasive	2 - transverse colon	MSS	Cluster3	0	0	NO	NO	M0	YES
TCGA-NH-A8F8-01A	TCGA-NH-A8F8	Primary Tumor	Adenocarcinoma, NOS	Dead	511	167	black or african american	male	79	no	T4a	N2b	M1	NA	NA	NA	NA	NA	NA	NA	NA	NA	NA	NA
TCGA-G4-6307-01A	TCGA-G4-6307	Primary Tumor	Adenocarcinoma, NOS	Alive	NA	1674	white	female	37	no	T3	N1	M0	NA	NA	NA	NA	NA	NA	NA	NA	NA	NA	NA
TCGA-CA-6718-01A	TCGA-CA-6718	Primary Tumor	Adenocarcinoma, NOS	Dead	306	3	asian	male	46	no	T3	N0	M0	NA	NA	NA	NA	NA	NA	NA	NA	NA	NA	NA
TCGA-A6-2674-01A	TCGA-A6-2674	Primary Tumor	Mucinous adenocarcinoma	Alive	NA	1331	white	male	71	no	T3	N2	M1	Colon Mucinous Adenocarcinoma	MSI/CIMP	3 - left colon	MSS	Cluster4	0	0	NO	YES	M1	NO
TCGA-G4-6317-02A	TCGA-G4-6317	Recurrent Tumor	Adenocarcinoma, NOS	Alive	NA	1095	white	female	51	no	T3	N2	MX	NA	NA	NA	NA	NA	NA	NA	NA	NA	NA	NA
TCGA-DM-A28F-01A	TCGA-DM-A28F	Primary Tumor	Adenocarcinoma, NOS	Dead	1094	1094	white	male	73	no	T3	N1	M0	NA	NA	NA	NA	NA	NA	NA	NA	NA	NA	NA
TCGA-AA-3984-01A	TCGA-AA-3984	Primary Tumor	Adenocarcinoma, NOS	Alive	NA	0	not reported	female	61	no	T3	N0	M0	Colon Adenocarcinoma	Invasive	3 - left colon	MSS	Cluster4	0	1	YES	YES	M0	YES
TCGA-D5-6932-01A	TCGA-D5-6932	Primary Tumor	Adenocarcinoma, NOS	Alive	NA	346	white	male	69	no	T3	N0	M0	NA	NA	NA	NA	NA	NA	NA	NA	NA	NA	NA
TCGA-AA-3977-01A	TCGA-AA-3977	Primary Tumor	Adenocarcinoma, NOS	Alive	NA	761	not reported	male	65	no	T2	N0	NA	Colon Adenocarcinoma	MSI/CIMP	3 - left colon	MSS	Cluster3	0	1	NO	NO	NA	YES
TCGA-F4-6808-01A	TCGA-F4-6808	Primary Tumor	Adenocarcinoma, NOS	Alive	NA	1024	white	female	54	no	T1	N0	M0	NA	NA	NA	NA	NA	NA	NA	NA	NA	NA	NA
TCGA-A6-6654-01A	TCGA-A6-6654	Primary Tumor	Adenocarcinoma, NOS	Alive	NA	726	white	female	65	no	T3	N1	M0	NA	NA	NA	NA	NA	NA	NA	NA	NA	NA	NA
TCGA-AA-3675-01A	TCGA-AA-3675	Primary Tumor	Adenocarcinoma, NOS	Alive	NA	1431	not reported	male	84	no	T3	N0	M0	Colon Adenocarcinoma	NA	1 - right colon	MSS	CIMP.L	0	NA	NO	NO	M0	YES
TCGA-AA-3495-01A	TCGA-AA-3495	Primary Tumor	Adenocarcinoma, NOS	Alive	NA	1127	not reported	male	79	no	T2	N0	M0	Colon Adenocarcinoma	NA	1 - right colon	MSS	NA	NA	NA	NA	NA	M0	YES
TCGA-CM-5863-01A	TCGA-CM-5863	Primary Tumor	Mucinous adenocarcinoma	Alive	NA	457	white	female	60	no	T3	N1b	M0	NA	NA	NA	NA	NA	NA	NA	NA	NA	NA	NA
TCGA-F4-6856-01A	TCGA-F4-6856	Primary Tumor	Mucinous adenocarcinoma	Alive	NA	1074	white	male	45	no	T2	N0	M0	NA	NA	NA	NA	NA	NA	NA	NA	NA	NA	NA
TCGA-F4-6806-01A	TCGA-F4-6806	Primary Tumor	Adenocarcinoma, NOS	Alive	NA	1260	white	female	59	no	T2	N0	M0	NA	NA	NA	NA	NA	NA	NA	NA	NA	NA	NA
TCGA-QG-A5Z1-01A	TCGA-QG-A5Z1	Primary Tumor	Adenocarcinoma, NOS	Dead	256	202	black or african american	male	71	no	T3	N1b	MX	NA	NA	NA	NA	NA	NA	NA	NA	NA	NA	NA
TCGA-CM-4751-01A	TCGA-CM-4751	Primary Tumor	Adenocarcinoma, NOS	Alive	NA	822	white	male	62	no	T3	N1b	M0	NA	NA	NA	NA	NA	NA	NA	NA	NA	NA	NA
TCGA-AY-4071-01A	TCGA-AY-4071	Primary Tumor	Adenocarcinoma, NOS	Dead	29	NA	white	female	63	no	T1	N0	NA	NA	CIN	NA	MSS	Cluster3	0	0	NO	NO	NA	YES
TCGA-A6-2682-01A	TCGA-A6-2682	Primary Tumor	Adenocarcinoma, NOS	Dead	424	NA	white	male	70	yes	T4b	N1	M1	Colon Adenocarcinoma	NA	1 - right colon	MSS	NA	NA	NA	YES	YES	M1	YES
TCGA-G4-6306-01A	TCGA-G4-6306	Primary Tumor	Adenocarcinoma, NOS	Alive	NA	1359	white	male	71	no	T2	N0	M0	NA	NA	NA	NA	NA	NA	NA	NA	NA	NA	NA
TCGA-CM-5864-01A	TCGA-CM-5864	Primary Tumor	Adenocarcinoma, NOS	Alive	NA	457	white	male	60	no	T2	N0	M0	NA	NA	NA	NA	NA	NA	NA	NA	NA	NA	NA
TCGA-A6-6782-01A	TCGA-A6-6782	Primary Tumor	Adenocarcinoma, NOS	Alive	NA	617	white	male	82	no	T4a	N0	MX	NA	NA	NA	NA	NA	NA	NA	NA	NA	NA	NA
TCGA-CM-6680-01A	TCGA-CM-6680	Primary Tumor	Adenocarcinoma, NOS	Alive	NA	366	white	female	78	no	T3	N2a	M0	NA	NA	NA	NA	NA	NA	NA	NA	NA	NA	NA
TCGA-G4-6310-01A	TCGA-G4-6310	Primary Tumor	Adenocarcinoma, NOS	Alive	NA	1935	white	male	69	yes	T3	N1	M0	NA	NA	NA	NA	NA	NA	NA	NA	NA	NA	NA
TCGA-CA-6717-01A	TCGA-CA-6717	Primary Tumor	Mucinous adenocarcinoma	Alive	NA	388	asian	male	57	no	T3	N0	M0	NA	NA	NA	NA	NA	NA	NA	NA	NA	NA	NA
TCGA-A6-6780-01B	TCGA-A6-6780	Primary Tumor	Mucinous adenocarcinoma	Alive	NA	612	white	male	74	no	T3	N0	MX	NA	NA	NA	NA	NA	NA	NA	NA	NA	NA	NA
TCGA-A6-6780-01A	TCGA-A6-6780	Primary Tumor	Mucinous adenocarcinoma	Alive	NA	612	white	male	74	no	T3	N0	MX	NA	NA	NA	NA	NA	NA	NA	NA	NA	NA	NA
TCGA-AA-3555-01A	TCGA-AA-3555	Primary Tumor	Mucinous adenocarcinoma	Alive	NA	911	not reported	female	81	no	T3	N0	M0	Colon Mucinous Adenocarcinoma	MSI/CIMP	1 - right colon	MSS	CIMP.L	0	1	NO	NO	M0	YES
TCGA-A6-6781-01A	TCGA-A6-6781	Primary Tumor	Mucinous adenocarcinoma	Alive	NA	598	white	male	43	no	T4b	N1b	MX	NA	NA	NA	NA	NA	NA	NA	NA	NA	NA	NA
TCGA-CM-4743-01A	TCGA-CM-4743	Primary Tumor	Adenocarcinoma, NOS	Alive	NA	701	white	male	69	no	T3	N0	M0	NA	NA	NA	NA	NA	NA	NA	NA	NA	NA	NA
TCGA-D5-6931-01A	TCGA-D5-6931	Primary Tumor	Adenocarcinoma, NOS	Alive	NA	365	white	male	77	no	T4b	N2	M0	NA	NA	NA	NA	NA	NA	NA	NA	NA	NA	NA
TCGA-D5-6927-01A	TCGA-D5-6927	Primary Tumor	Adenocarcinoma, NOS	Alive	NA	287	white	male	34	no	T3	N0	M0	NA	NA	NA	NA	NA	NA	NA	NA	NA	NA	NA
TCGA-G4-6625-01A	TCGA-G4-6625	Primary Tumor	Adenocarcinoma, NOS	Alive	NA	2792	white	female	77	yes	T3	N0	M0	NA	NA	NA	NA	NA	NA	NA	NA	NA	NA	NA
TCGA-CM-6164-01A	TCGA-CM-6164	Primary Tumor	Adenocarcinoma, NOS	Alive	NA	883	white	female	46	no	T3	N0	M0	NA	NA	NA	NA	NA	NA	NA	NA	NA	NA	NA
TCGA-A6-A5ZU-01A	TCGA-A6-A5ZU	Primary Tumor	Adenocarcinoma, NOS	Alive	NA	293	black or african american	male	59	no	T3	N1	M0	NA	NA	NA	NA	NA	NA	NA	NA	NA	NA	NA
TCGA-DM-A1D7-01A	TCGA-DM-A1D7	Primary Tumor	Mucinous adenocarcinoma	Dead	405	405	white	male	82	no	T3	N0	M0	NA	NA	NA	NA	NA	NA	NA	NA	NA	NA	NA
TCGA-DM-A282-01A	TCGA-DM-A282	Primary Tumor	Mucinous adenocarcinoma	Alive	NA	4233	white	female	60	no	T3	N0	M0	NA	NA	NA	NA	NA	NA	NA	NA	NA	NA	NA
TCGA-QG-A5Z2-01A	TCGA-QG-A5Z2	Primary Tumor	Adenocarcinoma, NOS	Alive	NA	952	black or african american	male	61	no	T2	N0	M0	NA	NA	NA	NA	NA	NA	NA	NA	NA	NA	NA
TCGA-AA-3989-01A	TCGA-AA-3989	Primary Tumor	Adenocarcinoma, NOS	Dead	242	0	not reported	male	84	no	T3	N2	M1	Colon Adenocarcinoma	Invasive	2 - transverse colon	MSS	CIMP.L	0	0	YES	NO	M1	YES
TCGA-D5-6532-01A	TCGA-D5-6532	Primary Tumor	Adenocarcinoma, NOS	Alive	NA	555	white	male	61	no	T3	N0	M0	NA	NA	NA	NA	NA	NA	NA	NA	NA	NA	NA
TCGA-AA-3660-01A	TCGA-AA-3660	Primary Tumor	Adenocarcinoma, NOS	Alive	NA	2375	not reported	female	51	no	T3	N0	M0	NA	NA	NA	NA	NA	NA	NA	NA	NA	NA	NA
TCGA-AA-3554-01A	TCGA-AA-3554	Primary Tumor	Adenocarcinoma, NOS	Alive	NA	546	not reported	female	62	yes	T3	N0	M0	Colon Adenocarcinoma	MSI/CIMP	1 - right colon	MSI-H	Cluster4	0	1	NO	NO	M0	YES
TCGA-DM-A285-01A	TCGA-DM-A285	Primary Tumor	Mucinous adenocarcinoma	Dead	179	NA	white	female	71	yes	T3	N2	M1	NA	NA	NA	NA	NA	NA	NA	NA	NA	NA	NA
TCGA-5M-AAT5-01A	TCGA-5M-AAT5	Primary Tumor	NA	NA	NA	NA	NA	NA	NA	NA	NA	NA	NA	NA	NA	NA	NA	NA	NA	NA	NA	NA	NA	NA
TCGA-D5-6898-01A	TCGA-D5-6898	Primary Tumor	Adenocarcinoma, NOS	Alive	NA	229	white	female	51	no	T2	N0	M0	NA	NA	NA	NA	NA	NA	NA	NA	NA	NA	NA
TCGA-CM-5860-01A	TCGA-CM-5860	Primary Tumor	Adenocarcinoma, NOS	Alive	NA	974	white	male	44	no	T3	N0	M0	NA	NA	NA	NA	NA	NA	NA	NA	NA	NA	NA
TCGA-AA-A01S-01A	TCGA-AA-A01S	Primary Tumor	Adenocarcinoma, NOS	Alive	NA	31	not reported	female	47	no	T3	N1	M0	Colon Adenocarcinoma	NA	3 - left colon	MSI-L	Cluster4	1	0	NA	NA	M0	NO
TCGA-AA-3844-01A	TCGA-AA-3844	Primary Tumor	Adenocarcinoma, NOS	Alive	NA	454	not reported	female	78	yes	T3	N2	M0	Colon Adenocarcinoma	Invasive	3 - left colon	MSS	Cluster3	0	0	YES	YES	M0	NO
TCGA-3L-AA1B-01A	TCGA-3L-AA1B	Primary Tumor	Adenocarcinoma, NOS	Alive	NA	475	black or african american	female	61	no	T2	N0	M0	NA	NA	NA	NA	NA	NA	NA	NA	NA	NA	NA
TCGA-DM-A1DA-01A	TCGA-DM-A1DA	Primary Tumor	Adenocarcinoma, NOS	Dead	228	228	white	female	71	no	T3	N2	M0	NA	NA	NA	NA	NA	NA	NA	NA	NA	NA	NA
TCGA-AY-A71X-01A	TCGA-AY-A71X	Primary Tumor	Adenocarcinoma, NOS	Alive	NA	588	black or african american	female	54	no	T2	N0	M0	NA	NA	NA	NA	NA	NA	NA	NA	NA	NA	NA
TCGA-AA-3966-01A	TCGA-AA-3966	Primary Tumor	Mucinous adenocarcinoma	Alive	NA	61	not reported	female	89	no	T3	N0	M0	Colon Mucinous Adenocarcinoma	MSI/CIMP	1 - right colon	MSI-H	CIMP.L	1	1	YES	YES	M0	YES
TCGA-AA-3976-01A	TCGA-AA-3976	Primary Tumor	Adenocarcinoma, NOS	Alive	NA	791	not reported	male	70	yes	T2	N1	M0	Colon Adenocarcinoma	CIN	3 - left colon	MSS	Cluster3	0	0	NA	NO	M0	NO
TCGA-AA-3543-01A	TCGA-AA-3543	Primary Tumor	Mucinous adenocarcinoma	Alive	NA	30	not reported	male	84	yes	T2	N0	M0	Colon Mucinous Adenocarcinoma	MSI/CIMP	1 - right colon	MSI-H	CIMP.H	1	1	NO	NO	M0	YES
TCGA-A6-5667-01A	TCGA-A6-5667	Primary Tumor	Adenocarcinoma, NOS	Alive	NA	887	white	female	40	no	T3	N1a	MX	NA	NA	NA	NA	NA	NA	NA	NA	NA	NA	NA
TCGA-A6-6142-01A	TCGA-A6-6142	Primary Tumor	Adenocarcinoma, NOS	Alive	NA	763	white	female	56	no	T3	N1a	M1a	NA	NA	NA	NA	NA	NA	NA	NA	NA	NA	NA
TCGA-AA-3562-01A	TCGA-AA-3562	Primary Tumor	Adenocarcinoma, NOS	Alive	NA	608	not reported	male	82	yes	T3	N2	M0	Colon Adenocarcinoma	CIN	3 - left colon	MSS	Cluster3	0	0	YES	NO	M0	YES
TCGA-AY-A8YK-01A	TCGA-AY-A8YK	Primary Tumor	Adenocarcinoma, NOS	Alive	NA	573	black or african american	male	44	no	T3	N2a	M1	NA	NA	NA	NA	NA	NA	NA	NA	NA	NA	NA
TCGA-AA-3971-01A	TCGA-AA-3971	Primary Tumor	Adenocarcinoma, NOS	Alive	NA	489	not reported	male	58	no	T3	N1	M0	Colon Adenocarcinoma	CIN	3 - left colon	MSS	Cluster4	0	0	NO	NO	M0	NO
TCGA-CK-6748-01A	TCGA-CK-6748	Primary Tumor	Mucinous adenocarcinoma	Alive	NA	61	white	female	45	no	T3	N1	M1	NA	NA	NA	NA	NA	NA	NA	NA	NA	NA	NA
TCGA-AA-3970-01A	TCGA-AA-3970	Primary Tumor	Adenocarcinoma, NOS	Alive	NA	1096	not reported	male	65	no	T3	N0	M0	Colon Adenocarcinoma	NA	3 - left colon	MSS	Cluster3	0	NA	NO	NO	M0	YES
TCGA-5M-AATA-01A	TCGA-5M-AATA	Primary Tumor	NA	NA	NA	NA	NA	NA	NA	NA	NA	NA	NA	NA	NA	NA	NA	NA	NA	NA	NA	NA	NA	NA
TCGA-A6-2683-11A	TCGA-A6-2683	Solid Tissue Normal	Adenocarcinoma, NOS	Dead	504	472	white	female	57	no	T4	N0	M1	NA	NA	NA	NA	NA	NA	NA	NA	NA	NA	NA
TCGA-CK-4947-01B	TCGA-CK-4947	Primary Tumor	Adenocarcinoma, NOS	Alive	NA	534	white	female	46	no	T4	N1	M0	NA	NA	NA	NA	NA	NA	NA	NA	NA	NA	NA
TCGA-CA-5256-01A	TCGA-CA-5256	Primary Tumor	Adenocarcinoma, NOS	Alive	NA	379	asian	female	54	no	T3	N0	M0	Colon Adenocarcinoma	NA	1 - right colon	MSS	NA	NA	NA	NA	NA	M0	NO
TCGA-AA-3930-01A	TCGA-AA-3930	Primary Tumor	Adenocarcinoma, NOS	Dead	61	0	not reported	male	66	no	T3	N2	M1	Colon Adenocarcinoma	MSI/CIMP	1 - right colon	MSI-L	CIMP.L	0	0	YES	YES	M1	NO
TCGA-AA-A02F-01A	TCGA-AA-A02F	Primary Tumor	Carcinoma, NOS	Alive	NA	1216	not reported	female	68	no	T3	N1	M1	Colon Adenocarcinoma	CIN	3 - left colon	MSS	Cluster4	0	0	YES	YES	M1	NO
TCGA-AZ-4684-01A	TCGA-AZ-4684	Primary Tumor	Adenocarcinoma, NOS	Alive	NA	1977	white	male	49	no	T3	N2	M1	Colon Adenocarcinoma	NA	NA	MSI-L	NA	NA	NA	YES	NA	M1	NA
TCGA-D5-6535-01A	TCGA-D5-6535	Primary Tumor	Adenocarcinoma, NOS	Alive	NA	460	white	female	80	no	T3	N1	MX	NA	NA	NA	NA	NA	NA	NA	NA	NA	NA	NA
TCGA-A6-6138-01A	TCGA-A6-6138	Primary Tumor	Adenocarcinoma, NOS	Alive	NA	685	white	male	61	no	T2	N0	M0	NA	NA	NA	NA	NA	NA	NA	NA	NA	NA	NA
TCGA-AA-A02K-01A	TCGA-AA-A02K	Primary Tumor	Adenocarcinoma, NOS	Dead	426	0	not reported	male	50	no	T4	N2	M1	Colon Adenocarcinoma	NA	1 - right colon	MSS	Cluster3	0	NA	YES	YES	M1	NO
TCGA-CM-4747-01A	TCGA-CM-4747	Primary Tumor	Adenocarcinoma, NOS	Alive	NA	761	white	male	47	no	T4a	N1b	M1a	Colon Adenocarcinoma	NA	1 - right colon	MSI-L	NA	NA	NA	YES	NO	M1a	YES
TCGA-CA-5255-01A	TCGA-CA-5255	Primary Tumor	Adenocarcinoma, NOS	Alive	NA	376	asian	male	45	no	T3	N0	M0	NA	NA	NA	NA	NA	NA	NA	NA	NA	NA	NA
TCGA-AA-3556-01A	TCGA-AA-3556	Primary Tumor	Mucinous adenocarcinoma	Alive	NA	700	not reported	male	78	yes	T2	N0	M0	NA	MSI/CIMP	3 - left colon	MSS	CIMP.L	0	0	NO	NO	M0	YES
TCGA-AA-3821-01A	TCGA-AA-3821	Primary Tumor	Mucinous adenocarcinoma	Alive	NA	31	not reported	female	81	no	T2	N0	M0	Colon Mucinous Adenocarcinoma	MSI/CIMP	1 - right colon	MSI-H	CIMP.H	1	1	NA	NA	M0	YES
TCGA-A6-2676-01A	TCGA-A6-2676	Primary Tumor	Adenocarcinoma, NOS	Dead	1305	711	white	female	75	no	T4	N0	M0	Colon Mucinous Adenocarcinoma	MSI/CIMP	1 - right colon	MSI-H	CIMP.H	1	1	NO	NO	M0	NO
TCGA-AA-3542-01A	TCGA-AA-3542	Primary Tumor	Adenocarcinoma, NOS	Alive	NA	395	not reported	male	69	no	T3	N2	M0	Colon Adenocarcinoma	CIN	3 - left colon	MSS	Cluster4	0	0	YES	NO	M0	YES
TCGA-AA-3867-01A	TCGA-AA-3867	Primary Tumor	Adenocarcinoma, NOS	Alive	NA	731	not reported	male	74	yes	T3	N2	M1	Colon Adenocarcinoma	CIN	3 - left colon	MSS	Cluster4	0	0	YES	NO	M1	YES
TCGA-D5-5537-01A	TCGA-D5-5537	Primary Tumor	Adenocarcinoma, NOS	Dead	1381	456	white	male	83	no	T3	N2	MX	NA	NA	NA	NA	NA	NA	NA	NA	NA	NA	NA
TCGA-AA-3553-01A	TCGA-AA-3553	Primary Tumor	Adenocarcinoma, NOS	Alive	NA	730	not reported	female	61	no	T2	N0	M0	Colon Adenocarcinoma	CIN	3 - left colon	MSI-L	Cluster4	0	0	NO	NO	M0	YES
TCGA-D5-6923-01A	TCGA-D5-6923	Primary Tumor	Adenocarcinoma, NOS	Alive	NA	378	white	male	57	no	T2	N0	M0	NA	NA	NA	NA	NA	NA	NA	NA	NA	NA	NA
TCGA-AD-A5EJ-01A	TCGA-AD-A5EJ	Primary Tumor	Adenocarcinoma, NOS	Alive	NA	0	black or african american	female	74	no	T3	N0	MX	NA	NA	NA	NA	NA	NA	NA	NA	NA	NA	NA
TCGA-G4-6297-01A	TCGA-G4-6297	Primary Tumor	Adenocarcinoma, NOS	Alive	NA	2506	white	female	55	no	T3	N2	M1	NA	NA	NA	NA	NA	NA	NA	NA	NA	NA	NA
TCGA-A6-A567-01A	TCGA-A6-A567	Primary Tumor	Adenocarcinoma, NOS	Dead	1881	NA	black or african american	male	56	no	T3	N1	M1	NA	NA	NA	NA	NA	NA	NA	NA	NA	NA	NA
TCGA-A6-6140-01A	TCGA-A6-6140	Primary Tumor	Adenocarcinoma, NOS	Alive	NA	734	white	male	62	no	T3	N0	M0	NA	NA	NA	NA	NA	NA	NA	NA	NA	NA	NA
TCGA-F4-6855-01A	TCGA-F4-6855	Primary Tumor	Adenocarcinoma, NOS	Alive	NA	1442	white	female	70	no	T3	N0	M0	NA	NA	NA	NA	NA	NA	NA	NA	NA	NA	NA
TCGA-D5-6537-01A	TCGA-D5-6537	Primary Tumor	Adenocarcinoma, NOS	Dead	146	137	white	male	64	no	T3	N1a	MX	NA	NA	NA	NA	NA	NA	NA	NA	NA	NA	NA
TCGA-AA-3845-01A	TCGA-AA-3845	Primary Tumor	Adenocarcinoma, NOS	Dead	0	NA	not reported	female	86	no	T3	N0	M0	NA	MSI/CIMP	1 - right colon	MSI-H	CIMP.H	1	1	YES	NA	M0	NO
TCGA-CA-6715-01A	TCGA-CA-6715	Primary Tumor	Papillary adenocarcinoma, NOS	Alive	NA	383	asian	male	63	no	T3	N1	M0	NA	NA	NA	NA	NA	NA	NA	NA	NA	NA	NA
TCGA-G4-6293-01A	TCGA-G4-6293	Primary Tumor	Adenocarcinoma, NOS	Alive	NA	4051	white	female	49	no	T3	N1	M0	NA	NA	NA	NA	NA	NA	NA	NA	NA	NA	NA
TCGA-AA-3525-01A	TCGA-AA-3525	Primary Tumor	Adenocarcinoma, NOS	Alive	NA	1	not reported	male	90	yes	T3	N1	M0	Colon Adenocarcinoma	MSI/CIMP	1 - right colon	MSI-H	CIMP.H	1	1	NO	NO	M0	NO
TCGA-CM-4744-01A	TCGA-CM-4744	Primary Tumor	Adenocarcinoma, NOS	Alive	NA	609	white	male	69	no	T2	N0	M0	Colon Adenocarcinoma	NA	1 - right colon	MSS	NA	NA	NA	YES	YES	M0	YES
TCGA-A6-2671-11A	TCGA-A6-2671	Solid Tissue Normal	Adenocarcinoma, NOS	Dead	1331	1126	white	male	85	no	T3	N2	M1	NA	NA	NA	NA	NA	NA	NA	NA	NA	NA	NA
TCGA-AA-3685-01A	TCGA-AA-3685	Primary Tumor	Adenocarcinoma, NOS	Alive	NA	1127	not reported	male	69	no	T3	N0	M0	Colon Adenocarcinoma	Invasive	3 - left colon	MSS	Cluster4	0	0	YES	NO	M0	YES
TCGA-AY-6386-01A	TCGA-AY-6386	Primary Tumor	Adenocarcinoma, NOS	Alive	NA	542	black or african american	female	66	no	T3	N1a	M0	NA	NA	NA	NA	NA	NA	NA	NA	NA	NA	NA
TCGA-G4-6315-01A	TCGA-G4-6315	Primary Tumor	Adenocarcinoma, NOS	Alive	NA	1883	white	male	66	no	T3	N1	M1	NA	NA	NA	NA	NA	NA	NA	NA	NA	NA	NA
TCGA-DM-A28C-01A	TCGA-DM-A28C	Primary Tumor	Adenocarcinoma, NOS	Dead	2475	2475	white	male	74	no	T3	N0	M0	NA	NA	NA	NA	NA	NA	NA	NA	NA	NA	NA
TCGA-AZ-6608-01A	TCGA-AZ-6608	Primary Tumor	Adenocarcinoma, NOS	Dead	59	NA	white	female	55	yes	T2	N1	M0	NA	NA	NA	NA	NA	NA	NA	NA	NA	NA	NA
TCGA-AA-3666-01A	TCGA-AA-3666	Primary Tumor	Adenocarcinoma, NOS	Dead	61	NA	not reported	male	68	no	T3	N1	M0	Colon Adenocarcinoma	Invasive	1 - right colon	MSS	Cluster4	0	0	NO	NO	M0	NO
TCGA-CK-5913-01A	TCGA-CK-5913	Primary Tumor	Adenocarcinoma, NOS	Alive	NA	1561	white	female	58	no	T3	N0	MX	NA	NA	NA	NA	NA	NA	NA	NA	NA	NA	NA
TCGA-A6-6650-01B	TCGA-A6-6650	Primary Tumor	Adenocarcinoma, NOS	Alive	NA	627	black or african american	female	69	no	T3	N0	M0	NA	NA	NA	NA	NA	NA	NA	NA	NA	NA	NA
TCGA-AA-3488-01A	TCGA-AA-3488	Primary Tumor	Adenocarcinoma, NOS	Dead	153	NA	not reported	male	58	no	T3	N2	M1	Colon Adenocarcinoma	NA	3 - left colon	MSS	NA	NA	NA	NA	NA	M1	NO
TCGA-AA-3667-01A	TCGA-AA-3667	Primary Tumor	Adenocarcinoma, NOS	Alive	NA	426	not reported	female	36	no	T2	N0	M0	Colon Adenocarcinoma	CIN	3 - left colon	MSI-L	Cluster4	0	0	NO	NO	M0	NO
TCGA-CM-5862-01A	TCGA-CM-5862	Primary Tumor	Adenocarcinoma, NOS	Dead	153	NA	white	male	80	no	T3	N1a	M1a	NA	NA	NA	NA	NA	NA	NA	NA	NA	NA	NA
TCGA-D5-6924-01A	TCGA-D5-6924	Primary Tumor	Adenocarcinoma, NOS	Alive	NA	435	white	male	68	no	T3	N0	M0	NA	NA	NA	NA	NA	NA	NA	NA	NA	NA	NA
TCGA-AA-3842-01A	TCGA-AA-3842	Primary Tumor	Adenocarcinoma, NOS	Alive	NA	1126	not reported	male	51	no	T2	N1	M0	Colon Adenocarcinoma	MSI/CIMP	3 - left colon	MSS	CIMP.L	0	0	YES	YES	M0	YES
TCGA-5M-AAT6-01A	TCGA-5M-AAT6	Primary Tumor	Adenocarcinoma, NOS	Dead	290	NA	black or african american	female	40	no	T4a	N2b	M1a	NA	NA	NA	NA	NA	NA	NA	NA	NA	NA	NA
TCGA-AA-3872-01A	TCGA-AA-3872	Primary Tumor	Adenocarcinoma, NOS	Alive	NA	0	not reported	male	45	no	T4	N2	M1	Colon Adenocarcinoma	MSI/CIMP	3 - left colon	MSS	Cluster4	0	0	YES	YES	M1	NO
TCGA-AA-3949-01A	TCGA-AA-3949	Primary Tumor	Mucinous adenocarcinoma	Alive	NA	791	not reported	female	87	no	T3	N1	M0	Colon Mucinous Adenocarcinoma	MSI/CIMP	1 - right colon	MSI-H	CIMP.H	1	1	NO	NO	M0	NO
TCGA-DM-A28E-01A	TCGA-DM-A28E	Primary Tumor	Adenocarcinoma, NOS	Alive	NA	3648	white	female	72	no	T3	N0	M0	NA	NA	NA	NA	NA	NA	NA	NA	NA	NA	NA
TCGA-CK-4950-01A	TCGA-CK-4950	Primary Tumor	Mucinous adenocarcinoma	Alive	NA	2599	black or african american	female	68	no	T3	N1	M0	NA	NA	NA	NA	NA	NA	NA	NA	NA	NA	NA
TCGA-CA-5796-01A	TCGA-CA-5796	Primary Tumor	Mucinous adenocarcinoma	Alive	NA	377	asian	female	52	no	T3	N0	M0	NA	NA	NA	NA	NA	NA	NA	NA	NA	NA	NA
TCGA-AA-3858-01A	TCGA-AA-3858	Primary Tumor	Adenocarcinoma, NOS	Alive	NA	945	not reported	male	67	no	T2	N0	M0	Colon Adenocarcinoma	CIN	3 - left colon	MSS	Cluster3	0	0	YES	YES	M0	YES
TCGA-AA-3814-01A	TCGA-AA-3814	Primary Tumor	Adenocarcinoma with mixed subtypes	Alive	NA	0	not reported	female	85	yes	T3	N0	M0	Colon Adenocarcinoma	MSI/CIMP	1 - right colon	MSS	Cluster3	0	0	YES	YES	M0	NO
TCGA-AA-A01F-01A	TCGA-AA-A01F	Primary Tumor	Adenocarcinoma, NOS	Alive	NA	974	not reported	male	72	no	T3	N1	M0	Colon Adenocarcinoma	CIN	3 - left colon	MSS	Cluster3	0	0	YES	NO	M0	YES
TCGA-AA-3855-01A	TCGA-AA-3855	Primary Tumor	Adenocarcinoma, NOS	Alive	NA	975	not reported	male	72	no	T2	N0	M0	Colon Adenocarcinoma	Invasive	3 - left colon	MSI-L	CIMP.L	0	0	YES	YES	M0	YES
TCGA-D5-6539-01A	TCGA-D5-6539	Primary Tumor	Adenocarcinoma, NOS	Alive	NA	380	white	female	45	no	T3	N0	M0	NA	NA	NA	NA	NA	NA	NA	NA	NA	NA	NA
TCGA-DM-A28K-01A	TCGA-DM-A28K	Primary Tumor	Mucinous adenocarcinoma	Alive	NA	2988	white	male	75	no	T3	N0	M0	NA	NA	NA	NA	NA	NA	NA	NA	NA	NA	NA
TCGA-AA-3941-01A	TCGA-AA-3941	Primary Tumor	Adenocarcinoma, NOS	Alive	NA	730	not reported	female	84	no	T4	N1b	M1a	Colon Adenocarcinoma	Invasive	1 - right colon	MSI-L	CIMP.H	0	0	YES	NO	M1a	NO
TCGA-T9-A92H-01A	TCGA-T9-A92H	Primary Tumor	Adenocarcinoma, NOS	Alive	NA	362	black or african american	male	82	no	T3	N0	M0	NA	NA	NA	NA	NA	NA	NA	NA	NA	NA	NA
TCGA-AA-3496-01A	TCGA-AA-3496	Primary Tumor	Adenocarcinoma, NOS	Alive	NA	31	not reported	female	83	yes	T3	N0	M0	NA	NA	NA	NA	NA	NA	NA	NA	NA	NA	NA
TCGA-AA-3509-01A	TCGA-AA-3509	Primary Tumor	Adenocarcinoma, NOS	Alive	NA	1915	not reported	female	54	no	T3	N0	M0	Colon Adenocarcinoma	NA	3 - left colon	MSS	NA	NA	NA	NA	NA	M0	NO
TCGA-AZ-4616-01A	TCGA-AZ-4616	Primary Tumor	Adenocarcinoma, NOS	Dead	156	NA	white	female	82	no	T3	N2	M1	NA	NA	NA	NA	NA	NA	NA	NA	NA	NA	NA
TCGA-CM-5861-01A	TCGA-CM-5861	Primary Tumor	Adenocarcinoma, NOS	Alive	NA	457	white	female	63	no	T3	N0	M0	NA	NA	NA	NA	NA	NA	NA	NA	NA	NA	NA
TCGA-G4-6627-01A	TCGA-G4-6627	Primary Tumor	Adenocarcinoma, NOS	Alive	NA	2175	white	male	84	no	T3	N0	M0	NA	NA	NA	NA	NA	NA	NA	NA	NA	NA	NA
TCGA-F4-6459-01A	TCGA-F4-6459	Primary Tumor	Adenocarcinoma, NOS	Dead	262	0	white	female	61	no	T3	N2a	M0	NA	NA	NA	NA	NA	NA	NA	NA	NA	NA	NA
TCGA-AZ-6603-01A	TCGA-AZ-6603	Primary Tumor	Adenocarcinoma, NOS	Dead	899	NA	white	female	77	no	T2	N1	MX	NA	NA	NA	NA	NA	NA	NA	NA	NA	NA	NA
TCGA-AA-3692-01A	TCGA-AA-3692	Primary Tumor	Mucinous adenocarcinoma	Dead	1095	0	not reported	female	47	yes	T3	N2	M1	Colon Mucinous Adenocarcinoma	Invasive	3 - left colon	MSI-L	Cluster4	0	0	NO	NO	M1	YES
TCGA-AA-3680-01A	TCGA-AA-3680	Primary Tumor	Adenocarcinoma, NOS	Dead	335	0	not reported	female	67	no	T4	N2	M1	Colon Adenocarcinoma	Invasive	1 - right colon	MSI-L	CIMP.L	0	0	YES	NO	M1	NO
TCGA-AA-3510-01A	TCGA-AA-3510	Primary Tumor	Adenocarcinoma, NOS	Alive	NA	1946	not reported	male	70	no	T3	N0	M0	Colon Adenocarcinoma	NA	2 - transverse colon	MSS	NA	NA	NA	NO	NO	M0	YES
TCGA-AA-3663-01A	TCGA-AA-3663	Primary Tumor	Adenocarcinoma, NOS	Alive	NA	212	not reported	male	42	no	T3	N0	M0	NA	NA	NA	NA	NA	NA	NA	NA	NA	NA	NA
TCGA-AD-6964-01A	TCGA-AD-6964	Primary Tumor	Adenocarcinoma, NOS	Dead	331	23	white	male	58	yes	T4a	N2b	NA	NA	NA	NA	NA	NA	NA	NA	NA	NA	NA	NA
TCGA-G4-6317-01A	TCGA-G4-6317	Primary Tumor	Adenocarcinoma, NOS	Alive	NA	1095	white	female	51	no	T3	N2	MX	NA	NA	NA	NA	NA	NA	NA	NA	NA	NA	NA
TCGA-AA-A00Q-01A	TCGA-AA-A00Q	Primary Tumor	Adenocarcinoma, NOS	Alive	NA	1278	not reported	female	66	no	T4	N1	M0	Colon Adenocarcinoma	CIN	3 - left colon	MSS	CIMP.L	0	0	YES	NO	M0	NO
TCGA-NH-A50T-01A	TCGA-NH-A50T	Primary Tumor	Adenocarcinoma, NOS	Alive	NA	553	black or african american	female	68	no	T3	N0	MX	NA	NA	NA	NA	NA	NA	NA	NA	NA	NA	NA
TCGA-G4-6322-01A	TCGA-G4-6322	Primary Tumor	Mucinous adenocarcinoma	Alive	NA	792	white	male	65	no	T3	N1	MX	NA	NA	NA	NA	NA	NA	NA	NA	NA	NA	NA
TCGA-AZ-6598-01A	TCGA-AZ-6598	Primary Tumor	Adenocarcinoma, NOS	Dead	1503	NA	white	female	77	no	T3	N0	MX	NA	NA	NA	NA	NA	NA	NA	NA	NA	NA	NA
TCGA-AD-6899-01A	TCGA-AD-6899	Primary Tumor	Mucinous adenocarcinoma	Dead	176	48	white	male	84	no	T4a	N2b	MX	NA	NA	NA	NA	NA	NA	NA	NA	NA	NA	NA
TCGA-AA-3684-01A	TCGA-AA-3684	Primary Tumor	Mucinous adenocarcinoma	Alive	NA	0	not reported	female	65	no	T4	N2	M1	Colon Mucinous Adenocarcinoma	MSI/CIMP	1 - right colon	MSS	CIMP.L	0	0	YES	NO	M1	YES
TCGA-AA-3531-01A	TCGA-AA-3531	Primary Tumor	Adenocarcinoma, NOS	Alive	NA	1035	not reported	female	75	yes	T3	N0	M0	Colon Adenocarcinoma	CIN	3 - left colon	MSI-L	Cluster4	0	0	NO	NO	M0	NO
TCGA-WS-AB45-01A	TCGA-WS-AB45	Primary Tumor	Mucinous adenocarcinoma	Alive	NA	2130	black or african american	female	52	no	T3	N0	MX	NA	NA	NA	NA	NA	NA	NA	NA	NA	NA	NA
TCGA-A6-A566-01A	TCGA-A6-A566	Primary Tumor	Mucinous adenocarcinoma	Dead	758	NA	black or african american	female	55	no	T4	N1	M0	NA	NA	NA	NA	NA	NA	NA	NA	NA	NA	NA
TCGA-AZ-4681-01A	TCGA-AZ-4681	Primary Tumor	Adenocarcinoma, NOS	Alive	NA	3247	white	female	79	no	T3	N0	M0	NA	NA	NA	NA	NA	NA	NA	NA	NA	NA	NA
TCGA-AA-3715-01A	TCGA-AA-3715	Primary Tumor	Adenosquamous carcinoma	Dead	579	30	not reported	male	77	yes	T3	N0	M0	Colon Adenocarcinoma	MSI/CIMP	1 - right colon	MSI-H	CIMP.H	1	1	YES	NA	M0	YES
TCGA-CM-6161-01A	TCGA-CM-6161	Primary Tumor	Adenocarcinoma, NOS	Alive	NA	457	white	female	36	no	T2	N0	M0	NA	NA	NA	NA	NA	NA	NA	NA	NA	NA	NA
TCGA-A6-2672-01A	TCGA-A6-2672	Primary Tumor	Adenocarcinoma, NOS	Alive	NA	1419	white	female	82	no	T3	N1	M0	Colon Adenocarcinoma	MSI/CIMP	2 - transverse colon	MSI-H	CIMP.H	1	1	YES	YES	M0	YES
TCGA-AA-3548-01A	TCGA-AA-3548	Primary Tumor	Adenocarcinoma, NOS	Alive	NA	1034	not reported	female	71	no	T3	N2	M0	Colon Adenocarcinoma	CIN	1 - right colon	MSS	Cluster3	0	0	YES	NO	M0	NO
TCGA-AA-3831-01A	TCGA-AA-3831	Primary Tumor	Adenocarcinoma, NOS	Alive	NA	547	not reported	male	66	no	T3	N0	M0	Colon Adenocarcinoma	Invasive	3 - left colon	MSS	CIMP.L	0	0	YES	YES	M0	NO
TCGA-AA-A00W-01A	TCGA-AA-A00W	Primary Tumor	Adenocarcinoma, NOS	Alive	NA	456	not reported	male	80	no	T1	N0	M0	Colon Adenocarcinoma	Invasive	3 - left colon	MSS	Cluster3	0	0	NO	NO	M0	YES
TCGA-CM-6168-01A	TCGA-CM-6168	Primary Tumor	Adenocarcinoma, NOS	Alive	NA	395	black or african american	female	84	no	T3	N0	M0	NA	NA	NA	NA	NA	NA	NA	NA	NA	NA	NA
TCGA-D5-6538-01A	TCGA-D5-6538	Primary Tumor	Adenocarcinoma, NOS	Alive	NA	521	white	female	79	no	T3	N2	M0	NA	NA	NA	NA	NA	NA	NA	NA	NA	NA	NA
TCGA-AA-3525-11A	TCGA-AA-3525	Solid Tissue Normal	Adenocarcinoma, NOS	Alive	NA	1	not reported	male	90	yes	T3	N1	M0	NA	NA	NA	NA	NA	NA	NA	NA	NA	NA	NA
TCGA-A6-2685-11A	TCGA-A6-2685	Solid Tissue Normal	Adenocarcinoma, NOS	Alive	NA	1133	black or african american	female	48	no	T3	N0	M0	NA	NA	NA	NA	NA	NA	NA	NA	NA	NA	NA
TCGA-CM-6675-01A	TCGA-CM-6675	Primary Tumor	Adenocarcinoma, NOS	Alive	NA	397	black or african american	male	35	no	T3	N2b	M1b	NA	NA	NA	NA	NA	NA	NA	NA	NA	NA	NA
TCGA-AD-6890-01A	TCGA-AD-6890	Primary Tumor	Adenocarcinoma, NOS	Alive	NA	746	white	male	65	no	T1	N0	MX	NA	NA	NA	NA	NA	NA	NA	NA	NA	NA	NA
TCGA-DM-A1D8-01A	TCGA-DM-A1D8	Primary Tumor	Adenocarcinoma, NOS	Dead	383	383	white	female	50	no	T3	N1	NA	NA	NA	NA	NA	NA	NA	NA	NA	NA	NA	NA
TCGA-AA-3517-01A	TCGA-AA-3517	Primary Tumor	Adenocarcinoma, NOS	Alive	NA	1186	not reported	male	60	no	T3	N0	M0	Colon Adenocarcinoma	CIN	3 - left colon	MSI-L	Cluster4	0	0	NO	NO	M0	YES
TCGA-NH-A8F7-01A	TCGA-NH-A8F7	Primary Tumor	Adenocarcinoma, NOS	Alive	NA	543	black or african american	female	53	no	T3	N0	MX	NA	NA	NA	NA	NA	NA	NA	NA	NA	NA	NA
TCGA-CM-6679-01A	TCGA-CM-6679	Primary Tumor	Adenocarcinoma, NOS	Alive	NA	306	white	male	58	no	T3	N0	M0	NA	NA	NA	NA	NA	NA	NA	NA	NA	NA	NA
TCGA-DM-A0XF-01A	TCGA-DM-A0XF	Primary Tumor	Adenocarcinoma, NOS	Dead	1162	NA	white	female	68	no	T3	N2	M0	NA	NA	NA	NA	NA	NA	NA	NA	NA	NA	NA
TCGA-AA-A01V-01A	TCGA-AA-A01V	Primary Tumor	Adenocarcinoma, NOS	Alive	NA	31	not reported	male	59	no	T2	N0	M0	Colon Adenocarcinoma	NA	1 - right colon	MSS	CIMP.L	0	0	NA	NA	M0	NO
TCGA-CM-5348-01A	TCGA-CM-5348	Primary Tumor	Adenocarcinoma, NOS	Alive	NA	699	white	male	72	no	T3	N1a	M0	NA	NA	NA	NA	NA	NA	NA	NA	NA	NA	NA
TCGA-AA-A01D-01A	TCGA-AA-A01D	Primary Tumor	Mucinous adenocarcinoma	Dead	334	30	not reported	female	47	no	T3	N2	M0	Colon Mucinous Adenocarcinoma	MSI/CIMP	3 - left colon	MSS	CIMP.L	0	0	YES	NO	M0	NO
TCGA-F4-6807-01A	TCGA-F4-6807	Primary Tumor	Adenocarcinoma, NOS	Alive	NA	1309	white	female	51	no	T3	N2b	M0	NA	NA	NA	NA	NA	NA	NA	NA	NA	NA	NA
TCGA-D5-7000-01A	TCGA-D5-7000	Primary Tumor	Mucinous adenocarcinoma	Alive	NA	312	white	female	79	no	T2	N0	M0	NA	NA	NA	NA	NA	NA	NA	NA	NA	NA	NA
TCGA-AA-3818-01A	TCGA-AA-3818	Primary Tumor	Adenocarcinoma, NOS	Dead	30	NA	not reported	female	78	no	T3	N0	M0	Colon Adenocarcinoma	Invasive	1 - right colon	MSS	CIMP.L	0	0	NO	NO	M0	NO
TCGA-AA-A01T-01A	TCGA-AA-A01T	Primary Tumor	Adenocarcinoma, NOS	Alive	NA	1005	not reported	female	63	no	T3	N1	M0	Colon Adenocarcinoma	NA	3 - left colon	MSS	Cluster3	0	0	YES	NA	M0	NO
TCGA-A6-6141-01A	TCGA-A6-6141	Primary Tumor	Adenocarcinoma, NOS	Alive	NA	255	black or african american	male	31	no	T3	N0	M0	NA	NA	NA	NA	NA	NA	NA	NA	NA	NA	NA
TCGA-F4-6703-01A	TCGA-F4-6703	Primary Tumor	Adenocarcinoma, NOS	Alive	NA	1456	white	male	64	no	T3	N0	M0	NA	NA	NA	NA	NA	NA	NA	NA	NA	NA	NA
TCGA-AA-3968-01A	TCGA-AA-3968	Primary Tumor	Adenocarcinoma, NOS	Alive	NA	669	not reported	female	55	no	T2	N0	M0	Colon Adenocarcinoma	CIN	3 - left colon	MSS	Cluster3	0	NA	NO	NO	M0	NO
TCGA-AA-3947-01A	TCGA-AA-3947	Primary Tumor	Mucinous adenocarcinoma	Alive	NA	1004	not reported	female	60	no	T4	N0	M0	Colon Mucinous Adenocarcinoma	MSI/CIMP	1 - right colon	MSI-H	CIMP.H	1	1	NO	NO	M0	YES
TCGA-CM-6166-01A	TCGA-CM-6166	Primary Tumor	Adenocarcinoma, NOS	Alive	NA	669	white	female	48	no	T2	N0	M0	NA	NA	NA	NA	NA	NA	NA	NA	NA	NA	NA
TCGA-AA-3560-01A	TCGA-AA-3560	Primary Tumor	Adenocarcinoma, NOS	Alive	NA	608	not reported	female	72	yes	T3	N2	M0	Colon Adenocarcinoma	CIN	3 - left colon	MSS	Cluster3	0	0	YES	NO	M0	YES
TCGA-AU-6004-01A	TCGA-AU-6004	Primary Tumor	Adenocarcinoma, NOS	Alive	NA	824	white	female	69	no	T2	N0	M0	NA	NA	NA	NA	NA	NA	NA	NA	NA	NA	NA
TCGA-AA-A03F-01A	TCGA-AA-A03F	Primary Tumor	Mucinous adenocarcinoma	Dead	0	0	not reported	female	90	no	T3	N2	M0	Colon Mucinous Adenocarcinoma	NA	1 - right colon	MSS	CIMP.H	0	0	NA	NA	M0	NO
TCGA-AA-3522-01A	TCGA-AA-3522	Primary Tumor	Adenocarcinoma, NOS	Alive	NA	1127	not reported	male	67	yes	T3	N0	M0	Colon Adenocarcinoma	Invasive	1 - right colon	MSS	CIMP.L	0	0	YES	NO	M0	YES
TCGA-G4-6320-01A	TCGA-G4-6320	Primary Tumor	Adenocarcinoma, NOS	Alive	NA	804	white	male	73	no	T3	N1	MX	NA	NA	NA	NA	NA	NA	NA	NA	NA	NA	NA
TCGA-AA-A02J-01A	TCGA-AA-A02J	Primary Tumor	Adenocarcinoma, NOS	Dead	153	NA	not reported	female	70	no	T3	N0	M1	Colon Adenocarcinoma	CIN	3 - left colon	MSS	Cluster4	0	0	YES	YES	M1	NO
TCGA-A6-5661-01B	TCGA-A6-5661	Primary Tumor	Adenocarcinoma, NOS	Alive	NA	1020	black or african american	female	80	no	T3	N0	M0	NA	NA	NA	NA	NA	NA	NA	NA	NA	NA	NA
TCGA-AA-3695-01A	TCGA-AA-3695	Primary Tumor	Adenocarcinoma, NOS	Alive	NA	0	not reported	female	63	no	T3	N2	M1	NA	NA	NA	NA	NA	NA	NA	NA	NA	NA	NA
TCGA-AY-4070-01A	TCGA-AY-4070	Primary Tumor	Adenocarcinoma, NOS	Dead	496	NA	black or african american	female	50	no	T3	N2	M0	Colon Adenocarcinoma	CIN	1 - right colon	MSS	Cluster3	0	0	YES	YES	M0	NO
TCGA-NH-A6GC-01A	TCGA-NH-A6GC	Primary Tumor	Mucinous adenocarcinoma	Alive	NA	389	black or african american	female	66	no	T4b	N1b	M1b	NA	NA	NA	NA	NA	NA	NA	NA	NA	NA	NA
TCGA-CM-6165-01A	TCGA-CM-6165	Primary Tumor	Adenocarcinoma, NOS	Alive	NA	488	white	male	74	no	T3	N0	M0	NA	NA	NA	NA	NA	NA	NA	NA	NA	NA	NA
TCGA-A6-5661-01A	TCGA-A6-5661	Primary Tumor	Adenocarcinoma, NOS	Alive	NA	1020	black or african american	female	80	no	T3	N0	M0	NA	NA	NA	NA	NA	NA	NA	NA	NA	NA	NA
TCGA-CM-4750-01A	TCGA-CM-4750	Primary Tumor	Adenocarcinoma, NOS	Alive	NA	244	white	female	34	no	T1	N1b	M0	Colon Adenocarcinoma	NA	NA	MSI-L	NA	NA	NA	YES	NO	M0	YES
TCGA-AA-A01Z-01A	TCGA-AA-A01Z	Primary Tumor	Adenocarcinoma, NOS	Alive	NA	1126	not reported	male	68	no	T3	N0	M0	Colon Adenocarcinoma	NA	1 - right colon	MSS	CIMP.L	0	0	YES	NA	M0	YES
TCGA-CK-6746-01A	TCGA-CK-6746	Primary Tumor	Adenocarcinoma, NOS	Alive	NA	0	white	female	84	no	T4b	N0	MX	NA	NA	NA	NA	NA	NA	NA	NA	NA	NA	NA
TCGA-A6-4107-01A	TCGA-A6-4107	Primary Tumor	Adenocarcinoma, NOS	Alive	NA	987	white	female	57	no	T3	N1b	M0	Colon Adenocarcinoma	NA	1 - right colon	MSS	NA	NA	NA	YES	NO	M0	NO
TCGA-AA-3516-01A	TCGA-AA-3516	Primary Tumor	Mucinous adenocarcinoma	Dead	396	0	not reported	female	74	yes	T3	N2	M0	Colon Mucinous Adenocarcinoma	MSI/CIMP	1 - right colon	MSI-H	CIMP.H	1	1	NO	NO	M0	NO
TCGA-AA-3811-01A	TCGA-AA-3811	Primary Tumor	Adenocarcinoma with neuroendocrine differentiation	Dead	306	30	not reported	female	84	no	T3	N2	M0	Colon Adenocarcinoma	MSI/CIMP	1 - right colon	MSI-H	Cluster4	1	1	YES	YES	M0	NO
TCGA-AA-A02E-01A	TCGA-AA-A02E	Primary Tumor	Adenocarcinoma, NOS	Dead	90	NA	not reported	female	82	no	T3	N1	M1	Colon Adenocarcinoma	CIN	1 - right colon	MSI-L	Cluster3	0	NA	YES	YES	M1	NO
TCGA-CK-4948-01B	TCGA-CK-4948	Primary Tumor	Adenocarcinoma, NOS	Alive	NA	4502	white	female	45	no	T3	N1	M0	NA	NA	NA	NA	NA	NA	NA	NA	NA	NA	NA
TCGA-AZ-6605-01A	TCGA-AZ-6605	Primary Tumor	Adenocarcinoma, NOS	Dead	159	NA	white	male	77	no	T4	N1	M0	NA	NA	NA	NA	NA	NA	NA	NA	NA	NA	NA
TCGA-DM-A1D0-01A	TCGA-DM-A1D0	Primary Tumor	Adenocarcinoma, NOS	Alive	NA	3974	white	female	79	no	T3	N0	M0	NA	NA	NA	NA	NA	NA	NA	NA	NA	NA	NA
TCGA-A6-5656-01A	TCGA-A6-5656	Primary Tumor	Adenocarcinoma, NOS	Alive	NA	1001	white	male	74	no	T2	N0	M0	NA	NA	NA	NA	NA	NA	NA	NA	NA	NA	NA
TCGA-DM-A280-01A	TCGA-DM-A280	Primary Tumor	Mucinous adenocarcinoma	Dead	236	236	white	female	70	no	T3	N0	M0	NA	NA	NA	NA	NA	NA	NA	NA	NA	NA	NA
TCGA-AA-A02Y-01A	TCGA-AA-A02Y	Primary Tumor	Adenocarcinoma, NOS	Alive	NA	1216	not reported	male	73	no	T2	N0	M0	Colon Adenocarcinoma	NA	1 - right colon	MSS	CIMP.L	0	0	YES	YES	M0	NO
TCGA-CK-6747-01A	TCGA-CK-6747	Primary Tumor	Adenocarcinoma, NOS	Alive	NA	820	white	female	87	no	T3	N0	MX	NA	NA	NA	NA	NA	NA	NA	NA	NA	NA	NA
TCGA-AZ-4682-01B	TCGA-AZ-4682	Primary Tumor	Adenocarcinoma, NOS	Dead	680	NA	white	male	61	no	T3	N0	M1	Colon Adenocarcinoma	NA	3 - left colon	MSS	NA	NA	NA	NO	NO	M1	NA
TCGA-QG-A5YW-01A	TCGA-QG-A5YW	Primary Tumor	Adenocarcinoma, NOS	Alive	NA	896	black or african american	female	55	no	T3	N2b	MX	NA	NA	NA	NA	NA	NA	NA	NA	NA	NA	NA
TCGA-CM-4746-01A	TCGA-CM-4746	Primary Tumor	Adenocarcinoma, NOS	Alive	NA	1126	black or african american	male	61	no	T2	N0	M0	Colon Adenocarcinoma	NA	3 - left colon	MSI-H	NA	NA	NA	NO	NO	M0	YES
TCGA-QL-A97D-01A	TCGA-QL-A97D	Primary Tumor	Adenocarcinoma, NOS	Alive	NA	666	black or african american	female	84	no	T2	N0	MX	NA	NA	NA	NA	NA	NA	NA	NA	NA	NA	NA
TCGA-G4-6314-01A	TCGA-G4-6314	Primary Tumor	Adenocarcinoma, NOS	Alive	NA	1093	white	female	76	yes	T3	N2	M1	NA	NA	NA	NA	NA	NA	NA	NA	NA	NA	NA
TCGA-G4-6299-01A	TCGA-G4-6299	Primary Tumor	Adenocarcinoma, NOS	Alive	NA	2268	white	male	69	no	T3	N2	M0	NA	NA	NA	NA	NA	NA	NA	NA	NA	NA	NA
TCGA-A6-5662-01A	TCGA-A6-5662	Primary Tumor	Adenocarcinoma, NOS	Alive	NA	718	white	male	46	no	T3	N2	M1	NA	NA	NA	NA	NA	NA	NA	NA	NA	NA	NA
TCGA-AZ-4614-01A	TCGA-AZ-4614	Primary Tumor	Adenocarcinoma, NOS	Dead	172	NA	white	female	71	no	T4a	N1	M1	Colon Adenocarcinoma	NA	NA	MSI-L	NA	NA	NA	YES	YES	M1	NA
TCGA-AD-6963-01A	TCGA-AD-6963	Primary Tumor	Adenocarcinoma, NOS	Alive	NA	834	white	male	58	no	T3	N0	MX	NA	NA	NA	NA	NA	NA	NA	NA	NA	NA	NA
TCGA-AA-3870-01A	TCGA-AA-3870	Primary Tumor	Adenocarcinoma, NOS	Alive	NA	912	not reported	female	71	yes	T3	N2	M1	Colon Adenocarcinoma	MSI/CIMP	1 - right colon	MSS	CIMP.H	0	0	YES	NO	M1	YES
TCGA-AA-3846-01A	TCGA-AA-3846	Primary Tumor	Adenocarcinoma, NOS	Alive	NA	518	not reported	female	74	no	T3	N0	M0	Colon Adenocarcinoma	CIN	3 - left colon	MSS	Cluster3	0	0	YES	NA	M0	YES
TCGA-DM-A1D4-01A	TCGA-DM-A1D4	Primary Tumor	Adenocarcinoma, NOS	Dead	2821	2821	white	male	80	no	T3	N0	M0	NA	NA	NA	NA	NA	NA	NA	NA	NA	NA	NA
TCGA-AD-5900-01A	TCGA-AD-5900	Primary Tumor	Mucinous adenocarcinoma	Alive	NA	370	white	male	67	no	T2	N0	MX	NA	NA	NA	NA	NA	NA	NA	NA	NA	NA	NA
TCGA-F4-6463-01A	TCGA-F4-6463	Primary Tumor	Mucinous adenocarcinoma	Alive	NA	1087	white	male	51	no	T3	N0	M0	NA	NA	NA	NA	NA	NA	NA	NA	NA	NA	NA
TCGA-AZ-4313-01A	TCGA-AZ-4313	Primary Tumor	Adenocarcinoma, NOS	Alive	NA	2310	white	female	51	yes	T1	N0	M0	Colon Adenocarcinoma	NA	1 - right colon	MSI-H	NA	NA	NA	YES	YES	M0	NA
TCGA-AY-5543-01A	TCGA-AY-5543	Primary Tumor	Adenocarcinoma, NOS	Alive	NA	1004	black or african american	female	65	no	T3	N1a	M1	NA	NA	NA	NA	NA	NA	NA	NA	NA	NA	NA
TCGA-CM-6674-01A	TCGA-CM-6674	Primary Tumor	Adenocarcinoma, NOS	Alive	NA	394	white	male	39	no	T3	N0	M0	NA	NA	NA	NA	NA	NA	NA	NA	NA	NA	NA
TCGA-AA-3980-01A	TCGA-AA-3980	Primary Tumor	Adenocarcinoma, NOS	Alive	NA	242	not reported	female	89	no	T2	N0	M0	Colon Adenocarcinoma	Invasive	3 - left colon	MSS	Cluster3	0	0	YES	YES	M0	YES
TCGA-AZ-6600-01A	TCGA-AZ-6600	Primary Tumor	Adenocarcinoma, NOS	Dead	368	NA	black or african american	male	64	no	T4	N1	M1	NA	NA	NA	NA	NA	NA	NA	NA	NA	NA	NA
TCGA-5M-AATE-01A	TCGA-5M-AATE	Primary Tumor	Adenocarcinoma, NOS	Alive	NA	1200	black or african american	male	76	no	T3	N0	M0	NA	NA	NA	NA	NA	NA	NA	NA	NA	NA	NA
TCGA-A6-2681-01A	TCGA-A6-2681	Primary Tumor	Adenocarcinoma, NOS	Alive	NA	1387	white	female	73	yes	T3	N0	M0	Colon Adenocarcinoma	NA	1 - right colon	MSS	NA	NA	NA	NO	NO	M0	NO
TCGA-G4-6323-01A	TCGA-G4-6323	Primary Tumor	Adenocarcinoma, NOS	Alive	NA	419	black or african american	male	50	no	Tis	N0	MX	NA	NA	NA	NA	NA	NA	NA	NA	NA	NA	NA
TCGA-A6-3808-01A	TCGA-A6-3808	Primary Tumor	Adenocarcinoma, NOS	Alive	NA	1014	white	male	73	no	T3	N0	M0	Colon Mucinous Adenocarcinoma	MSI/CIMP	1 - right colon	MSI-L	Cluster3	0	0	NO	NO	M0	YES
TCGA-CM-6676-01A	TCGA-CM-6676	Primary Tumor	Adenocarcinoma, NOS	Alive	NA	337	white	male	82	no	T2	N0	M0	NA	NA	NA	NA	NA	NA	NA	NA	NA	NA	NA
TCGA-CM-6171-01A	TCGA-CM-6171	Primary Tumor	Adenocarcinoma, NOS	Alive	NA	427	white	female	77	no	T2	N0	M0	NA	NA	NA	NA	NA	NA	NA	NA	NA	NA	NA
TCGA-NH-A50V-01A	TCGA-NH-A50V	Primary Tumor	Adenocarcinoma, NOS	Alive	NA	588	black or african american	male	69	no	T3	N2a	M0	NA	NA	NA	NA	NA	NA	NA	NA	NA	NA	NA
TCGA-AY-6197-01A	TCGA-AY-6197	Primary Tumor	Adenocarcinoma, NOS	Alive	NA	652	white	male	60	no	T3	N0	NA	NA	NA	NA	NA	NA	NA	NA	NA	NA	NA	NA
TCGA-A6-5657-01A	TCGA-A6-5657	Primary Tumor	Adenocarcinoma, NOS	Alive	NA	962	black or african american	male	65	no	T3	N1	M0	NA	NA	NA	NA	NA	NA	NA	NA	NA	NA	NA
TCGA-A6-4105-01A	TCGA-A6-4105	Primary Tumor	Adenocarcinoma, NOS	Dead	442	NA	white	male	79	yes	T3	N0	M0	NA	NA	NA	NA	NA	NA	NA	NA	NA	NA	NA
TCGA-CK-5915-01A	TCGA-CK-5915	Primary Tumor	Adenocarcinoma, NOS	Alive	NA	0	white	male	63	no	T2	N0	MX	NA	NA	NA	NA	NA	NA	NA	NA	NA	NA	NA
TCGA-F4-6570-01A	TCGA-F4-6570	Primary Tumor	Adenocarcinoma, NOS	Dead	188	0	white	female	78	no	T3	N0	M0	NA	NA	NA	NA	NA	NA	NA	NA	NA	NA	NA
TCGA-D5-5538-01A	TCGA-D5-5538	Primary Tumor	Adenocarcinoma, NOS	Dead	1661	373	white	female	60	no	T3	N1b	M0	NA	NA	NA	NA	NA	NA	NA	NA	NA	NA	NA
TCGA-A6-5656-01B	TCGA-A6-5656	Primary Tumor	Adenocarcinoma, NOS	Alive	NA	1001	white	male	74	no	T2	N0	M0	NA	NA	NA	NA	NA	NA	NA	NA	NA	NA	NA
TCGA-F4-6809-01A	TCGA-F4-6809	Primary Tumor	Adenocarcinoma, NOS	Dead	403	39	white	female	52	no	T3	N1	M1	NA	NA	NA	NA	NA	NA	NA	NA	NA	NA	NA
