# Supplementary material for: The tsRNAs (tRFdb-3013a/b) serve as novel biomarkers for colon adenocarcinomas
Source: Aging (Albany NY). 2024 Mar 6;16(5):4299–326. doi: 10.18632/aging.205590 (PMC10968714; doi:10.18632/aging.205590)
Supplement: Supplementary Table 3 [file aging-16-205590-s005.xlsx]

## Sheet: Table S3
Supplementary Table 3. A summary of the identified tsRNAs with available expression abundance in the datasets of colon adenocarcinomas.
tsRNA	types	median	STDEV	mean	min	max
tRFdb-3012b	3‘-tRF	13.8435	1.79454	13.6933	6.74084	17.1702
tRFdb-3012a	3‘-tRF	14.0929	1.82965	13.9408	7.02789	17.4373
tRFdb-3001a	3‘-tRF	13.251	1.98596	12.9503	5.86095	16.3364
tRFdb-3020a	3‘-tRF	15.7917	1.27357	15.6393	9.8541	18.7378
tRFdb-3029a	3‘-tRF	12.8094	1.80666	12.8016	7.63957	17.3344
tRFdb-3006a	3‘-tRF	11.2936	1.42787	11.296	5.18298	14.807
tRFdb-3006b	3‘-tRF	10.9218	1.42752	10.9245	4.82265	14.435
tRFdb-3029b	3‘-tRF	12.0188	2.02253	12.0121	6.79331	17.0368
tRFdb-3016a	3‘-tRF	11.6209	1.57766	11.5241	6.50838	15.3679
tRFdb-3016b	3‘-tRF	11.4094	1.57747	11.3128	6.29938	15.1564
tRFdb-3003a	3‘-tRF	13.7808	1.90681	13.656	7.78982	17.8862
tRFdb-3003b	3‘-tRF	13.4089	1.90672	13.2843	7.41976	17.5143
tRFdb-3030a	3‘-tRF	14.0584	1.91696	14.1132	7.86989	18.6757
tRFdb-3030b	3‘-tRF	13.7698	1.92607	13.8194	7.58176	18.3842
tRFdb-3015a	3‘-tRF	12.1969	2.26923	11.98	5.29597	17.0159
tRFdb-3015b	3‘-tRF	11.9855	2.26889	11.7687	5.09026	16.8044
tRFdb-3033a	3‘-tRF	10.7493	1.69173	10.6049	5.74199	17.1587
tRFdb-3024a	3‘-tRF	11.9713	2.11736	11.8058	5.58618	17.2625
tRFdb-3025a	3‘-tRF	11.9713	2.11736	11.8058	5.58618	17.2625
tRFdb-3024b	3‘-tRF	11.156	1.89575	11.0643	5.30333	15.5374
tRFdb-3025b	3‘-tRF	11.156	1.89575	11.0643	5.30333	15.5374
tRFdb-5009a	5‘-tRF	13.5037	1.92141	13.4198	7.19942	17.6789
tRFdb-5009b	5‘-tRF	12.8871	1.92118	12.8033	6.58798	17.0622
tRFdb-5009c	5‘-tRF	12.4565	1.92095	12.3728	6.16255	16.6316
ts-50	tRF-1	11.6232	1.91017	11.3851	4.26673	15.0614
tRFdb-5024a	5‘-tRF	13.4736	2.38664	13.4131	6.59827	18.562
tRFdb-5024b	5‘-tRF	13.0418	2.38604	12.9718	6.16301	18.1215
tRFdb-3004a	3‘-tRF	12.508	2.08123	12.7056	6.32992	17.3905
tRFdb-5002a	5‘-tRF	14.2917	2.21972	14.2645	6.53033	18.5264
tRFdb-5002b	5‘-tRF	13.8512	2.22049	13.826	6.09532	18.086
tRFdb-5002c	5‘-tRF	13.1464	2.2331	13.1486	5.40232	17.3836
tRFdb-3023a	3‘-tRF	10.845	2.06226	10.6021	1.86717	15.4199
tRFdb-5012b	5‘-tRF	10.8346	2.25434	10.4889	4.14843	15.8092
tRFdb-5026a	5‘-tRF	14.2486	3.67361	14.0642	5.8313	18.6233
tRFdb-3023b	3‘-tRF	10.4377	2.09421	10.1645	1.60706	14.7368
tRFdb-5013b	5‘-tRF	10.9586	2.29135	10.589	4.00056	15.9404
tRFdb-5016a	5‘-tRF	11.4924	2.65426	11.2877	3.82174	17.5488
tRFdb-1036	tRF-1	11.5416	2.55121	11.4237	2.00045	16.2658
tRFdb-3005a	3‘-tRF	10.3817	1.74642	10.072	4.4831	14.9478
tRFdb-5015a	5‘-tRF	11.3555	2.5673	11.2314	4.01452	17.7019
tRFdb-3017a	3‘-tRF	12.025	2.90756	11.4465	3.26307	16.9337
tRFdb-3004b	3‘-tRF	9.83969	1.85933	9.53066	3.93773	14.5759
tRFdb-3005b	3‘-tRF	9.83969	1.85933	9.53066	3.93773	14.5759
tRFdb-5013c	5‘-tRF	8.9911	1.61133	8.89587	3.12061	14.0792
tRFdb-3007a	3‘-tRF	11.2699	3.02966	11.2494	2.99603	17.5352
tRFdb-3017b	3‘-tRF	11.6682	2.9325	11.1131	3.0751	16.7137
ts-105	tRF-1	11.3194	2.93042	10.7972	2.74456	16.4183
tRFdb-3009b	3‘-tRF	10.1137	1.63477	10.061	4.28114	14.0296
tRFdb-3009a	3‘-tRF	10.3236	1.66129	10.3005	4.55709	14.3191
tRFdb-5005b	5‘-tRF	8.81434	1.83518	8.6341	2.2021	14.1364
tRFdb-5005c	5‘-tRF	8.49812	1.82652	8.32279	1.96511	13.8133
tRFdb-5012a	5‘-tRF	10.9976	2.53367	10.4664	3.53513	16.2202
tRFdb-1024	tRF-1	10.5371	1.6742	10.4959	5.25386	14.5156
tRFdb-3002b	3‘-tRF	9.61018	2.11747	9.46163	3.55878	14.2597
tRFdb-3021a	3‘-tRF	10.2484	1.50035	10.3185	5.78974	14.7672
ts-26	tRF-1	13.1669	2.68051	12.4519	4.77988	16.7541
tRFdb-3002a	3‘-tRF	9.75022	2.07858	9.59405	3.56202	14.5117
tRFdb-5026b	5‘-tRF	14.7251	3.74764	13.9397	5.17079	18.2695
tRFdb-5026c	5‘-tRF	14.2945	3.7469	13.5094	4.75402	17.8389
tRFdb-5011a	5‘-tRF	11.4344	2.73045	10.6518	3.70099	16.7093
ts-36	tRF-1	12.9037	3.40322	12.1012	1.94521	17.498
tRFdb-3022a	3‘-tRF	9.98803	1.79852	9.94094	4.00056	14.4931
tRFdb-3022b	3‘-tRF	9.69884	1.79758	9.65196	3.73094	14.2036
5P_tRNA-Lys-TTT-3-1	5‘U-tRF	8.41162	1.82314	8.32792	1.70085	14.0475
ts-75	tRF-1	10.0928	3.18071	10.3563	2.13296	16.9051
tRFdb-3008b	3‘-tRF	10.4571	2.22367	10.6085	5.1879	16.9164
tRFdb-3008a	3‘-tRF	10.8313	2.2219	10.9874	5.55085	17.2884
tRFdb-3014a	3‘-tRF	9.45922	2.04415	9.30053	1.80778	14.6528
tRFdb-3014b	3‘-tRF	9.17017	2.03708	9.0136	1.60706	14.3633
ts-6	tRF-1	8.52358	1.82376	8.49907	2.9558	14.2654
tRFdb-5020a	5‘-tRF	11.2382	2.43257	10.7043	2.07574	15.2285
ts-110	tRF-1	9.03195	1.79428	9.01501	2.0729	15.244
tRFdb-5027b	5‘-tRF	8.25741	1.48491	8.23617	3.2862	12.3436
ts-42	tRF-1	8.56477	1.82652	8.49144	3.01013	13.9601
tRFdb-5027c	5‘-tRF	7.7968	1.45572	7.76621	2.90611	11.9131
tRFdb-3013a	3‘-tRF	11.4285	2.84796	10.684	2.70659	16.322
tRFdb-3013b	3‘-tRF	11.0567	2.84152	10.3149	2.3982	15.95
tRFdb-3019b	3‘-tRF	9.09206	1.76257	9.11389	4.28114	13.5326
tRFdb-3019a	3‘-tRF	9.37291	1.7612	9.39566	4.55709	13.8221
ts-112	tRF-1	10.4267	2.24243	10.2988	4.04355	15.5757
ts-38	tRF-1	9.91115	2.60444	9.60966	2.17683	16.3393
tRFdb-5001b	5‘-tRF	8.51729	1.52308	8.55641	2.88391	13.0521
tRFdb-3026a	3‘-tRF	8.65223	1.94592	8.60374	2.28669	13.2458
tRFdb-3026b	3‘-tRF	8.36352	1.94187	8.31569	2.06144	12.9563
tRFdb-3027a	3‘-tRF	8.60215	1.69621	8.40658	3.05747	12.3631
ts-9	tRF-1	8.79346	2.08721	8.79193	1.48581	13.9015
ts-47	tRF-1	10.0966	2.53878	9.55181	1.32229	15.1034
ts-48	tRF-1	9.68799	2.39633	9.37031	2.0729	14.2169
tRFdb-3011a	3‘-tRF	8.66528	1.92902	8.59346	1.80778	13.534
tRFdb-3011b	3‘-tRF	8.37657	1.92557	8.30541	1.60706	13.2445
tRFdb-3027b	3‘-tRF	8.21598	1.69574	7.97204	2.73559	11.9912
tRFdb-3021b	3‘-tRF	9.48865	1.82795	9.56834	3.34389	13.9017
ts-58	tRF-1	7.93114	1.83581	7.72721	2.05112	13.1108
tRFdb-5001a	5‘-tRF	8.23502	1.76705	8.19152	2.00045	13.6174
ts-81	tRF-1	7.64414	1.71869	7.57331	2.83956	12.5913
tRFdb-3031b	3‘-tRF	9.76569	1.84758	9.52767	3.85049	14.3416
tRFdb-3031a	3‘-tRF	10.5834	1.84725	10.3419	4.62592	15.161
ts-74	tRF-1	10.4115	2.51743	10.1116	2.16364	14.6501
tRFdb-5017b	5‘-tRF	8.16098	1.78831	8.15495	3.82344	12.8248
tRFdb-5017a	5‘-tRF	9.00766	1.80371	9.01959	4.01452	13.7092
tRFdb-5004c	5‘-tRF	7.31195	1.93776	7.29154	1.94111	11.9822
tRFdb-5010a	5‘-tRF	9.99343	1.91013	9.92422	3.85049	15.0439
tRFdb-5004b	5‘-tRF	7.80062	1.94069	7.78793	2.32245	12.4769
tRFdb-3007b	3‘-tRF	9.4005	2.26687	9.26088	1.60706	14.1525
ts-97	tRF-1	8.08954	1.769	8.02913	3.4259	12.7468
tRFdb-5032a	5‘-tRF	10.6824	2.14229	10.4488	2.28669	14.8659
tRFdb-1030	tRF-1	9.34672	2.0409	9.36891	2.49959	14.8818
ts-56	tRF-1	12.4695	2.75439	12.0915	2.68128	17.1541
ts-55	tRF-1	8.14141	1.73	7.96564	1.92339	11.8755
ts-23	tRF-1	9.81444	1.66367	9.8634	5.53817	13.7604
ts-34	tRF-1	8.76082	2.0755	8.57567	1.44969	13.878
5P_tRNA-iMet-CAT-1-3	5‘U-tRF	9.60562	2.47936	9.41597	2.6468	15.8288
ts-80	tRF-1	8.9881	2.23417	8.86287	1.96732	14.1645
ts-43	tRF-1	10.9319	1.73191	10.766	3.67802	15.0226
ts-109	tRF-1	9.46638	2.14476	9.23465	1.92339	13.1411
tRFdb-5008b	5‘-tRF	7.67926	1.79677	7.54355	1.5643	12.1455
ts-53	tRF-1	11.8348	2.54842	12.0747	2.07574	16.7812
ts-66	tRF-1	8.6264	1.76749	8.39346	3.0342	11.8003
5P_tRNA-Val-CAC-1-1	5‘U-tRF	7.64565	1.89145	7.42375	1.70085	11.7973
ts-95	tRF-1	8.44174	1.55966	8.46121	2.72101	12.0696
5P_tRNA-Pro-AGG-2-1	5‘U-tRF	7.43082	1.70004	7.3957	1.70085	12.1287
ts-70	tRF-1	7.46532	1.77109	7.49364	1.52395	12.166
5P_tRNA-His-GTG-1-9	5‘U-tRF	8.2062	1.84303	8.1633	2.76995	12.3841
ts-14	tRF-1	7.89444	2.06771	7.75448	2.58546	12.2904
ts-44	tRF-1	8.77024	1.62054	8.66058	1.58261	12.8109
ts-49	tRF-1	10.5845	2.40985	10.2539	2.19998	14.9209
tRFdb-1031	tRF-1	8.20761	1.95401	8.27216	1.93118	13.7723
ts-102	tRF-1	6.79517	1.66822	6.79198	2.09661	12.3538
ts-108	tRF-1	6.43539	1.63696	6.30631	1.43464	11.0934
5P_tRNA-Ala-CGC-1-1	5‘U-tRF	8.31325	1.58317	8.24042	2.95472	11.7269
ts-89	tRF-1	8.13468	1.76947	8.03249	2.25062	12.7016
ts-37	tRF-1	7.70453	1.43846	7.64636	1.90655	11.0854
5P_tRNA-His-GTG-1-7	5‘U-tRF	8.51604	1.73627	8.41346	2.76995	12.312
5P_tRNA-Val-CAC-4-1	5‘U-tRF	7.43362	1.74833	7.48289	2.6468	12.4457
ts-51	tRF-1	8.68463	2.00824	8.50115	1.83424	12.9077
tRFdb-5005a	5‘-tRF	8.04626	1.7167	7.9469	2.00045	12.027
tRFdb-5022a	5‘-tRF	8.13779	2.16949	8.4389	3.54865	12.6423
tRFdb-5020b	5‘-tRF	7.94806	1.52255	7.97418	3.00943	11.3736
ts-65	tRF-1	7.74517	1.95572	7.53574	1.88195	11.7264
ts-111	tRF-1	6.79679	1.56579	6.75413	2.32607	10.6147
5P_tRNA-Leu-CAA-1-1	5‘U-tRF	7.31987	1.52529	7.21031	2.51061	10.6126
ts-20	tRF-1	7.09369	1.82169	7.02966	2.32245	11.1588
tRFdb-5008c	5‘-tRF	6.68144	1.75692	6.53951	1.32229	11.5439
5P_tRNA-Val-AAC-2-1	5‘U-tRF	6.79073	1.16115	6.73436	3.42887	10.6295
tRFdb-5021b	5‘-tRF	7.32646	1.72391	7.12107	1.80778	11.3417
tRFdb-1032	tRF-1	8.08909	1.3785	8.06551	3.5624	11.7623
tRFdb-1040	tRF-1	8.22906	1.48225	8.016	3.13111	11.0274
5P_tRNA-Ala-TGC-3-1	5‘U-tRF	7.13702	1.61607	7.13673	2.51061	10.8722
tRFdb-5014a	5‘-tRF	7.24293	1.73434	7.09684	2.55854	13.0346
tRFdb-5019a	5‘-tRF	7.87726	1.70275	7.61925	2.42339	12.1192
tRFdb-5019b	5‘-tRF	7.29536	1.69076	7.04043	1.96699	11.5344
tRFdb-3010a	3‘-tRF	7.79948	1.85841	7.63347	2.28669	11.7928
tRFdb-3010b	3‘-tRF	7.51142	1.85198	7.34691	2.06144	11.5034
ts-67	tRF-1	7.25879	1.9479	7.16912	1.88195	12.2369
5P_tRNA-His-GTG-1-1	5‘U-tRF	7.35193	1.6474	7.20995	2.16718	11.5706
tRFdb-5003b	5‘-tRF	7.38916	1.65938	7.3203	3.04469	11.255
tRFdb-5003c	5‘-tRF	6.89791	1.64964	6.83134	2.61973	10.7605
5P_tRNA-Ala-TGC-3-2	5‘U-tRF	8.81269	1.86504	8.64248	2.16718	13.1651
tRFdb-5017c	5‘-tRF	6.40524	1.70196	6.36688	1.97624	10.7315
tRFdb-5021a	5‘-tRF	7.75784	1.72901	7.53748	2.07574	11.2893
ts-15	tRF-1	6.66761	1.76657	6.72188	2.89037	11.5211
ts-12	tRF-1	7.76414	1.8667	7.71902	2.90931	14.1071
ts-11	tRF-1	6.64534	1.73885	6.53257	2.22291	12.8655
tRFdb-5022b	5‘-tRF	6.68449	1.35252	6.57889	3.03615	10.2505
5P_tRNA-Pro-TGG-2-1	5‘U-tRF	8.36862	1.49677	8.34325	2.43349	11.5542
ts-1	tRF-1	6.89693	1.72816	6.80361	1.8696	10.2443
tRFdb-5029a	5‘-tRF	7.2869	1.92286	7.12204	1.80778	11.5999
tRFdb-5029b	5‘-tRF	6.93583	1.91302	6.77373	1.5643	11.2464
5P_tRNA-Lys-CTT-2-1	5‘U-tRF	7.17014	1.80414	7.15269	1.70085	11.3925
5P_tRNA-Glu-TTC-1-1	5‘U-tRF	7.15475	1.9359	6.98004	1.70085	11.4479
ts-68	tRF-1	7.11799	1.65222	6.86	1.96699	9.89418
ts-60	tRF-1	7.43356	1.66263	7.2153	1.96699	11.8657
tRFdb-5023a	5‘-tRF	7.32329	1.69404	7.0691	1.93118	10.8786
ts-96	tRF-1	6.92264	1.68819	6.79768	2.04698	12.0811
ts-29	tRF-1	6.68657	1.62004	6.71425	2.47932	10.6841
5P_tRNA-Pro-CGG-1-1	5‘U-tRF	6.81107	1.75896	6.70574	2.16718	12.1287
5P_tRNA-Lys-TTT-3-4	5‘U-tRF	7.80463	1.27768	7.76236	3.75723	11.5476
ts-7	tRF-1	6.66323	1.85103	6.58686	1.48581	10.6958
5P_tRNA-His-GTG-1-5	5‘U-tRF	7.70604	1.80764	7.58653	2.16718	12.3462
5P_tRNA-Gly-GCC-2-1	5‘U-tRF	7.5062	1.70375	7.53774	2.27762	11.2511
ts-31	tRF-1	7.79702	2.16673	7.76961	1.96699	15.8046
tRFdb-5007a	5‘-tRF	7.69979	1.69437	7.48666	3.13111	11.1963
tRFdb-5007c	5‘-tRF	6.70671	1.67117	6.50017	2.28705	10.1969
5P_tRNA-Arg-ACG-2-1	5‘U-tRF	6.85966	1.82153	6.75472	2.43349	12.8826
5P_tRNA-Gly-TCC-2-6	5‘U-tRF	7.13454	1.79086	6.93335	1.70085	11.3474
ts-63	tRF-1	6.8853	1.69013	6.81091	1.92339	11.151
ts-18	tRF-1	6.98086	1.93201	6.80816	1.96699	11.0532
ts-30	tRF-1	6.91179	1.63346	6.90621	2.0729	10.3107
5P_tRNA-Val-AAC-3-1	5‘U-tRF	6.70729	1.54134	6.68435	2.95472	10.4812
5P_tRNA-Leu-CAA-4-1	5‘U-tRF	6.92754	1.91897	6.8225	2.27762	11.1344
ts-104	tRF-1	6.57951	1.70111	6.41541	2.0729	10.3119
ts-13	tRF-1	6.40907	1.98456	6.46187	1.96699	12.0168
STDEV: standard deviation
