# Supplementary material for: The tsRNAs (tRFdb-3013a/b) serve as novel biomarkers for colon adenocarcinomas
Source: Aging (Albany NY). 2024 Mar 6;16(5):4299–326. doi: 10.18632/aging.205590 (PMC10968714; doi:10.18632/aging.205590)
Supplement: Supplementary Table 4 [file aging-16-205590-s006.xlsx]

## Sheet: Table S4
Supplementary Table 4. The differentially expressed tsRNA genes between colon adenocarcinomas and non-tumor controls.
tsRNA	logFC	AveExpr	T-test	P.Value	adj.P.Val	B
tRFdb-5002c	5.44597	12.6484	5.38292	8.0861e-08	5.20964e-06	7.61602
tRFdb-5002b	5.41582	13.3278	5.35311	9.51881e-08	5.20964e-06	7.46565
tRFdb-5002a	5.40986	13.7626	5.34723	9.82951e-08	5.20964e-06	7.43605
ts-56	5.45181	12.2116	5.06398	4.43779e-07	1.76402e-05	6.01328
tRFdb-5009a	3.32795	12.4829	4.89825	1.0354e-06	2.37587e-05	5.27786
tRFdb-5009b	3.32727	11.8666	4.89724	1.04068e-06	2.37587e-05	5.27306
tRFdb-5009c	3.32658	11.4363	4.89623	1.04598e-06	2.37587e-05	5.26825
tRFdb-3029b	3.26939	11.4565	4.53685	6.00902e-06	0.000119429	3.64295
tRFdb-3029a	3.08062	12.1482	4.47383	8.0637e-06	0.000142459	3.35043
tRFdb-5024b	2.62841	11.5462	3.72934	0.000196702	0.00312756	0.398052
tRFdb-5024a	2.59399	12.0134	3.68051	0.000238211	0.0032676	0.222592
tRFdb-3008a	2.94681	11.7488	3.65126	0.000266886	0.0032676	0.189369
tRFdb-3008b	2.9466	11.3772	3.65099	0.000267162	0.0032676	0.18843
ts-43	-2.85977	11.8728	-3.32989	0.000882757	0.00998067	-0.856372
tRFdb-5016a	2.25009	11.5539	3.3118	0.000941573	0.00998067	-1.05193
tRFdb-3020a	-2.10571	16.2789	-3.17799	0.00150301	0.0149362	-1.49159
ts-112	2.59233	11.0026	2.92264	0.00350529	0.0309634	-2.05461
tRFdb-5015a	2.07886	11.6584	2.94961	0.0032144	0.0300641	-2.12744
5P_tRNA-Tyr-GTA-5-1	6.38601	9.14706	2.8396	0.00455744	0.0365945	-2.24497
tRFdb-3024b	-1.96378	11.7925	-2.82073	0.00483324	0.0365945	-2.49717
tRFdb-3025b	-1.96378	11.7925	-2.82073	0.00483324	0.0365945	-2.49717
tRFdb-3013a	-1.82888	12.2934	-2.60813	0.00916373	0.0533651	-3.05171
tRFdb-3013b	-1.82882	11.9217	-2.60805	0.00916602	0.0533651	-3.05193
tRFdb-3024a	-1.6686	12.3117	-2.39674	0.0166226	0.10572	-3.57074
tRFdb-3025a	-1.6686	12.3117	-2.39674	0.0166226	0.10572	-3.57074
ts-44	-1.94469	10.3337	-2.19809	0.0280438	0.10187	-3.82465
tRFdb-5010a	2.92742	10.0005	2.29599	0.0217676	0.127148	-3.39416
ts-49	2.29837	11.4346	2.28524	0.0223909	0.127148	-3.55044
tRFdb-5014a	3.13405	8.19816	2.15893	0.0309603	0.136741	-3.6113
tRFdb-3001a	1.53427	13.0335	2.31555	0.0206719	0.126416	-3.79725
tRFdb-3022a	1.98288	10.5863	2.19936	0.0279535	0.13187	-3.80815
tRFdb-3022b	1.98242	10.2971	2.19885	0.0279895	0.13187	-3.80921
ts-7	3.86414	7.24271	1.98404	0.0473725	0.183039	-3.83017
ts-20	3.44106	8.68643	1.97535	0.0483498	0.183039	-3.87325
5P_tRNA-Arg-ACG-2-1	3.76945	7.49011	1.93542	0.0530636	0.196212	-3.90719
tRFdb-3003a	-1.47247	14.333	-2.19608	0.0281873	0.13187	-4.04952
ts-26	-1.4724	13.5315	-2.19598	0.0281948	0.13187	-4.04974
tRFdb-3003b	-1.47236	13.9611	-2.19592	0.0281986	0.13187	-4.04986
tRFdb-5001b	1.99284	9.03226	2.04644	0.0408281	0.166453	-4.05994
tRFdb-3002a	-1.43421	11.0927	-2.16454	0.0305269	0.136741	-4.12648
5P_tRNA-Leu-CAA-1-1	3.29027	8.42176	1.79186	0.0732886	0.234409	-4.14335
5P_tRNA-His-GTG-1-9	-1.77481	9.54533	-2.00607	0.0449675	0.178746	-4.20946
tRFdb-3004a	1.571	13.2393	2.06368	0.0391624	0.163864	-4.21704
5P_tRNA-Ala-CGC-1-1	2.99626	8.57578	1.76249	0.078122	0.238873	-4.21824
ts-9	2.87703	9.88867	1.74785	0.0806255	0.241876	-4.25498
ts-34	2.06904	9.59046	1.88547	0.059494	0.208777	-4.2717
tRFdb-3002b	-1.38347	11.0076	-2.08797	0.0369121	0.158622	-4.28495
ts-110	-2.21557	10.163	-1.82419	0.0682558	0.230908	-4.30775
ts-63	3.05562	6.95833	1.66407	0.0962368	0.255027	-4.32574
ts-68	3.02413	6.99133	1.64692	0.0997134	0.259909	-4.34919
ts-47	-1.63643	10.1296	-1.8788	0.0604008	0.208777	-4.45765
ts-48	2.07555	9.26058	1.66961	0.0951356	0.255027	-4.53885
tRFdb-1024	1.43402	10.7926	1.8961	0.058074	0.208777	-4.54274
tRFdb-1031	2.59884	10.0095	1.49187	0.135873	0.324941	-4.57779
tRFdb-5022a	1.89608	9.17942	1.5082	0.131644	0.322022	-4.76456
tRFdb-1036	1.30205	12.0062	1.78876	0.0737868	0.234409	-4.76673
tRFdb-5020b	1.60653	8.17727	1.59736	0.110326	0.278442	-4.80642
tRFdb-5026c	1.2096	12.7188	1.78036	0.0751519	0.234409	-4.84176
tRFdb-5026b	1.20946	13.1491	1.78014	0.0751877	0.234409	-4.84214
ts-105	-1.21423	12.7533	-1.7316	0.083482	0.245808	-4.89697
tRFdb-3017b	-1.19461	13.0715	-1.70361	0.0885909	0.247122	-4.9436
tRFdb-5001a	1.69569	9.50735	1.32994	0.183672	0.400053	-4.98404
tRFdb-3006a	1.13209	11.4867	1.70857	0.087668	0.247122	-4.98592
tRFdb-3006b	1.13192	11.1149	1.70833	0.0877132	0.247122	-4.98633
tRFdb-5026a	1.13624	13.7769	1.67237	0.0945898	0.255027	-5.02296
ts-95	1.82661	9.88637	1.06344	0.287695	0.551126	-5.04766
ts-75	1.17186	10.7977	1.6145	0.10656	0.273274	-5.0563
tRFdb-5008b	1.37594	8.52158	1.43987	0.150044	0.345753	-5.07394
5P_tRNA-Val-AAC-1-4	-1.73993	7.35953	-0.893365	0.371757	0.659861	-5.09861
tRFdb-3017a	-1.11185	13.3346	-1.58559	0.112971	0.280663	-5.1319
5P_tRNA-His-GTG-1-7	-1.34085	10.5308	-1.22189	0.221878	0.464192	-5.23054
5P_tRNA-Ala-TGC-3-1	1.32626	7.93706	0.722273	0.470201	0.750991	-5.25387
5P_tRNA-Tyr-GTA-2-1	0.844334	6.37622	0.375441	0.707368	0.865165	-5.25475
tRFdb-3009b	1.0632	10.079	1.48787	0.136925	0.324941	-5.26054
ts-74	-1.10696	11.5067	-1.41254	0.15793	0.351729	-5.28326
tRFdb-3014a	1.19006	10.0053	1.30884	0.190721	0.404544	-5.2873
tRFdb-3014b	1.18978	9.71622	1.30854	0.190823	0.404544	-5.28767
ts-108	-1.32235	7.12544	-0.831549	0.405752	0.701245	-5.29236
tRFdb-3007a	1.03662	11.8131	1.47081	0.141481	0.330815	-5.29748
5P_tRNA-Lys-TTT-3-4	1.31616	8.69981	0.906651	0.364688	0.659861	-5.30739
5P_tRNA-Leu-TAA-1-1	1.14364	7.8001	0.622822	0.533465	0.764152	-5.30912
5P_tRNA-Lys-CTT-2-1	1.25384	8.3707	1.16464	0.244287	0.491667	-5.3102
5P_tRNA-Val-AAC-2-1	0.928605	6.57312	0.47679	0.633557	0.813582	-5.3293
ts-70	-1.17045	8.16944	-0.688491	0.491214	0.750991	-5.33305
tRFdb-3009a	1.00831	10.298	1.41106	0.158365	0.351729	-5.36843
tRFdb-5007a	-1.05737	8.38321	-0.6308	0.528235	0.764152	-5.37652
tRFdb-5007c	-1.05291	7.38946	-0.628135	0.529979	0.764152	-5.37795
5P_tRNA-Ser-AGA-2-5	0.590822	7.33625	0.303357	0.761646	0.898506	-5.38399
tRFdb-5013c	-0.987309	9.68281	-1.40798	0.159274	0.351729	-5.38983
5P_tRNA-Lys-TTT-3-2	-0.338182	9.05192	-0.173639	0.862165	0.963436	-5.409
5P_tRNA-Ala-AGC-8-2	0.0972741	7.00722	0.0499452	0.96017	0.986736	-5.42017
ts-81	0.81502	8.70859	0.488668	0.625124	0.813582	-5.44832
ts-42	1.0647	9.03656	1.1467	0.251628	0.500112	-5.45801
ts-97	1.05682	8.75145	0.840625	0.400647	0.700031	-5.47808
ts-80	1.035	9.90908	0.961371	0.336469	0.622076	-5.51169
ts-66	-0.141783	8.4947	-0.083401	0.93354	0.986736	-5.53085
ts-23	0.244697	9.79385	0.145076	0.884664	0.963436	-5.53154
tRFdb-1030	0.249417	9.92046	0.150167	0.880646	0.963436	-5.54395
ts-30	-0.789821	7.27032	-0.573509	0.566357	0.789919	-5.57036
ts-38	0.962828	9.35164	1.03698	0.299855	0.567582	-5.57167
ts-109	0.862727	10.2803	0.693994	0.487758	0.750991	-5.59028
5P_tRNA-His-GTG-1-1	-0.691137	7.61033	-0.501852	0.615821	0.813582	-5.60481
5P_tRNA-Pro-AGG-2-1	-0.22254	9.07272	-0.153299	0.878176	0.963436	-5.66018
tRFdb-5023a	0.212237	7.16306	0.146202	0.883775	0.963436	-5.66112
tRFdb-5022b	0.415539	7.10873	0.301734	0.762883	0.898506	-5.6767
tRFdb-5013b	-0.80909	11.4361	-1.2067	0.227673	0.47013	-5.68684
tRFdb-5012b	-0.795351	11.314	-1.18621	0.235663	0.480391	-5.71068
tRFdb-3010b	0.0903737	7.74752	0.0656226	0.947684	0.986736	-5.71547
tRFdb-3010a	0.089819	8.03532	0.0652198	0.948005	0.986736	-5.71549
5P_tRNA-Pro-TGG-2-1	0.0725698	9.34318	0.0526948	0.95798	0.986736	-5.71615
5P_tRNA-Ala-TGC-3-2	0.0461912	9.91084	0.0335406	0.973246	0.986736	-5.71689
tRFdb-5019b	0.0117697	7.57025	0.00854629	0.993182	0.993806	-5.71736
tRFdb-5019a	0.0106916	8.15182	0.00776345	0.993806	0.993806	-5.71737
tRFdb-3021a	0.748603	10.837	0.722748	0.46991	0.750991	-5.73395
tRFdb-3033a	0.783619	11.0064	1.12557	0.260466	0.511284	-5.74363
tRFdb-3007b	0.738726	9.74866	0.719667	0.471805	0.750991	-5.7442
tRFdb-5004b	0.374902	8.72637	0.294037	0.768756	0.898767	-5.7476
5P_tRNA-Val-CAC-1-1	-0.434991	9.16767	-0.358149	0.720265	0.874215	-5.77241
tRFdb-5012a	-0.751707	11.78	-1.072	0.283837	0.550366	-5.79402
5P_tRNA-Gly-TCC-2-6	0.539456	7.78841	0.479748	0.631453	0.813582	-5.79549
tRFdb-5008c	0.534656	7.45819	0.475479	0.634491	0.813582	-5.79738
ts-50	0.746169	11.8406	0.980175	0.327105	0.611878	-5.8084
ts-1	-0.642011	8.73883	-0.64412	0.519563	0.764152	-5.8195
ts-65	0.551197	8.09559	0.511987	0.60871	0.813582	-5.82038
ts-53	-0.502481	13.3206	-0.457901	0.647068	0.82307	-5.82729
tRFdb-5004c	0.478503	8.20463	0.43605	0.662842	0.829857	-5.83638
tRFdb-5005a	0.629626	8.77304	0.669254	0.503402	0.762294	-5.85716
5P_tRNA-Val-CAC-4-1	-0.603042	8.04694	-0.647639	0.517284	0.764152	-5.88021
tRFdb-3005a	-0.638492	10.7066	-0.770673	0.440981	0.745915	-5.90582
tRFdb-3004b	-0.623536	10.3014	-0.75262	0.451757	0.748222	-5.919
tRFdb-3005b	-0.623536	10.3014	-0.75262	0.451757	0.748222	-5.919
tRFdb-3030b	-0.651404	13.8953	-0.894903	0.370934	0.659861	-5.9277
tRFdb-3030a	-0.647909	14.1872	-0.890101	0.373506	0.659861	-5.93185
tRFdb-3021b	0.0435986	9.6877	0.0416489	0.966782	0.986736	-5.96798
ts-37	0.195349	9.08592	0.20287	0.839255	0.963436	-6.02791
tRFdb-3023a	0.511351	10.7388	0.694648	0.487347	0.750991	-6.07105
tRFdb-5032a	-0.220051	11.5405	-0.242731	0.808236	0.938026	-6.07653
tRFdb-3023b	0.473426	10.3419	0.643128	0.520206	0.764152	-6.10438
5P_tRNA-Lys-TTT-3-1	-0.521963	9.41008	-0.787758	0.430921	0.736736	-6.10455
tRFdb-3026a	-0.492825	9.80583	-0.702809	0.482247	0.750991	-6.11187
tRFdb-3026b	-0.492698	9.51682	-0.702627	0.48236	0.750991	-6.112
tRFdb-3027a	-0.31631	9.81208	-0.38433	0.70077	0.863845	-6.12607
tRFdb-3027b	-0.316216	9.44064	-0.384215	0.700855	0.863845	-6.12611
tRFdb-5027b	0.357665	9.26236	0.446302	0.655422	0.82708	-6.12674
tRFdb-5027c	0.0605592	8.66398	0.0735819	0.94135	0.986736	-6.19433
tRFdb-3015a	0.353135	12.6813	0.485139	0.627625	0.813582	-6.20138
tRFdb-3015b	0.353108	12.4699	0.485102	0.627651	0.813582	-6.2014
tRFdb-3016a	0.403374	11.6536	0.601604	0.547498	0.770442	-6.21899
tRFdb-3016b	0.403325	11.4422	0.601531	0.547546	0.770442	-6.21903
ts-6	0.250449	9.63114	0.33115	0.740562	0.89204	-6.22535
tRFdb-3011a	0.147524	9.49842	0.187965	0.850921	0.963436	-6.22555
tRFdb-3011b	0.147512	9.20943	0.187949	0.850934	0.963436	-6.22556
tRFdb-5011a	-0.229992	12.2552	-0.314774	0.752962	0.898506	-6.26369
tRFdb-3012a	-0.341653	15.0004	-0.51563	0.606163	0.813582	-6.27716
tRFdb-3012b	-0.337877	14.7197	-0.509932	0.610149	0.813582	-6.28
tRFdb-5020a	-0.086919	11.6132	-0.11896	0.905318	0.974073	-6.30479
ts-36	0.0235194	14.1627	0.0321894	0.974324	0.986736	-6.31114
tRFdb-5005c	-0.102363	9.55812	-0.154488	0.877239	0.963436	-6.39493
tRFdb-5005b	-0.0776791	9.85907	-0.117235	0.906684	0.974073	-6.39986
