# Supplementary material for: The tsRNAs (tRFdb-3013a/b) serve as novel biomarkers for colon adenocarcinomas
Source: Aging (Albany NY). 2024 Mar 6;16(5):4299–326. doi: 10.18632/aging.205590 (PMC10968714; doi:10.18632/aging.205590)
Supplement: Supplementary Table 5 [file aging-16-205590-s007.xlsx]

## Sheet: Table S5
Supplementary Table 5. The expression profiles of tRNA-His-GUG derived tsRNA fragments in the samples of TCGA-COAD datasets.
sample	patient	ts-1	ts-88	ts-30	ts-43	ts-44	tRFdb-3013a	tRFdb-3013b
TCGA-4N-A93T-01A	TCGA-4N-A93T	NA	NA	4.86808	NA	NA	5.3511	4.98949
TCGA-4T-AA8H-01A	TCGA-4T-AA8H	6.24372	NA	7.50554	NA	NA	8.5838	8.21294
TCGA-5M-AAT4-01A	TCGA-5M-AAT4	NA	NA	6.53366	NA	NA	7.02661	6.65789
TCGA-5M-AAT6-01A	TCGA-5M-AAT6	NA	NA	8.51203	NA	NA	9.00838	8.63723
TCGA-5M-AATA-01A	TCGA-5M-AATA	4.66481	4.48622	NA	NA	NA	6.39455	6.02762
TCGA-A6-2671-01A	TCGA-A6-2671	NA	NA	NA	11.4053	10.4464	13.0724	12.7004
TCGA-A6-2671-11A	TCGA-A6-2671	10.1553	NA	NA	14.0121	12.205	15.6064	15.2345
TCGA-A6-2672-01B	TCGA-A6-2672	NA	6.20481	NA	NA	NA	7.15223	6.78324
TCGA-A6-2672-01B	TCGA-A6-2672	NA	6.16129	NA	6.03759	NA	7.10841	6.73952
TCGA-A6-2674-01A	TCGA-A6-2674	NA	NA	NA	13.0712	9.20721	14.5686	14.1966
TCGA-A6-2675-01A	TCGA-A6-2675	NA	NA	NA	11.4551	9.17578	12.8476	12.4757
TCGA-A6-2677-01A	TCGA-A6-2677	NA	NA	NA	11.2045	NA	12.2867	11.9148
TCGA-A6-2678-01A	TCGA-A6-2678	NA	NA	NA	10.4529	9.49453	12.7045	12.3326
TCGA-A6-2679-01A	TCGA-A6-2679	NA	6.38763	NA	NA	NA	7.33618	6.96683
TCGA-A6-2679-01A	TCGA-A6-2679	NA	8.55743	NA	11.5985	8.47277	12.9701	12.5982
TCGA-A6-2680-01A	TCGA-A6-2680	NA	NA	8.0059	NA	NA	8.50176	8.13096
TCGA-A6-2680-01A	TCGA-A6-2680	NA	NA	NA	10.3466	8.80442	11.4285	11.0567
TCGA-A6-2680-11A	TCGA-A6-2680	6.00219	NA	7.00079	NA	NA	8.17007	7.79958
TCGA-A6-2680-11A	TCGA-A6-2680	9.50725	NA	NA	NA	NA	10.2769	9.90532
TCGA-A6-2681-01A	TCGA-A6-2681	NA	NA	NA	10.2574	NA	11.3392	10.9674
TCGA-A6-2682-01A	TCGA-A6-2682	NA	NA	NA	11.3105	NA	12.878	12.5061
TCGA-A6-2683-01A	TCGA-A6-2683	7.25876	6.08432	5.55338	4.9837	NA	9.02261	8.65145
TCGA-A6-2683-01A	TCGA-A6-2683	7.70113	5.53913	5.99008	12.1105	10.9472	14.1158	13.7439
TCGA-A6-2683-11A	TCGA-A6-2683	NA	NA	8.59294	14.3262	11.8526	15.6866	15.3147
TCGA-A6-2684-01A	TCGA-A6-2684	NA	NA	NA	11.4612	9.91783	13.0458	12.6739
TCGA-A6-2684-11A	TCGA-A6-2684	9.33496	NA	NA	14.8537	12.6466	16.2665	15.8945
TCGA-A6-2685-01A	TCGA-A6-2685	NA	NA	NA	11.5729	8.52949	12.8155	12.4436
TCGA-A6-2685-11A	TCGA-A6-2685	NA	NA	NA	14.8898	12.8109	16.322	15.95
TCGA-A6-2686-01A	TCGA-A6-2686	NA	NA	NA	12.8869	10.469	14.2103	13.8384
TCGA-A6-3807-01A	TCGA-A6-3807	7.76284	NA	7.0402	10.2528	9.80841	12.3343	11.9624
TCGA-A6-3808-01A	TCGA-A6-3808	NA	NA	9.72923	10.3661	8.60196	12.2253	11.8534
TCGA-A6-3809-01A	TCGA-A6-3809	NA	NA	NA	8.92456	NA	10.0055	9.6339
TCGA-A6-3810-01A	TCGA-A6-3810	7.30164	NA	NA	NA	7.03223	9.06568	8.6945
TCGA-A6-3810-01A	TCGA-A6-3810	7.63858	NA	NA	8.90735	7.36877	10.4029	10.0312
TCGA-A6-4105-01A	TCGA-A6-4105	NA	NA	NA	11.0526	8.51153	12.5496	12.1777
TCGA-A6-4107-01A	TCGA-A6-4107	NA	NA	7.24317	NA	NA	7.73789	7.36791
TCGA-A6-4107-01A	TCGA-A6-4107	NA	NA	NA	11.2125	NA	12.7097	12.3377
TCGA-A6-5656-01A	TCGA-A6-5656	1.8696	NA	2.0729	NA	NA	3.32997	2.9996
TCGA-A6-5656-01A	TCGA-A6-5656	5.8071	NA	6.07567	10.5994	8.51375	12.0755	11.7036
TCGA-A6-5656-01A	TCGA-A6-5656	3.51697	NA	NA	NA	NA	4.23437	3.88477
TCGA-A6-5656-01B	TCGA-A6-5656	7.89302	NA	7.17001	NA	NA	9.2448	8.87353
TCGA-A6-5657-01A	TCGA-A6-5657	NA	NA	7.56173	12.6132	10.8179	14.074	13.7021
TCGA-A6-5659-01A	TCGA-A6-5659	NA	NA	NA	12.1744	8.13245	13.4172	13.0453
TCGA-A6-5660-01A	TCGA-A6-5660	NA	NA	NA	12.7821	11.823	14.4925	14.1205
TCGA-A6-5661-01A	TCGA-A6-5661	NA	NA	6.42024	NA	NA	6.91282	6.54437
TCGA-A6-5661-01A	TCGA-A6-5661	NA	NA	NA	10.9961	10.3002	13.0291	12.6572
TCGA-A6-5661-01B	TCGA-A6-5661	6.60147	6.4171	NA	NA	NA	8.36145	7.99077
TCGA-A6-5661-01B	TCGA-A6-5661	6.28002	7.08559	NA	9.85784	7.00134	11.2804	10.9086
TCGA-A6-5662-01A	TCGA-A6-5662	NA	NA	NA	13.7961	11.4772	15.1195	14.7475
TCGA-A6-5664-01A	TCGA-A6-5664	NA	NA	NA	NA	NA	6.85694	6.48863
TCGA-A6-5664-01A	TCGA-A6-5664	NA	NA	NA	11.9505	7.78787	13.1087	12.7368
TCGA-A6-5665-01A	TCGA-A6-5665	4.32845	NA	NA	NA	NA	5.06894	4.70956
TCGA-A6-5665-01A	TCGA-A6-5665	7.25277	NA	NA	9.51826	7.97771	11.4737	11.1019
TCGA-A6-5665-01B	TCGA-A6-5665	NA	7.57299	NA	NA	NA	8.52625	8.15543
TCGA-A6-5666-01A	TCGA-A6-5666	NA	NA	8.74212	10.4767	10.5173	13.0438	12.6719
TCGA-A6-5667-01A	TCGA-A6-5667	NA	5.24918	NA	5.12709	NA	6.1876	5.82144
TCGA-A6-5667-01A	TCGA-A6-5667	NA	6.86037	7.31641	13.2144	10.2236	14.5053	14.1334
TCGA-A6-6137-01A	TCGA-A6-6137	2.21086	2.0668	3.82344	NA	2.00263	5.25358	4.89269
TCGA-A6-6137-01A	TCGA-A6-6137	NA	5.09034	NA	10.5952	7.55512	11.8376	11.4657
TCGA-A6-6138-01A	TCGA-A6-6138	NA	NA	NA	10.0072	7.41108	11.3991	11.0273
TCGA-A6-6140-01A	TCGA-A6-6140	NA	NA	NA	10.3194	NA	11.6077	11.2358
TCGA-A6-6141-01A	TCGA-A6-6141	NA	NA	3.91749	NA	NA	4.38687	4.03505
TCGA-A6-6141-01A	TCGA-A6-6141	NA	NA	NA	11.205	8.28616	12.5866	12.2147
TCGA-A6-6142-01A	TCGA-A6-6142	NA	NA	NA	12.7472	10.2309	14.124	13.7521
TCGA-A6-6648-01A	TCGA-A6-6648	NA	NA	NA	12.3124	9.35494	13.5102	13.1382
TCGA-A6-6649-01A	TCGA-A6-6649	NA	NA	NA	12.1683	9.7014	13.4841	13.1122
TCGA-A6-6650-01A	TCGA-A6-6650	4.90956	NA	NA	NA	3.1739	5.08931	4.72975
TCGA-A6-6650-01A	TCGA-A6-6650	7.34391	NA	NA	9.89904	8.06908	11.3791	11.0073
TCGA-A6-6650-01B	TCGA-A6-6650	8.69047	NA	NA	NA	NA	8.87561	8.50454
TCGA-A6-6651-01A	TCGA-A6-6651	NA	8.38239	8.84064	NA	NA	10.3361	9.96447
TCGA-A6-6651-01A	TCGA-A6-6651	NA	NA	NA	12.0227	9.3045	13.3035	12.9316
TCGA-A6-6652-01A	TCGA-A6-6652	NA	NA	4.63957	NA	NA	5.12009	4.76027
TCGA-A6-6652-01A	TCGA-A6-6652	NA	NA	NA	10.5977	8.43992	12.014	11.6421
TCGA-A6-6653-01A	TCGA-A6-6653	NA	NA	NA	11.1704	9.5243	12.6799	12.308
TCGA-A6-6654-01A	TCGA-A6-6654	NA	NA	NA	7.24821	NA	8.32565	7.95501
TCGA-A6-6654-01A	TCGA-A6-6654	NA	NA	NA	10.7538	8.43522	12.1894	11.8175
TCGA-A6-6780-01A	TCGA-A6-6780	NA	NA	NA	9.15757	NA	10.2387	9.86709
TCGA-A6-6780-01B	TCGA-A6-6780	NA	5.00702	NA	NA	NA	5.94204	5.57695
TCGA-A6-6781-01A	TCGA-A6-6781	NA	NA	NA	11.6841	11.14	13.5736	13.2017
TCGA-A6-6781-01A	TCGA-A6-6781	8.21437	NA	NA	NA	NA	8.98288	8.61175
TCGA-A6-6781-01B	TCGA-A6-6781	NA	7.62945	NA	NA	NA	8.58284	8.21198
TCGA-A6-6782-01A	TCGA-A6-6782	NA	NA	5.67837	NA	NA	6.16762	5.80155
TCGA-A6-6782-01A	TCGA-A6-6782	NA	NA	NA	10.9527	8.33409	12.2625	11.8906
TCGA-A6-A565-01A	TCGA-A6-A565	NA	6.9477	NA	NA	NA	7.89895	7.52876
TCGA-A6-A566-01A	TCGA-A6-A566	5.36091	6.15929	NA	NA	NA	7.68787	7.31795
TCGA-A6-A56B-01A	TCGA-A6-A56B	NA	6.91737	NA	NA	NA	7.8685	7.49835
TCGA-A6-A5ZU-01A	TCGA-A6-A5ZU	7.00561	NA	NA	NA	NA	7.77147	7.40145
TCGA-AA-3488-01A	TCGA-AA-3488	NA	NA	NA	NA	NA	7.00522	6.63655
TCGA-AA-3488-01A	TCGA-AA-3488	NA	NA	NA	9.59005	7.05475	10.8938	10.522
TCGA-AA-3489-01A	TCGA-AA-3489	NA	NA	7.50494	NA	NA	8.00013	7.62981
TCGA-AA-3489-01A	TCGA-AA-3489	NA	NA	NA	12.5319	10.288	13.9435	13.5716
TCGA-AA-3492-01A	TCGA-AA-3492	8.28666	NA	NA	10.9708	NA	12.3748	12.0029
TCGA-AA-3494-01A	TCGA-AA-3494	6.14216	NA	6.41165	NA	NA	7.89816	7.52797
TCGA-AA-3494-01A	TCGA-AA-3494	NA	NA	NA	10.5786	8.81416	11.8532	11.4813
TCGA-AA-3495-01A	TCGA-AA-3495	NA	NA	7.15338	NA	NA	7.64792	7.27807
TCGA-AA-3495-01A	TCGA-AA-3495	NA	NA	NA	11.4492	NA	12.7944	12.4225
TCGA-AA-3496-01A	TCGA-AA-3496	NA	NA	NA	10.4344	8.55186	11.5903	11.2185
TCGA-AA-3502-01A	TCGA-AA-3502	NA	NA	NA	10.7372	9.19453	12.0416	11.6697
TCGA-AA-3506-01A	TCGA-AA-3506	NA	NA	8.07115	NA	NA	8.56709	8.19624
TCGA-AA-3506-01A	TCGA-AA-3506	NA	NA	NA	10.1676	7.62928	11.4717	11.0998
TCGA-AA-3509-01A	TCGA-AA-3509	NA	NA	NA	10.0352	NA	10.7952	10.4235
TCGA-AA-3510-01A	TCGA-AA-3510	NA	NA	NA	10.7634	9.22066	12.2604	11.8885
TCGA-AA-3511-01A	TCGA-AA-3511	NA	NA	5.78317	NA	NA	6.27301	5.90651
TCGA-AA-3511-01A	TCGA-AA-3511	NA	NA	NA	10.9418	9.52427	12.4951	12.1232
TCGA-AA-3514-01A	TCGA-AA-3514	NA	NA	NA	11.752	10.0281	13.2703	12.8983
TCGA-AA-3516-01A	TCGA-AA-3516	NA	NA	8.11434	NA	NA	8.61032	8.23944
TCGA-AA-3516-01A	TCGA-AA-3516	NA	NA	NA	12.3152	11.4816	14.0673	13.6953
TCGA-AA-3517-01A	TCGA-AA-3517	NA	NA	NA	10.1636	9.20541	11.9821	11.6102
TCGA-AA-3518-01A	TCGA-AA-3518	NA	NA	9.52256	NA	NA	10.0195	9.64793
TCGA-AA-3518-01A	TCGA-AA-3518	NA	NA	NA	12.8897	11.3457	14.709	14.337
TCGA-AA-3519-01A	TCGA-AA-3519	NA	7.01421	NA	6.8897	NA	7.96572	7.59545
TCGA-AA-3519-01A	TCGA-AA-3519	NA	NA	NA	8.72148	8.17872	10.2168	9.84515
TCGA-AA-3520-01A	TCGA-AA-3520	NA	8.02091	8.47883	NA	NA	9.97372	9.60217
TCGA-AA-3520-01A	TCGA-AA-3520	NA	NA	NA	11.9945	9.22986	13.4393	13.0674
TCGA-AA-3520-11A	TCGA-AA-3520	10.2443	NA	NA	7.93703	7.97751	11.0143	10.6425
TCGA-AA-3521-01A	TCGA-AA-3521	NA	NA	NA	11.7666	9.48688	13.5268	13.1549
TCGA-AA-3522-01A	TCGA-AA-3522	NA	NA	9.11852	NA	NA	9.61526	9.24384
TCGA-AA-3522-01A	TCGA-AA-3522	NA	NA	NA	10.2943	8.33827	11.9609	11.5891
TCGA-AA-3524-01A	TCGA-AA-3524	NA	NA	NA	9.51955	8.97613	11.3376	10.9658
TCGA-AA-3525-01A	TCGA-AA-3525	8.34873	NA	NA	NA	NA	9.11741	8.74621
TCGA-AA-3525-01A	TCGA-AA-3525	10.0125	NA	NA	NA	NA	10.7824	10.4107
TCGA-AA-3525-11A	TCGA-AA-3525	9.74068	NA	NA	NA	NA	10.5105	10.1388
TCGA-AA-3526-01A	TCGA-AA-3526	8.06539	NA	NA	NA	NA	8.83367	8.46263
TCGA-AA-3527-01A	TCGA-AA-3527	NA	NA	NA	11.3026	8.17774	12.7997	12.4278
TCGA-AA-3527-11A	TCGA-AA-3527	7.8213	NA	NA	15.0226	10.7923	16.1928	15.8208
TCGA-AA-3529-01A	TCGA-AA-3529	8.8378	NA	NA	9.52466	9.56524	12.7753	12.4034
TCGA-AA-3531-01A	TCGA-AA-3531	NA	NA	NA	10.0442	NA	11.5409	11.169
TCGA-AA-3532-01A	TCGA-AA-3532	NA	NA	NA	12.2107	9.516	13.6149	13.2429
TCGA-AA-3534-01A	TCGA-AA-3534	NA	NA	NA	11.9444	9.98608	13.6116	13.2396
TCGA-AA-3538-01A	TCGA-AA-3538	NA	NA	8.32945	NA	NA	8.82564	8.45461
TCGA-AA-3538-01A	TCGA-AA-3538	NA	NA	NA	12.4986	10.9548	14.259	13.887
TCGA-AA-3542-01A	TCGA-AA-3542	NA	NA	NA	11.0635	8.30066	12.5861	12.2142
TCGA-AA-3543-01A	TCGA-AA-3543	NA	NA	NA	11.0782	9.53519	12.5753	12.2034
TCGA-AA-3544-01A	TCGA-AA-3544	NA	NA	NA	10.878	10.9186	12.9599	12.5879
TCGA-AA-3548-01A	TCGA-AA-3548	NA	NA	NA	8.97077	10.5944	12.3726	12.0007
TCGA-AA-3549-01A	TCGA-AA-3549	NA	NA	NA	11.1611	10.7868	12.828	12.4561
TCGA-AA-3552-01A	TCGA-AA-3552	NA	NA	NA	10.8497	8.89255	12.2536	11.8817
TCGA-AA-3553-01A	TCGA-AA-3553	NA	NA	NA	12.4878	10.1145	14.0295	13.6576
TCGA-AA-3555-01A	TCGA-AA-3555	NA	NA	NA	10.723	NA	11.805	11.4331
TCGA-AA-3556-01A	TCGA-AA-3556	8.73573	8.54978	10.0068	NA	NA	11.3108	10.939
TCGA-AA-3556-01A	TCGA-AA-3556	7.71407	NA	NA	11.2032	9.75947	12.7258	12.3539
TCGA-AA-3558-01A	TCGA-AA-3558	NA	NA	NA	10.6151	10.0712	13.1118	12.7399
TCGA-AA-3560-01A	TCGA-AA-3560	NA	NA	NA	11.2635	NA	12.6087	12.2368
TCGA-AA-3561-01A	TCGA-AA-3561	8.75335	NA	NA	NA	NA	9.52248	9.15109
TCGA-AA-3561-01A	TCGA-AA-3561	9.52486	NA	NA	NA	NA	10.2946	9.92294
TCGA-AA-3562-01A	TCGA-AA-3562	NA	NA	NA	10.3231	8.95049	11.9898	11.6179
TCGA-AA-3655-01A	TCGA-AA-3655	8.35125	NA	NA	NA	NA	8.12253	7.75209
TCGA-AA-3655-01A	TCGA-AA-3655	9.14538	NA	NA	11.4164	9.87306	13.001	12.6291
TCGA-AA-3660-01A	TCGA-AA-3660	NA	NA	NA	10.9446	6.4772	12.088	11.7162
TCGA-AA-3662-01A	TCGA-AA-3662	5.28624	NA	6.53742	NA	NA	7.61166	7.24186
TCGA-AA-3662-01A	TCGA-AA-3662	7.53674	NA	NA	12.0753	9.26	13.344	12.9721
TCGA-AA-3663-01A	TCGA-AA-3663	NA	NA	6.15265	NA	NA	6.64423	6.27649
TCGA-AA-3663-01A	TCGA-AA-3663	NA	NA	NA	11.6231	10.9271	13.8427	13.4708
TCGA-AA-3664-01A	TCGA-AA-3664	9.31064	NA	NA	12.9035	10.6229	14.1664	13.7945
TCGA-AA-3666-01A	TCGA-AA-3666	NA	NA	NA	10.1432	8.60134	11.8098	11.4379
TCGA-AA-3667-01A	TCGA-AA-3667	7.13181	NA	NA	9.9809	7.85642	11.6998	11.328
TCGA-AA-3672-01A	TCGA-AA-3672	NA	NA	NA	10.8558	8.31528	12.1602	11.7884
TCGA-AA-3673-01A	TCGA-AA-3673	7.51482	NA	7.78648	11.4809	8.56136	12.8012	12.4293
TCGA-AA-3675-01A	TCGA-AA-3675	8.87262	NA	NA	NA	NA	9.64186	9.27042
TCGA-AA-3678-01A	TCGA-AA-3678	NA	NA	7.5099	NA	NA	8.00509	7.63477
TCGA-AA-3678-01A	TCGA-AA-3678	NA	NA	7.32665	9.43519	7.36704	11.2081	10.8363
TCGA-AA-3679-01A	TCGA-AA-3679	NA	6.47153	NA	NA	NA	7.42056	7.05107
TCGA-AA-3679-01A	TCGA-AA-3679	NA	6.12616	6.57994	10.229	8.34683	11.7631	11.3913
TCGA-AA-3680-01A	TCGA-AA-3680	NA	NA	8.80724	NA	NA	9.3038	8.9325
TCGA-AA-3680-01A	TCGA-AA-3680	NA	NA	NA	10.9164	8.37567	11.9985	11.6266
TCGA-AA-3681-01A	TCGA-AA-3681	9.35881	NA	9.63145	NA	NA	11.1278	10.756
TCGA-AA-3681-01A	TCGA-AA-3681	8.44775	NA	NA	10.7175	11.2604	13.0969	12.725
TCGA-AA-3684-01A	TCGA-AA-3684	NA	NA	NA	11.0937	NA	11.9535	11.5816
TCGA-AA-3685-01A	TCGA-AA-3685	6.30544	6.12154	6.57531	NA	NA	8.64617	8.27526
TCGA-AA-3685-01A	TCGA-AA-3685	6.45714	NA	NA	8.45473	7.17932	10.6715	10.2998
TCGA-AA-3688-01A	TCGA-AA-3688	6.46498	NA	NA	NA	NA	7.22873	6.85959
TCGA-AA-3688-01A	TCGA-AA-3688	8.09924	NA	NA	8.7853	8.82585	11.187	10.8152
TCGA-AA-3692-01A	TCGA-AA-3692	7.52696	NA	NA	NA	NA	8.29424	7.92362
TCGA-AA-3692-01A	TCGA-AA-3692	7.77788	NA	NA	10.4604	8.50397	12.449	12.0771
TCGA-AA-3693-01A	TCGA-AA-3693	NA	NA	NA	10.7605	6.12077	11.9494	11.5776
TCGA-AA-3695-01A	TCGA-AA-3695	NA	NA	NA	10.2813	7.86758	11.6041	11.2323
TCGA-AA-3696-01A	TCGA-AA-3696	NA	NA	8.54655	NA	NA	9.04293	8.67176
TCGA-AA-3696-01A	TCGA-AA-3696	NA	NA	NA	10.872	8.33141	12.5389	12.167
TCGA-AA-3697-01A	TCGA-AA-3697	NA	NA	NA	9.32364	NA	10.4049	10.0333
TCGA-AA-3710-01A	TCGA-AA-3710	NA	NA	NA	8.29408	7.75187	9.78861	9.41712
TCGA-AA-3712-01A	TCGA-AA-3712	NA	NA	NA	10.0904	8.7545	11.6414	11.2696
TCGA-AA-3713-01A	TCGA-AA-3713	6.27234	NA	6.54214	NA	6.00489	7.03511	6.66638
TCGA-AA-3713-01A	TCGA-AA-3713	8.26751	NA	NA	12.4106	10.3146	13.8408	13.4689
TCGA-AA-3715-01A	TCGA-AA-3715	NA	NA	NA	10.8915	9.93291	12.7808	12.4089
TCGA-AA-3811-01A	TCGA-AA-3811	7.20197	NA	NA	NA	NA	7.96842	7.59815
TCGA-AA-3811-01A	TCGA-AA-3811	6.66608	NA	NA	10.9256	9.9669	12.7801	12.4082
TCGA-AA-3812-01A	TCGA-AA-3812	NA	NA	6.46718	9.45284	NA	10.7565	10.3847
TCGA-AA-3814-01A	TCGA-AA-3814	NA	8.21794	NA	NA	NA	9.17252	8.80129
TCGA-AA-3814-01A	TCGA-AA-3814	NA	6.42287	NA	9.09043	6.339	10.6857	10.314
TCGA-AA-3815-01A	TCGA-AA-3815	NA	NA	7.46438	7.87737	NA	9.54059	9.16919
TCGA-AA-3818-01A	TCGA-AA-3818	6.95655	6.77174	7.22756	NA	NA	9.30265	8.93135
TCGA-AA-3818-01A	TCGA-AA-3818	6.25543	NA	NA	9.09704	6.97662	10.5928	10.2211
TCGA-AA-3819-01A	TCGA-AA-3819	NA	NA	NA	9.66462	6.71726	10.916	10.5442
TCGA-AA-3821-01A	TCGA-AA-3821	5.40197	NA	NA	NA	NA	6.1583	5.79226
TCGA-AA-3821-01A	TCGA-AA-3821	5.61694	NA	NA	8.60095	6.33394	10.2658	9.8942
TCGA-AA-3833-01A	TCGA-AA-3833	NA	NA	7.70883	10.5773	9.48155	12.3696	11.9977
TCGA-AA-3837-01A	TCGA-AA-3837	7.65255	NA	NA	NA	NA	8.4201	8.04937
TCGA-AA-3837-01A	TCGA-AA-3837	7.61056	NA	7.8823	10.0999	9.33409	12.2809	11.909
TCGA-AA-3842-01A	TCGA-AA-3842	6.42756	NA	NA	NA	NA	7.19112	6.82206
TCGA-AA-3842-01A	TCGA-AA-3842	5.98811	NA	7.24775	8.65684	5.72151	10.1964	9.82478
TCGA-AA-3844-01A	TCGA-AA-3844	6.52961	NA	NA	NA	NA	7.29365	6.92438
TCGA-AA-3844-01A	TCGA-AA-3844	6.60403	NA	NA	8.28183	NA	10.1683	9.79665
TCGA-AA-3845-01A	TCGA-AA-3845	5.94853	5.76533	NA	NA	NA	6.70935	6.34143
TCGA-AA-3845-01A	TCGA-AA-3845	7.66611	NA	6.94378	6.36466	NA	9.01726	8.64611
TCGA-AA-3846-01A	TCGA-AA-3846	NA	5.14776	5.59605	NA	NA	7.07416	6.70533
TCGA-AA-3846-01A	TCGA-AA-3846	NA	6.23563	NA	NA	6.1519	8.17828	7.80777
TCGA-AA-3848-01A	TCGA-AA-3848	8.21151	NA	NA	NA	NA	8.98001	8.60888
TCGA-AA-3848-01A	TCGA-AA-3848	8.65278	NA	NA	9.9237	NA	11.4202	11.0484
TCGA-AA-3850-01A	TCGA-AA-3850	NA	NA	7.65432	8.06757	NA	9.73131	9.35984
TCGA-AA-3851-01A	TCGA-AA-3851	NA	NA	6.44943	NA	NA	6.94211	6.57359
TCGA-AA-3851-01A	TCGA-AA-3851	NA	NA	NA	7.38664	6.11763	8.9488	8.57769
TCGA-AA-3852-01A	TCGA-AA-3852	NA	NA	NA	10.4895	7.08045	11.697	11.3251
TCGA-AA-3854-01A	TCGA-AA-3854	7.60217	NA	8.87083	NA	NA	9.95166	9.58012
TCGA-AA-3854-01A	TCGA-AA-3854	8.62065	NA	NA	NA	NA	9.38965	9.01832
TCGA-AA-3855-01A	TCGA-AA-3855	NA	NA	7.18021	10.1715	8.21573	11.6682	11.2963
TCGA-AA-3856-01A	TCGA-AA-3856	NA	NA	NA	6.56676	6.60698	8.63755	8.26665
TCGA-AA-3858-01A	TCGA-AA-3858	NA	8.59046	NA	NA	NA	9.54557	9.17417
TCGA-AA-3858-01A	TCGA-AA-3858	NA	NA	NA	10.1341	NA	11.6308	11.259
TCGA-AA-3860-01A	TCGA-AA-3860	NA	NA	NA	8.51654	9.14076	10.9177	10.546
TCGA-AA-3861-01A	TCGA-AA-3861	6.9937	5.82166	9.25771	5.69844	NA	10.2135	9.84189
TCGA-AA-3861-01A	TCGA-AA-3861	6.75663	5.58714	6.03836	8.43545	6.48808	10.3222	9.95058
TCGA-AA-3862-01A	TCGA-AA-3862	6.1404	NA	NA	NA	NA	6.90243	6.534
TCGA-AA-3862-01A	TCGA-AA-3862	5.70371	NA	4.99475	9.27304	7.73318	10.8394	10.4676
TCGA-AA-3864-01A	TCGA-AA-3864	NA	NA	NA	9.69341	9.5416	11.7745	11.4027
TCGA-AA-3866-01A	TCGA-AA-3866	6.59502	NA	NA	7.85927	6.32681	10.3516	9.98
TCGA-AA-3867-01A	TCGA-AA-3867	6.55578	NA	8.40261	NA	NA	9.31315	8.94185
TCGA-AA-3867-01A	TCGA-AA-3867	NA	NA	NA	11.1423	8.24844	12.5082	12.1363
TCGA-AA-3869-01A	TCGA-AA-3869	NA	NA	NA	8.66248	6.13526	10.1577	9.78608
TCGA-AA-3870-01A	TCGA-AA-3870	NA	NA	5.99223	NA	NA	6.48311	6.11588
TCGA-AA-3870-01A	TCGA-AA-3870	5.75626	NA	6.02467	6.43416	6.47434	8.82495	8.45392
TCGA-AA-3872-01A	TCGA-AA-3872	NA	7.78074	NA	NA	NA	8.73449	8.36352
TCGA-AA-3872-01A	TCGA-AA-3872	NA	6.00975	NA	9.95057	7.90831	11.5296	11.1577
TCGA-AA-3875-01A	TCGA-AA-3875	NA	6.15733	6.61124	NA	NA	8.09918	7.72876
TCGA-AA-3875-01A	TCGA-AA-3875	NA	6.98413	NA	8.85029	6.89993	10.5156	10.1439
TCGA-AA-3877-01A	TCGA-AA-3877	6.62893	NA	6.89943	6.3205	NA	8.97263	8.60151
TCGA-AA-3877-01A	TCGA-AA-3877	7.54162	NA	9.22432	10.282	9.48695	12.3635	11.9916
TCGA-AA-3930-01A	TCGA-AA-3930	7.07052	NA	7.34168	NA	NA	8.83343	8.46239
TCGA-AA-3930-01A	TCGA-AA-3930	NA	7.21805	NA	10.9415	NA	11.9205	11.5487
TCGA-AA-3939-01A	TCGA-AA-3939	NA	NA	NA	7.72907	NA	8.80794	8.43692
TCGA-AA-3939-01A	TCGA-AA-3939	NA	NA	NA	7.98612	NA	8.48196	8.11118
TCGA-AA-3941-01A	TCGA-AA-3941	NA	NA	7.93949	NA	8.39358	10.7539	10.3821
TCGA-AA-3947-01A	TCGA-AA-3947	NA	7.84477	NA	10.0363	7.76026	11.6032	11.2314
TCGA-AA-3949-01A	TCGA-AA-3949	NA	NA	NA	9.50251	NA	10.5839	10.2122
TCGA-AA-3950-01A	TCGA-AA-3950	6.70304	NA	7.5548	10.1334	7.42624	11.5894	11.2176
TCGA-AA-3952-01A	TCGA-AA-3952	NA	6.3641	NA	NA	NA	7.31252	6.94322
TCGA-AA-3952-01A	TCGA-AA-3952	NA	4.93684	NA	8.22768	6.81692	10.0172	9.64564
TCGA-AA-3955-01A	TCGA-AA-3955	8.1016	NA	6.79742	9.90138	7.24959	11.5303	11.1585
TCGA-AA-3956-01A	TCGA-AA-3956	7.88873	NA	NA	NA	NA	8.65673	8.28581
TCGA-AA-3956-01A	TCGA-AA-3956	8.07586	NA	8.34796	12.0068	NA	13.2335	12.8616
TCGA-AA-3966-01A	TCGA-AA-3966	10.1342	NA	NA	NA	NA	10.9042	10.5324
TCGA-AA-3966-01A	TCGA-AA-3966	7.5765	NA	NA	11.065	10.4686	13.04	12.6681
TCGA-AA-3968-01A	TCGA-AA-3968	NA	NA	7.10277	NA	NA	7.59721	7.22743
TCGA-AA-3968-01A	TCGA-AA-3968	NA	5.35572	NA	9.71979	6.25418	11.2318	10.86
TCGA-AA-3970-01A	TCGA-AA-3970	NA	NA	NA	8.11349	NA	9.77734	9.40585
TCGA-AA-3971-01A	TCGA-AA-3971	NA	NA	NA	10.4401	6.79235	11.6289	11.2571
TCGA-AA-3972-01A	TCGA-AA-3972	NA	5.53288	NA	NA	NA	6.47462	6.10742
TCGA-AA-3972-01A	TCGA-AA-3972	NA	7.25797	NA	10.4459	8.75194	11.9063	11.5344
TCGA-AA-3973-01A	TCGA-AA-3973	NA	NA	NA	NA	NA	7.69982	7.32989
TCGA-AA-3973-01A	TCGA-AA-3973	NA	NA	NA	10.8053	8.34711	12.7066	12.3347
TCGA-AA-3975-01A	TCGA-AA-3975	NA	NA	NA	8.89344	6.48778	10.4214	10.0497
TCGA-AA-3976-01A	TCGA-AA-3976	7.37108	NA	NA	NA	NA	8.13799	7.76753
TCGA-AA-3976-01A	TCGA-AA-3976	8.76231	NA	NA	9.4491	7.49569	11.1151	10.7433
TCGA-AA-3977-01A	TCGA-AA-3977	NA	NA	NA	8.89626	NA	10.3918	10.0202
TCGA-AA-3979-01A	TCGA-AA-3979	5.20888	NA	7.7709	NA	NA	8.52873	8.15791
TCGA-AA-3979-01A	TCGA-AA-3979	7.43117	NA	6.70965	9.86727	7.16159	11.62	11.2482
TCGA-AA-3980-01A	TCGA-AA-3980	5.21217	NA	4.51047	NA	NA	6.95492	6.58636
TCGA-AA-3980-01A	TCGA-AA-3980	5.61966	NA	NA	7.45624	6.65503	9.75452	9.38305
TCGA-AA-3982-01A	TCGA-AA-3982	NA	NA	NA	11.3775	8.25242	12.6117	12.2398
TCGA-AA-3984-01A	TCGA-AA-3984	8.88677	NA	NA	NA	NA	8.65782	8.2869
TCGA-AA-3984-01A	TCGA-AA-3984	7.20626	NA	NA	8.34838	7.25655	10.3604	9.98875
TCGA-AA-3986-01A	TCGA-AA-3986	5.48504	NA	5.7525	NA	5.22039	7.81437	7.44428
TCGA-AA-3986-01A	TCGA-AA-3986	5.61645	NA	NA	10.2302	7.90643	11.7839	11.4121
TCGA-AA-3989-01A	TCGA-AA-3989	6.24294	NA	8.30869	NA	NA	9.16672	8.79549
TCGA-AA-3989-01A	TCGA-AA-3989	6.2622	NA	5.54748	10.7901	8.78261	12.2429	11.871
TCGA-AA-3994-01A	TCGA-AA-3994	NA	NA	NA	9.98866	7.23016	11.5847	11.2129
TCGA-AA-A00D-01A	TCGA-AA-A00D	NA	NA	NA	12.4103	9.75194	13.8796	13.5077
TCGA-AA-A00J-01A	TCGA-AA-A00J	NA	NA	NA	11.0452	10.0865	12.5422	12.1703
TCGA-AA-A00L-01A	TCGA-AA-A00L	NA	NA	NA	13.0737	9.07251	14.241	13.8691
TCGA-AA-A00O-01A	TCGA-AA-A00O	NA	9.87511	NA	NA	NA	10.8313	10.4596
TCGA-AA-A00O-01A	TCGA-AA-A00O	NA	7.98595	NA	12.3144	8.89838	13.5812	13.2092
TCGA-AA-A00Q-01A	TCGA-AA-A00Q	NA	NA	NA	12.0506	10.9761	13.7543	13.3824
TCGA-AA-A00U-01A	TCGA-AA-A00U	9.42204	NA	NA	NA	NA	10.1917	9.82008
TCGA-AA-A00U-01A	TCGA-AA-A00U	7.52715	NA	7.79881	11.8516	8.83612	13.1969	12.8249
TCGA-AA-A00W-01A	TCGA-AA-A00W	NA	NA	7.45041	NA	6.90986	7.9455	7.57525
TCGA-AA-A00W-01A	TCGA-AA-A00W	NA	NA	NA	10.9646	9.00729	12.4389	12.067
TCGA-AA-A010-01A	TCGA-AA-A010	NA	NA	NA	6.07997	NA	7.15113	6.78214
TCGA-AA-A010-01A	TCGA-AA-A010	NA	NA	NA	12.0776	8.00805	13.2408	12.8689
TCGA-AA-A01D-01A	TCGA-AA-A01D	NA	NA	NA	12.5056	10.4096	14.0354	13.6634
TCGA-AA-A01F-01A	TCGA-AA-A01F	NA	NA	7.0382	NA	NA	7.53249	7.16281
TCGA-AA-A01F-01A	TCGA-AA-A01F	NA	NA	NA	10.3327	8.50172	11.955	11.5831
TCGA-AA-A01G-01A	TCGA-AA-A01G	7.33206	NA	8.59982	NA	NA	9.09623	8.72504
TCGA-AA-A01G-01A	TCGA-AA-A01G	7.61708	NA	NA	11.3858	9.34064	12.5504	12.1785
TCGA-AA-A01P-01A	TCGA-AA-A01P	NA	NA	NA	10.9558	8.75109	12.4903	12.1184
TCGA-AA-A01R-01A	TCGA-AA-A01R	NA	NA	NA	10.9622	9.58896	12.5036	12.1317
TCGA-AA-A01S-01A	TCGA-AA-A01S	NA	NA	9.53908	NA	NA	10.036	9.66445
TCGA-AA-A01S-01A	TCGA-AA-A01S	NA	NA	9.23531	11.4558	NA	12.8181	12.4462
TCGA-AA-A01T-01A	TCGA-AA-A01T	NA	NA	NA	10.6111	NA	11.6931	11.3213
TCGA-AA-A01V-01A	TCGA-AA-A01V	NA	NA	NA	12.0715	NA	13.1538	12.7819
TCGA-AA-A01X-01A	TCGA-AA-A01X	NA	NA	NA	11.4072	9.12796	12.9044	12.5324
TCGA-AA-A01Z-01A	TCGA-AA-A01Z	NA	NA	8.25619	NA	NA	9.01479	8.64364
TCGA-AA-A01Z-01A	TCGA-AA-A01Z	NA	NA	6.14847	6.55841	5.61344	9.21288	8.84163
TCGA-AA-A022-01A	TCGA-AA-A022	7.7215	NA	10.3107	NA	NA	11.0708	10.699
TCGA-AA-A022-01A	TCGA-AA-A022	7.50838	NA	NA	11.4369	7.23871	12.6635	12.2916
TCGA-AA-A024-01A	TCGA-AA-A024	NA	NA	9.29008	NA	NA	9.78691	9.41542
TCGA-AA-A024-01A	TCGA-AA-A024	NA	NA	NA	12.2436	10.6999	13.6479	13.2759
TCGA-AA-A029-01A	TCGA-AA-A029	NA	NA	NA	11.4176	NA	12.4998	12.1279
TCGA-AA-A02E-01A	TCGA-AA-A02E	7.8056	NA	NA	NA	NA	8.57345	8.20259
TCGA-AA-A02E-01A	TCGA-AA-A02E	8.43288	NA	NA	11.0243	8.16244	12.5214	12.1495
TCGA-AA-A02F-01A	TCGA-AA-A02F	NA	NA	9.78235	NA	NA	10.2794	9.90774
TCGA-AA-A02F-01A	TCGA-AA-A02F	NA	NA	NA	11.3708	9.09164	13.3009	12.929
TCGA-AA-A02H-01A	TCGA-AA-A02H	NA	NA	NA	10.4205	7.01191	11.6279	11.2561
TCGA-AA-A02K-01A	TCGA-AA-A02K	6.48547	NA	8.33174	NA	NA	9.24218	8.87091
TCGA-AA-A02K-01A	TCGA-AA-A02K	6.90455	NA	NA	11.581	NA	12.9111	12.5392
TCGA-AA-A02O-01A	TCGA-AA-A02O	NA	NA	NA	11.2194	10.0384	12.9535	12.5816
TCGA-AA-A02R-01A	TCGA-AA-A02R	NA	NA	NA	11.5398	9.7743	13.1366	12.7646
TCGA-AA-A02Y-01A	TCGA-AA-A02Y	NA	NA	8.23094	NA	NA	8.72704	8.35607
TCGA-AA-A02Y-01A	TCGA-AA-A02Y	NA	8.45811	NA	11.6508	8.37347	12.9961	12.6242
TCGA-AA-A03F-01A	TCGA-AA-A03F	10.1582	NA	10.1093	NA	NA	11.7758	11.404
TCGA-AA-A03F-01A	TCGA-AA-A03F	9.78812	NA	NA	12.6123	9.51715	13.9901	13.6181
TCGA-AA-A03J-01A	TCGA-AA-A03J	7.40942	NA	6.68799	NA	NA	8.75972	8.38873
TCGA-AA-A03J-01A	TCGA-AA-A03J	8.35633	NA	NA	11.4328	8.66913	12.8775	12.5056
TCGA-AD-5900-01A	TCGA-AD-5900	5.68804	NA	NA	NA	NA	5.46338	5.10099
TCGA-AD-5900-01A	TCGA-AD-5900	7.24794	6.07359	NA	11.5708	9.29135	12.9864	12.6145
TCGA-AD-6548-01A	TCGA-AD-6548	3.29462	NA	4.47877	NA	NA	5.52668	5.16388
TCGA-AD-6548-01A	TCGA-AD-6548	6.19822	NA	NA	10.1157	8.71792	11.7043	11.3324
TCGA-AD-6888-01A	TCGA-AD-6888	4.27286	NA	6.07576	NA	NA	6.56701	6.19951
TCGA-AD-6888-01A	TCGA-AD-6888	5.83802	NA	NA	9.50262	5.57192	10.7539	10.3821
TCGA-AD-6889-01A	TCGA-AD-6889	NA	NA	8.70926	NA	NA	9.20575	8.8345
TCGA-AD-6889-01A	TCGA-AD-6889	NA	NA	9.54642	NA	NA	10.0434	9.67179
TCGA-AD-6890-01A	TCGA-AD-6890	NA	NA	7.52161	NA	NA	8.01682	7.64648
TCGA-AD-6890-01A	TCGA-AD-6890	NA	NA	NA	11.0803	8.62146	12.2449	11.873
TCGA-AD-6895-01A	TCGA-AD-6895	7.03128	NA	9.10321	6.722	NA	9.9621	9.59056
TCGA-AD-6895-01A	TCGA-AD-6895	8.23568	NA	NA	11.0351	9.69828	12.7021	12.3302
TCGA-AD-6899-01A	TCGA-AD-6899	NA	6.70617	NA	10.153	8.93228	11.7371	11.3653
TCGA-AD-6901-01A	TCGA-AD-6901	NA	NA	6.56744	NA	NA	7.0605	6.69171
TCGA-AD-6901-01A	TCGA-AD-6901	NA	NA	NA	11.9627	10.8338	13.6476	13.2756
TCGA-AD-6963-01A	TCGA-AD-6963	6.97498	NA	7.24602	11.4069	9.69391	12.9821	12.6102
TCGA-AD-6964-01A	TCGA-AD-6964	6.02975	4.87124	NA	NA	NA	7.37171	7.0023
TCGA-AD-6964-01A	TCGA-AD-6964	8.70999	7.52796	NA	10.9803	9.02298	12.7992	12.4273
TCGA-AD-6965-01A	TCGA-AD-6965	7.88325	NA	NA	NA	NA	8.65124	8.28033
TCGA-AD-6965-01A	TCGA-AD-6965	9.11047	NA	NA	12.0442	9.42362	13.5224	13.1504
TCGA-AM-5820-01A	TCGA-AM-5820	NA	NA	NA	11.6028	10.007	13.1255	12.7536
TCGA-AM-5821-01A	TCGA-AM-5821	9.07702	NA	NA	NA	NA	6.05931	5.69369
TCGA-AM-5821-01A	TCGA-AM-5821	9.59887	NA	NA	8.87311	5.04806	10.2167	9.84512
TCGA-AU-3779-01A	TCGA-AU-3779	NA	NA	5.63593	NA	NA	6.12494	5.75904
TCGA-AU-3779-01A	TCGA-AU-3779	NA	NA	NA	10.2834	8.61032	11.7484	11.3766
TCGA-AU-6004-01A	TCGA-AU-6004	NA	6.89286	NA	NA	NA	7.84389	7.47377
TCGA-AU-6004-01A	TCGA-AU-6004	NA	NA	NA	12.8182	9.33735	13.962	13.5901
TCGA-AY-4070-01A	TCGA-AY-4070	NA	NA	NA	12.1192	11.3121	14.0315	13.6595
TCGA-AY-4071-01A	TCGA-AY-4071	NA	NA	NA	11.2093	9.51429	12.7767	12.4048
TCGA-AY-5543-01A	TCGA-AY-5543	3.40537	NA	NA	NA	NA	4.11842	3.77068
TCGA-AY-5543-01A	TCGA-AY-5543	6.88359	NA	NA	10.1456	6.61481	11.4497	11.0779
TCGA-AY-6196-01A	TCGA-AY-6196	6.79418	5.62426	8.38041	NA	NA	9.36119	8.98987
TCGA-AY-6196-01A	TCGA-AY-6196	7.27148	6.09693	6.55061	13.1402	10.4513	14.5084	14.1365
TCGA-AY-6197-01A	TCGA-AY-6197	NA	NA	NA	9.39334	NA	10.3816	10.01
TCGA-AY-6386-01A	TCGA-AY-6386	6.20382	NA	NA	NA	NA	6.96621	6.59763
TCGA-AY-6386-01A	TCGA-AY-6386	6.58949	NA	NA	9.43449	7.31223	10.9306	10.5589
TCGA-AY-A69D-01A	TCGA-AY-A69D	5.86025	NA	6.12898	NA	NA	7.6131	7.2433
TCGA-AZ-4308-01A	TCGA-AZ-4308	NA	NA	NA	11.0036	8.72505	12.5711	12.1992
TCGA-AZ-4313-01A	TCGA-AZ-4313	NA	NA	NA	9.68324	8.72554	10.7648	10.393
TCGA-AZ-4315-01A	TCGA-AZ-4315	NA	NA	NA	10.1724	NA	11.7395	11.3677
TCGA-AZ-4323-01A	TCGA-AZ-4323	3.42331	NA	NA	NA	NA	4.13708	3.78903
TCGA-AZ-4323-01A	TCGA-AZ-4323	6.71717	NA	NA	11.9464	9.43418	13.3069	12.935
TCGA-AZ-4614-01A	TCGA-AZ-4614	NA	5.26926	5.71846	NA	NA	7.19815	6.82907
TCGA-AZ-4614-01A	TCGA-AZ-4614	NA	NA	NA	10.0017	9.04372	12.1986	11.8267
TCGA-AZ-4615-01A	TCGA-AZ-4615	NA	NA	NA	NA	NA	6.57754	6.21001
TCGA-AZ-4615-01A	TCGA-AZ-4615	NA	NA	NA	11.5705	10.0271	13.3156	12.9437
TCGA-AZ-4616-01A	TCGA-AZ-4616	NA	NA	NA	10.1954	7.39545	11.5991	11.2272
TCGA-AZ-4681-01A	TCGA-AZ-4681	NA	NA	NA	NA	7.28647	9.32128	8.94997
TCGA-AZ-4682-01B	TCGA-AZ-4682	NA	NA	NA	10.986	9.02865	12.6529	12.281
TCGA-AZ-4684-01A	TCGA-AZ-4684	7.13167	NA	NA	NA	NA	8.8949	8.52382
TCGA-AZ-4684-01A	TCGA-AZ-4684	6.88932	NA	NA	9.73677	7.61318	11.6481	11.2762
TCGA-AZ-5403-01A	TCGA-AZ-5403	NA	NA	NA	11.6012	9.19903	12.9266	12.5547
TCGA-AZ-5407-01A	TCGA-AZ-5407	NA	NA	NA	11.9684	9.01148	13.0507	12.6788
TCGA-AZ-6598-01A	TCGA-AZ-6598	2.6411	2.48624	NA	NA	NA	4.2381	3.88845
TCGA-AZ-6598-01A	TCGA-AZ-6598	6.61577	NA	NA	9.19839	8.14215	11.0161	10.6443
TCGA-AZ-6599-01A	TCGA-AZ-6599	2.86033	NA	NA	NA	NA	3.54621	3.21011
TCGA-AZ-6599-01A	TCGA-AZ-6599	6.15209	NA	NA	9.90868	8.86346	11.71	11.3381
TCGA-AZ-6600-01A	TCGA-AZ-6600	NA	4.16103	NA	8.54135	6.59314	9.94333	9.57179
TCGA-AZ-6601-01A	TCGA-AZ-6601	4.95372	NA	6.19919	NA	NA	7.27125	6.90203
TCGA-AZ-6601-01A	TCGA-AZ-6601	7.36012	NA	NA	11.4322	9.88889	13.122	12.7501
TCGA-AZ-6603-01A	TCGA-AZ-6603	5.45768	NA	NA	5.15364	NA	6.21455	5.84829
TCGA-AZ-6603-01A	TCGA-AZ-6603	6.60539	NA	NA	12.5267	9.12913	13.683	13.3111
TCGA-AZ-6605-01A	TCGA-AZ-6605	NA	NA	NA	11.389	8.71008	12.7121	12.3402
TCGA-AZ-6606-01A	TCGA-AZ-6606	NA	NA	3.91718	NA	NA	4.38656	4.03474
TCGA-AZ-6606-01A	TCGA-AZ-6606	NA	NA	NA	10.7557	7.95336	12.094	11.7221
TCGA-AZ-6607-01A	TCGA-AZ-6607	NA	NA	7.15745	NA	NA	7.652	7.28214
TCGA-AZ-6607-01A	TCGA-AZ-6607	NA	NA	NA	12.2939	9.39783	13.5806	13.2087
TCGA-AZ-6608-01A	TCGA-AZ-6608	NA	NA	5.48299	NA	NA	5.97105	5.60583
TCGA-AZ-6608-01A	TCGA-AZ-6608	NA	NA	6.16055	11.0154	8.76916	12.1926	11.8208
TCGA-CA-5254-01A	TCGA-CA-5254	NA	NA	NA	11.9761	9.14447	13.2428	12.8709
TCGA-CA-5255-01A	TCGA-CA-5255	NA	NA	NA	10.3236	7.49661	11.6463	11.2745
TCGA-CA-5256-01A	TCGA-CA-5256	NA	NA	NA	11.9202	NA	13.1951	12.8232
TCGA-CA-5796-01A	TCGA-CA-5796	NA	NA	NA	11.9042	9.13964	13.2665	12.8946
TCGA-CA-5797-01A	TCGA-CA-5797	NA	NA	NA	11.2274	8.05046	12.4563	12.0844
TCGA-CA-6716-01A	TCGA-CA-6716	NA	NA	NA	12.3606	9.86643	13.8703	13.4983
TCGA-CA-6717-01A	TCGA-CA-6717	NA	NA	NA	10.7769	7.30237	12.1933	11.8214
TCGA-CA-6718-01A	TCGA-CA-6718	6.94142	NA	NA	NA	NA	7.70707	7.33713
TCGA-CA-6718-01A	TCGA-CA-6718	7.42099	NA	NA	11.8559	9.46521	13.3329	12.961
TCGA-CA-6719-01A	TCGA-CA-6719	NA	4.08669	NA	NA	NA	5.97917	5.61391
TCGA-CA-6719-01A	TCGA-CA-6719	NA	5.87766	NA	12.1706	8.77133	13.4824	13.1105
TCGA-CK-4947-01B	TCGA-CK-4947	NA	NA	NA	12.3596	9.35777	13.607	13.235
TCGA-CK-4948-01B	TCGA-CK-4948	NA	NA	NA	NA	NA	5.56191	5.19889
TCGA-CK-4948-01B	TCGA-CK-4948	NA	NA	NA	10.4742	7.52171	11.726	11.3542
TCGA-CK-4950-01A	TCGA-CK-4950	3.96788	NA	5.18581	3.67802	NA	6.2472	5.8808
TCGA-CK-4950-01A	TCGA-CK-4950	6.00724	NA	6.27639	9.9221	6.72702	11.0777	10.706
TCGA-CK-4951-01A	TCGA-CK-4951	NA	NA	8.77287	NA	NA	9.2694	8.89812
TCGA-CK-4951-01A	TCGA-CK-4951	8.65921	NA	NA	10.3448	10.7071	12.8858	12.5139
TCGA-CK-4952-01A	TCGA-CK-4952	NA	NA	NA	12.0371	9.90894	13.8562	13.4843
TCGA-CK-5912-01A	TCGA-CK-5912	6.64538	NA	6.91591	NA	NA	8.40567	8.03496
TCGA-CK-5912-01A	TCGA-CK-5912	6.27906	NA	6.54887	12.2525	9.79804	13.6748	13.3029
TCGA-CK-5913-01A	TCGA-CK-5913	NA	NA	6.85715	NA	NA	7.35102	6.98164
TCGA-CK-5913-01A	TCGA-CK-5913	NA	NA	NA	10.8236	8.86658	12.2979	11.926
TCGA-CK-5914-01A	TCGA-CK-5914	NA	NA	NA	9.77049	7.81589	11.3113	10.9395
TCGA-CK-5915-01A	TCGA-CK-5915	NA	NA	NA	9.18919	8.06284	10.5596	10.188
TCGA-CK-5916-01A	TCGA-CK-5916	NA	NA	NA	12.6796	9.91421	14.1245	13.7526
TCGA-CK-6746-01A	TCGA-CK-6746	NA	NA	NA	11.8562	10.6343	13.4409	13.069
TCGA-CK-6747-01A	TCGA-CK-6747	NA	NA	6.66978	NA	NA	7.16314	6.79413
TCGA-CK-6747-01A	TCGA-CK-6747	NA	NA	NA	11.0606	9.74859	12.5259	12.154
TCGA-CK-6748-01A	TCGA-CK-6748	NA	NA	NA	11.1971	8.51856	12.6271	12.2552
TCGA-CK-6751-01A	TCGA-CK-6751	3.77119	NA	6.75525	NA	NA	7.44031	7.07078
TCGA-CK-6751-01A	TCGA-CK-6751	5.72164	NA	NA	10.0839	7.01887	11.2201	10.8483
TCGA-CM-4743-01A	TCGA-CM-4743	NA	NA	NA	11.7463	7.79302	12.9984	12.6265
TCGA-CM-4744-01A	TCGA-CM-4744	NA	NA	5.42153	NA	NA	5.90918	5.54426
TCGA-CM-4744-01A	TCGA-CM-4744	NA	NA	NA	9.08413	9.1247	11.1646	10.7928
TCGA-CM-4746-01A	TCGA-CM-4746	NA	5.14218	NA	NA	NA	6.07917	5.71346
TCGA-CM-4747-01A	TCGA-CM-4747	NA	8.85066	NA	NA	NA	9.80608	9.43458
TCGA-CM-4747-01A	TCGA-CM-4747	NA	8.09424	NA	11.2859	9.59089	13.046	12.6741
TCGA-CM-4748-01A	TCGA-CM-4748	NA	NA	NA	10.7527	NA	12.1241	11.7523
TCGA-CM-4750-01A	TCGA-CM-4750	NA	NA	NA	10.5651	8.90736	12.2684	11.8965
TCGA-CM-4751-01A	TCGA-CM-4751	NA	NA	NA	8.30483	4.49926	9.5652	9.19379
TCGA-CM-4752-01A	TCGA-CM-4752	NA	NA	NA	11.0221	7.37033	12.2111	11.8392
TCGA-CM-5341-01A	TCGA-CM-5341	NA	NA	NA	11.5937	10.6348	13.3539	12.982
TCGA-CM-5344-01A	TCGA-CM-5344	NA	NA	NA	12.0833	10.3592	13.5376	13.1656
TCGA-CM-5348-01A	TCGA-CM-5348	NA	NA	NA	12.8963	9.53271	14.1334	13.7614
TCGA-CM-5349-01A	TCGA-CM-5349	NA	NA	NA	12.4734	10.4753	13.8381	13.4662
TCGA-CM-5860-01A	TCGA-CM-5860	NA	5.39203	NA	NA	NA	6.3322	5.96549
TCGA-CM-5860-01A	TCGA-CM-5860	NA	7.15172	NA	11.3741	9.86555	13.0055	12.6336
TCGA-CM-5861-01A	TCGA-CM-5861	NA	NA	NA	10.5739	6.3831	11.8673	11.4955
TCGA-CM-5862-01A	TCGA-CM-5862	NA	5.55632	NA	NA	NA	6.49831	6.13103
TCGA-CM-5862-01A	TCGA-CM-5862	NA	7.11208	NA	10.8513	8.43594	12.4046	12.0327
TCGA-CM-5863-01A	TCGA-CM-5863	NA	6.34061	NA	NA	NA	7.28888	6.91962
TCGA-CM-5863-01A	TCGA-CM-5863	NA	8.6916	NA	11.9553	NA	13.1688	12.7968
TCGA-CM-5864-01A	TCGA-CM-5864	NA	NA	NA	4.89519	NA	5.95183	6.57161
TCGA-CM-5864-01A	TCGA-CM-5864	NA	NA	NA	10.6792	8.81527	12.1021	11.8042
TCGA-CM-5868-01A	TCGA-CM-5868	NA	NA	NA	13.518	10.752	14.793	14.4211
TCGA-CM-6161-01A	TCGA-CM-6161	NA	NA	NA	11.6674	7.51905	12.7496	12.3777
TCGA-CM-6162-01A	TCGA-CM-6162	NA	NA	NA	12.4381	9.79205	13.7709	13.399
TCGA-CM-6163-01A	TCGA-CM-6163	NA	NA	NA	11.4501	9.17076	12.7249	12.353
TCGA-CM-6164-01A	TCGA-CM-6164	NA	NA	NA	12.0839	9.49393	13.4214	13.0495
TCGA-CM-6165-01A	TCGA-CM-6165	NA	NA	NA	11.2418	9.16889	12.6679	12.296
TCGA-CM-6166-01A	TCGA-CM-6166	NA	NA	NA	11.3819	8.20448	12.701	12.3291
TCGA-CM-6167-01A	TCGA-CM-6167	NA	NA	NA	13.3232	10.4459	14.6365	14.2645
TCGA-CM-6168-01A	TCGA-CM-6168	NA	NA	7.28534	NA	NA	7.78014	7.4101
TCGA-CM-6168-01A	TCGA-CM-6168	NA	NA	NA	12.2598	9.42782	13.5266	13.1546
TCGA-CM-6169-01A	TCGA-CM-6169	NA	NA	4.85638	NA	NA	5.33928	4.97776
TCGA-CM-6169-01A	TCGA-CM-6169	NA	NA	NA	10.9776	8.04893	12.2782	11.9063
TCGA-CM-6170-01A	TCGA-CM-6170	8.02104	NA	NA	14.1955	11.3297	15.5003	15.1283
TCGA-CM-6171-01A	TCGA-CM-6171	7.06641	NA	NA	10.6514	NA	11.914	11.5421
TCGA-CM-6172-01A	TCGA-CM-6172	NA	NA	NA	10.9273	7.51562	12.0093	11.6375
TCGA-CM-6674-01A	TCGA-CM-6674	8.06047	7.8748	NA	NA	NA	9.82716	9.45566
TCGA-CM-6674-01A	TCGA-CM-6674	6.44968	6.26554	NA	11.3696	8.97201	12.8185	12.4466
TCGA-CM-6675-01A	TCGA-CM-6675	NA	NA	NA	12.0925	10.5488	13.6342	13.2623
TCGA-CM-6676-01A	TCGA-CM-6676	NA	NA	5.51911	NA	2.83834	6.0074	5.64201
TCGA-CM-6676-01A	TCGA-CM-6676	NA	NA	5.8933	9.50824	7.20876	10.8906	10.5189
TCGA-CM-6677-01A	TCGA-CM-6677	2.70073	2.5446	NA	NA	NA	4.30518	3.95451
TCGA-CM-6677-01A	TCGA-CM-6677	4.79857	NA	NA	9.86165	7.65159	11.2448	10.873
TCGA-CM-6678-01A	TCGA-CM-6678	NA	NA	2.62962	NA	NA	3.05747	2.73559
TCGA-CM-6678-01A	TCGA-CM-6678	NA	NA	NA	8.95163	5.69554	10.2954	9.92373
TCGA-CM-6679-01A	TCGA-CM-6679	NA	NA	NA	12.2321	9.71959	13.5147	13.1428
TCGA-CM-6680-01A	TCGA-CM-6680	NA	NA	NA	10.7829	7.65992	12.0734	11.7016
TCGA-D5-5537-01A	TCGA-D5-5537	NA	NA	6.42179	NA	NA	6.91437	6.54592
TCGA-D5-5537-01A	TCGA-D5-5537	NA	NA	NA	12.161	10.7167	13.7934	13.4215
TCGA-D5-5538-01A	TCGA-D5-5538	NA	NA	NA	11.9181	9.56795	13.3629	12.991
TCGA-D5-5539-01A	TCGA-D5-5539	4.88565	NA	5.15022	NA	NA	5.63583	5.27237
TCGA-D5-5539-01A	TCGA-D5-5539	7.04473	NA	7.31586	11.0444	9.93386	12.7114	12.3395
TCGA-D5-5540-01A	TCGA-D5-5540	NA	NA	NA	12.2869	7.94082	13.6773	13.3054
TCGA-D5-5541-01A	TCGA-D5-5541	NA	9.26513	NA	14.2248	11.1785	15.5052	15.1332
TCGA-D5-6529-01A	TCGA-D5-6529	NA	NA	NA	11.7383	9.57099	13.1657	12.7937
TCGA-D5-6530-01A	TCGA-D5-6530	NA	3.96858	NA	NA	NA	4.88013	4.52249
TCGA-D5-6530-01A	TCGA-D5-6530	NA	6.96435	NA	11.9569	9.45488	13.4017	13.0297
TCGA-D5-6531-01A	TCGA-D5-6531	NA	7.74899	NA	12.0765	9.98074	13.4542	13.0823
TCGA-D5-6532-01A	TCGA-D5-6532	4.21401	NA	NA	NA	NA	4.952	4.59367
TCGA-D5-6532-01A	TCGA-D5-6532	7.66714	NA	NA	11.3486	7.39731	12.8902	12.5183
TCGA-D5-6533-01A	TCGA-D5-6533	NA	NA	4.49609	NA	NA	4.97482	4.61628
TCGA-D5-6533-01A	TCGA-D5-6533	NA	NA	6.26967	10.6668	8.51783	12.0706	11.6987
TCGA-D5-6534-01A	TCGA-D5-6534	NA	NA	NA	13.7589	10.4145	15.0182	14.6463
TCGA-D5-6535-01A	TCGA-D5-6535	NA	NA	NA	12.6942	NA	13.7026	13.3306
TCGA-D5-6536-01A	TCGA-D5-6536	7.41434	NA	NA	13.1602	9.72123	14.3859	14.0139
TCGA-D5-6537-01A	TCGA-D5-6537	NA	NA	NA	10.4501	7.04123	11.6575	11.2856
TCGA-D5-6538-01A	TCGA-D5-6538	NA	NA	NA	NA	5.83312	6.86186	6.49354
TCGA-D5-6538-01A	TCGA-D5-6538	NA	NA	NA	12.9392	10.0424	14.1984	13.8265
TCGA-D5-6539-01A	TCGA-D5-6539	NA	NA	NA	9.80359	8.43177	11.6922	11.3204
TCGA-D5-6540-01A	TCGA-D5-6540	6.85642	NA	NA	4.99304	NA	6.05139	5.68581
TCGA-D5-6540-01A	TCGA-D5-6540	8.92959	NA	NA	11.2782	9.07305	12.6974	12.3255
TCGA-D5-6541-01A	TCGA-D5-6541	NA	NA	NA	11.654	9.45923	13.2154	12.8434
TCGA-D5-6898-01A	TCGA-D5-6898	NA	6.52474	NA	9.84446	8.42829	11.5539	11.182
TCGA-D5-6920-01A	TCGA-D5-6920	NA	NA	6.82793	NA	NA	7.32173	6.95241
TCGA-D5-6920-01A	TCGA-D5-6920	NA	NA	NA	10.6356	NA	11.3957	11.0239
TCGA-D5-6922-01A	TCGA-D5-6922	NA	7.41179	NA	NA	NA	8.36461	7.99393
TCGA-D5-6922-01A	TCGA-D5-6922	NA	7.38911	NA	10.7152	8.88361	12.3377	11.9658
TCGA-D5-6923-01A	TCGA-D5-6923	NA	NA	7.99778	NA	NA	8.49363	8.12284
TCGA-D5-6923-01A	TCGA-D5-6923	NA	NA	NA	12.2613	9.531	13.6007	13.2288
TCGA-D5-6924-01A	TCGA-D5-6924	NA	NA	NA	11.8175	10.3563	13.3972	13.0253
TCGA-D5-6926-01A	TCGA-D5-6926	NA	NA	NA	12.3455	11.3864	14.1502	13.7783
TCGA-D5-6927-01A	TCGA-D5-6927	7.10831	NA	NA	NA	NA	7.87449	7.50433
TCGA-D5-6927-01A	TCGA-D5-6927	7.83446	NA	8.10639	13.7451	12.5113	15.4316	15.0596
TCGA-D5-6928-01A	TCGA-D5-6928	NA	NA	NA	10.8825	8.1202	12.327	11.9551
TCGA-D5-6929-01A	TCGA-D5-6929	NA	NA	NA	10.3791	7.42711	11.7829	11.411
TCGA-D5-6930-01A	TCGA-D5-6930	NA	NA	NA	11.0464	8.97371	12.7498	12.3779
TCGA-D5-6931-01A	TCGA-D5-6931	NA	NA	NA	7.9044	8.94194	10.5667	10.195
TCGA-D5-6932-01A	TCGA-D5-6932	NA	5.45989	NA	NA	NA	6.40084	6.03388
TCGA-D5-6932-01A	TCGA-D5-6932	NA	6.47914	NA	9.14725	NA	10.5907	10.219
TCGA-D5-7000-01A	TCGA-D5-7000	NA	6.9009	NA	NA	NA	7.85197	7.48184
TCGA-D5-7000-01A	TCGA-D5-7000	NA	NA	NA	12.0847	7.88322	13.167	12.7951
TCGA-DM-A0X9-01A	TCGA-DM-A0X9	5.20522	NA	NA	NA	NA	5.95946	5.5943
TCGA-DM-A0X9-01A	TCGA-DM-A0X9	6.93761	NA	NA	10.8626	8.97928	12.5545	12.1826
TCGA-DM-A0XD-01A	TCGA-DM-A0XD	NA	NA	NA	8.30178	6.61566	9.96607	9.59452
TCGA-DM-A0XF-01A	TCGA-DM-A0XF	2.34782	NA	NA	NA	NA	2.99603	2.67629
TCGA-DM-A0XF-01A	TCGA-DM-A0XF	5.85503	NA	NA	11.4492	9.64785	12.9044	12.5325
TCGA-DM-A1D0-01A	TCGA-DM-A1D0	NA	NA	4.01119	NA	NA	4.48235	4.12924
TCGA-DM-A1D0-01A	TCGA-DM-A1D0	NA	NA	NA	10.0799	7.80371	11.5025	11.1307
TCGA-DM-A1D4-01A	TCGA-DM-A1D4	NA	NA	3.65971	NA	1.58261	4.4288	4.0764
TCGA-DM-A1D4-01A	TCGA-DM-A1D4	NA	NA	NA	9.14226	NA	10.2234	9.85176
TCGA-DM-A1D6-01A	TCGA-DM-A1D6	NA	NA	6.48163	NA	NA	6.97441	6.60581
TCGA-DM-A1D6-01A	TCGA-DM-A1D6	NA	NA	8.93975	11.2269	8.81074	12.8037	12.4318
TCGA-DM-A1D7-01A	TCGA-DM-A1D7	NA	2.1788	NA	NA	NA	2.97233	2.65344
TCGA-DM-A1D7-01A	TCGA-DM-A1D7	NA	NA	NA	10.5476	8.1518	11.9962	11.6244
TCGA-DM-A1D8-01A	TCGA-DM-A1D8	2.82206	NA	2.22291	NA	NA	4.04758	3.70104
TCGA-DM-A1D8-01A	TCGA-DM-A1D8	5.78344	NA	NA	9.61682	7.08135	11.1429	10.7711
TCGA-DM-A1D9-01A	TCGA-DM-A1D9	2.73002	NA	NA	NA	NA	3.40763	3.0751
TCGA-DM-A1D9-01A	TCGA-DM-A1D9	6.41466	NA	NA	12.0168	9.29856	13.3971	13.0252
TCGA-DM-A1DA-01A	TCGA-DM-A1DA	NA	NA	NA	9.18845	6.24575	10.5913	10.2196
TCGA-DM-A1DB-01A	TCGA-DM-A1DB	NA	NA	NA	11.8882	9.67393	13.2446	12.8727
TCGA-DM-A1HA-01A	TCGA-DM-A1HA	5.15151	NA	NA	NA	3.02776	4.92901	4.5709
TCGA-DM-A1HA-01A	TCGA-DM-A1HA	8.42769	NA	NA	12.5041	10.3232	13.9755	13.6035
TCGA-DM-A1HB-01A	TCGA-DM-A1HB	7.86004	7.67448	NA	NA	NA	9.62616	9.25473
TCGA-DM-A1HB-01A	TCGA-DM-A1HB	6.25588	NA	NA	9.92641	7.55821	11.4673	11.0955
TCGA-DM-A280-01A	TCGA-DM-A280	NA	NA	5.35093	NA	NA	5.83808	5.47351
TCGA-DM-A280-01A	TCGA-DM-A280	NA	NA	6.01547	10.2672	7.04461	11.6202	11.2484
TCGA-DM-A282-01A	TCGA-DM-A282	4.04551	NA	NA	NA	NA	4.77941	4.42281
TCGA-DM-A282-01A	TCGA-DM-A282	NA	NA	NA	11.4698	8.1929	12.8149	12.443
TCGA-DM-A285-01A	TCGA-DM-A285	NA	NA	NA	11.3384	8.68161	12.6587	12.2868
TCGA-DM-A28A-01A	TCGA-DM-A28A	NA	NA	NA	11.0038	8.6323	12.5452	12.1733
TCGA-DM-A28C-01A	TCGA-DM-A28C	NA	NA	4.28165	NA	NA	4.75735	4.40099
TCGA-DM-A28C-01A	TCGA-DM-A28C	NA	NA	NA	9.9622	8.26912	11.3068	10.935
TCGA-DM-A28E-01A	TCGA-DM-A28E	NA	NA	NA	10.0154	NA	11.1795	10.8078
TCGA-DM-A28F-01A	TCGA-DM-A28F	2.88801	NA	NA	NA	NA	3.57554	3.23874
TCGA-DM-A28F-01A	TCGA-DM-A28F	NA	NA	NA	9.84699	6.89821	11.2504	10.8786
TCGA-DM-A28G-01A	TCGA-DM-A28G	NA	NA	4.96857	NA	NA	5.45257	5.09026
TCGA-DM-A28G-01A	TCGA-DM-A28G	NA	NA	NA	11.036	6.76738	12.2556	11.8837
TCGA-DM-A28H-01A	TCGA-DM-A28H	3.68546	NA	NA	NA	NA	4.40881	4.05668
TCGA-DM-A28H-01A	TCGA-DM-A28H	6.60357	NA	NA	10.5256	8.32187	12.0034	11.6315
TCGA-DM-A28K-01A	TCGA-DM-A28K	NA	2.79095	5.63944	NA	NA	6.12847	5.76256
TCGA-DM-A28K-01A	TCGA-DM-A28K	NA	4.85881	5.30462	8.93356	6.73691	10.3512	9.97957
TCGA-DM-A28M-01A	TCGA-DM-A28M	NA	NA	6.06277	9.04376	7.09227	10.7093	10.3376
TCGA-F4-6459-01A	TCGA-F4-6459	NA	3.87525	NA	NA	NA	4.78371	4.42706
TCGA-F4-6459-01A	TCGA-F4-6459	NA	2.82828	NA	9.14457	6.70824	10.5896	10.2179
TCGA-F4-6460-01A	TCGA-F4-6460	5.21364	NA	NA	10.696	8.0782	12.0536	11.6817
TCGA-F4-6461-01A	TCGA-F4-6461	NA	NA	NA	11.1396	9.11181	12.5298	12.1579
TCGA-F4-6463-01A	TCGA-F4-6463	NA	NA	NA	11.5224	7.11358	12.6687	12.2968
TCGA-F4-6569-01A	TCGA-F4-6569	5.41492	NA	5.6821	NA	NA	7.16134	6.79233
TCGA-F4-6569-01A	TCGA-F4-6569	6.15277	NA	NA	11.6537	9.32274	13.0323	12.6604
TCGA-F4-6570-01A	TCGA-F4-6570	6.95934	NA	NA	4.69265	NA	7.72505	7.35509
TCGA-F4-6570-01A	TCGA-F4-6570	8.88963	6.71398	NA	12.1599	9.61712	13.6572	13.2853
TCGA-F4-6703-01A	TCGA-F4-6703	NA	NA	NA	12.7803	7.65799	13.9022	13.5303
TCGA-F4-6704-01A	TCGA-F4-6704	NA	NA	6.75136	11.7383	9.00376	13.0936	12.7216
TCGA-F4-6805-01A	TCGA-F4-6805	NA	NA	7.36151	12.9578	10.8092	14.3097	13.9378
TCGA-F4-6806-01A	TCGA-F4-6806	NA	NA	4.98321	NA	NA	6.45094	6.08382
TCGA-F4-6806-01A	TCGA-F4-6806	NA	NA	6.59159	10.7998	7.04321	12.0286	11.6567
TCGA-F4-6807-01A	TCGA-F4-6807	NA	NA	NA	10.7295	8.93096	12.2678	11.8959
TCGA-F4-6808-01A	TCGA-F4-6808	NA	NA	NA	9.43936	6.81274	10.8781	10.5063
TCGA-F4-6809-01A	TCGA-F4-6809	NA	NA	NA	13.5863	10.9009	14.8984	14.5265
TCGA-F4-6854-01A	TCGA-F4-6854	NA	NA	NA	11.8249	9.36484	13.1416	12.7697
TCGA-F4-6855-01A	TCGA-F4-6855	NA	NA	NA	12.2597	10.079	13.6221	13.2501
TCGA-F4-6856-01A	TCGA-F4-6856	NA	NA	NA	11.2596	9.71639	12.7567	12.3848
TCGA-G4-6293-01A	TCGA-G4-6293	NA	NA	NA	11.3484	8.72892	12.7675	12.3956
TCGA-G4-6294-01A	TCGA-G4-6294	NA	NA	NA	9.8543	7.48642	11.0234	10.6516
TCGA-G4-6295-01A	TCGA-G4-6295	NA	NA	3.89831	NA	NA	4.36731	4.01575
TCGA-G4-6295-01A	TCGA-G4-6295	NA	NA	6.91179	12.0431	9.35764	13.3516	12.9797
TCGA-G4-6297-01A	TCGA-G4-6297	NA	NA	NA	12.2561	10.1508	13.6695	13.2976
TCGA-G4-6298-01A	TCGA-G4-6298	NA	NA	3.83868	NA	NA	4.30647	3.95579
TCGA-G4-6298-01A	TCGA-G4-6298	NA	NA	NA	10.9366	8.52101	12.3141	11.9422
TCGA-G4-6299-01A	TCGA-G4-6299	NA	NA	NA	11.7208	9.337	13.1841	12.8122
TCGA-G4-6302-01A	TCGA-G4-6302	NA	NA	NA	14.1525	10.6496	15.3611	14.9892
TCGA-G4-6303-01A	TCGA-G4-6303	NA	NA	NA	11.7916	8.93863	13.1297	12.7577
TCGA-G4-6304-01A	TCGA-G4-6304	NA	NA	NA	11.3388	9.21136	12.7104	12.3385
TCGA-G4-6306-01A	TCGA-G4-6306	NA	NA	2.29734	NA	NA	2.70659	2.3982
TCGA-G4-6306-01A	TCGA-G4-6306	NA	NA	NA	10.1076	8.36701	11.6273	11.2555
TCGA-G4-6307-01A	TCGA-G4-6307	7.08025	NA	NA	11.0062	8.80148	12.3639	11.992
TCGA-G4-6309-01A	TCGA-G4-6309	4.32509	NA	NA	NA	NA	5.06552	4.70616
TCGA-G4-6309-01A	TCGA-G4-6309	6.56571	NA	NA	10.4094	7.87024	10.9066	10.5349
TCGA-G4-6310-01A	TCGA-G4-6310	NA	NA	NA	11.75	6.34857	12.8646	12.4927
TCGA-G4-6311-01A	TCGA-G4-6311	NA	NA	5.21659	NA	NA	5.70273	5.33889
TCGA-G4-6311-01A	TCGA-G4-6311	NA	NA	NA	11.4989	8.42771	12.7386	12.3667
TCGA-G4-6314-01A	TCGA-G4-6314	NA	NA	NA	12.2455	10.7017	13.7428	13.3708
TCGA-G4-6315-01A	TCGA-G4-6315	NA	NA	NA	10.3379	7.16513	11.5666	11.1947
TCGA-G4-6317-01A	TCGA-G4-6317	NA	4.06308	NA	9.89446	5.91333	11.0814	10.7097
TCGA-G4-6317-02A	TCGA-G4-6317	NA	6.28844	NA	NA	NA	7.23639	6.86724
TCGA-G4-6317-02A	TCGA-G4-6317	NA	NA	NA	10.6408	9.48995	12.4231	12.0512
TCGA-G4-6320-01A	TCGA-G4-6320	NA	NA	NA	11.2132	8.67177	12.4879	12.116
TCGA-G4-6321-01A	TCGA-G4-6321	NA	NA	NA	11.3078	8.44512	12.5705	12.1986
TCGA-G4-6322-01A	TCGA-G4-6322	NA	NA	NA	9.5613	NA	10.6428	10.271
TCGA-G4-6323-01A	TCGA-G4-6323	4.62354	NA	NA	NA	NA	5.36963	5.00789
TCGA-G4-6323-01A	TCGA-G4-6323	7.56568	NA	NA	11.8903	8.87478	13.1867	12.8148
TCGA-G4-6586-01A	TCGA-G4-6586	NA	NA	NA	6.71174	NA	7.78692	7.41687
TCGA-G4-6586-01A	TCGA-G4-6586	NA	NA	NA	10.2482	5.73016	11.4455	11.0737
TCGA-G4-6588-01A	TCGA-G4-6588	3.76792	3.59604	NA	NA	NA	5.46157	5.09919
TCGA-G4-6588-01A	TCGA-G4-6588	6.6318	6.44739	NA	10.891	7.35472	12.246	11.8741
TCGA-G4-6625-01A	TCGA-G4-6625	NA	2.78591	NA	NA	NA	3.63768	3.2994
TCGA-G4-6625-01A	TCGA-G4-6625	NA	NA	6.29686	10.7387	7.32804	11.8207	11.4488
TCGA-G4-6626-01A	TCGA-G4-6626	NA	NA	NA	7.48392	5.95497	9.29756	8.92627
TCGA-G4-6627-01A	TCGA-G4-6627	NA	6.38674	NA	11.5298	8.61013	12.9412	12.5693
TCGA-G4-6628-01A	TCGA-G4-6628	NA	NA	9.56886	NA	NA	10.0658	9.69424
TCGA-G4-6628-01A	TCGA-G4-6628	4.87413	4.69449	8.2717	10.0984	7.14795	11.5951	11.2232
TCGA-NH-A50T-01A	TCGA-NH-A50T	NA	NA	6.99631	NA	NA	7.49051	7.1209
TCGA-NH-A50U-01A	TCGA-NH-A50U	6.32125	NA	NA	NA	NA	7.08428	6.71543
TCGA-NH-A50V-01A	TCGA-NH-A50V	6.71854	NA	6.9892	NA	NA	8.47934	8.10856
TCGA-NH-A6GA-01A	TCGA-NH-A6GA	NA	NA	7.7898	NA	NA	8.2854	7.91479
TCGA-NH-A6GC-01A	TCGA-NH-A6GC	NA	NA	7.01862	NA	NA	7.51287	7.14323
TCGA-NH-A8F7-01A	TCGA-NH-A8F7	NA	NA	7.56758	NA	NA	8.06286	7.69248
TCGA-NH-A8F7-06A	TCGA-NH-A8F7	6.76453	NA	NA	NA	NA	7.52954	7.15987
TCGA-NH-A8F8-01A	TCGA-NH-A8F8	8.88881	8.70282	NA	NA	NA	10.6572	10.2855
TCGA-QG-A5Z1-01A	TCGA-QG-A5Z1	8.00815	NA	NA	NA	NA	8.77635	8.40535
TCGA-QL-A97D-01A	TCGA-QL-A97D	5.93249	NA	NA	NA	NA	6.6932	6.32533
TCGA-RU-A8FL-01A	TCGA-RU-A8FL	4.85598	NA	NA	NA	NA	6.59085	6.22327
TCGA-SS-A7HO-01A	TCGA-SS-A7HO	7.77724	7.01051	6.47502	NA	NA	9.5431	9.1717
